# Supplementary material for: Connectomic reconstruction predicts the functional organization of visual inputs to the navigation center of the Drosophila brain
Source: PubMed Central journal article supplement — bioRxiv. 2023 Nov 30:2023.11.29.569241. Preprint. [Version 1] doi: 10.1101/2023.11.29.569241 (PMC10705420; doi:10.1101/2023.11.29.569241), 2023-11-30

**ER2\_ad 720575940628733292**

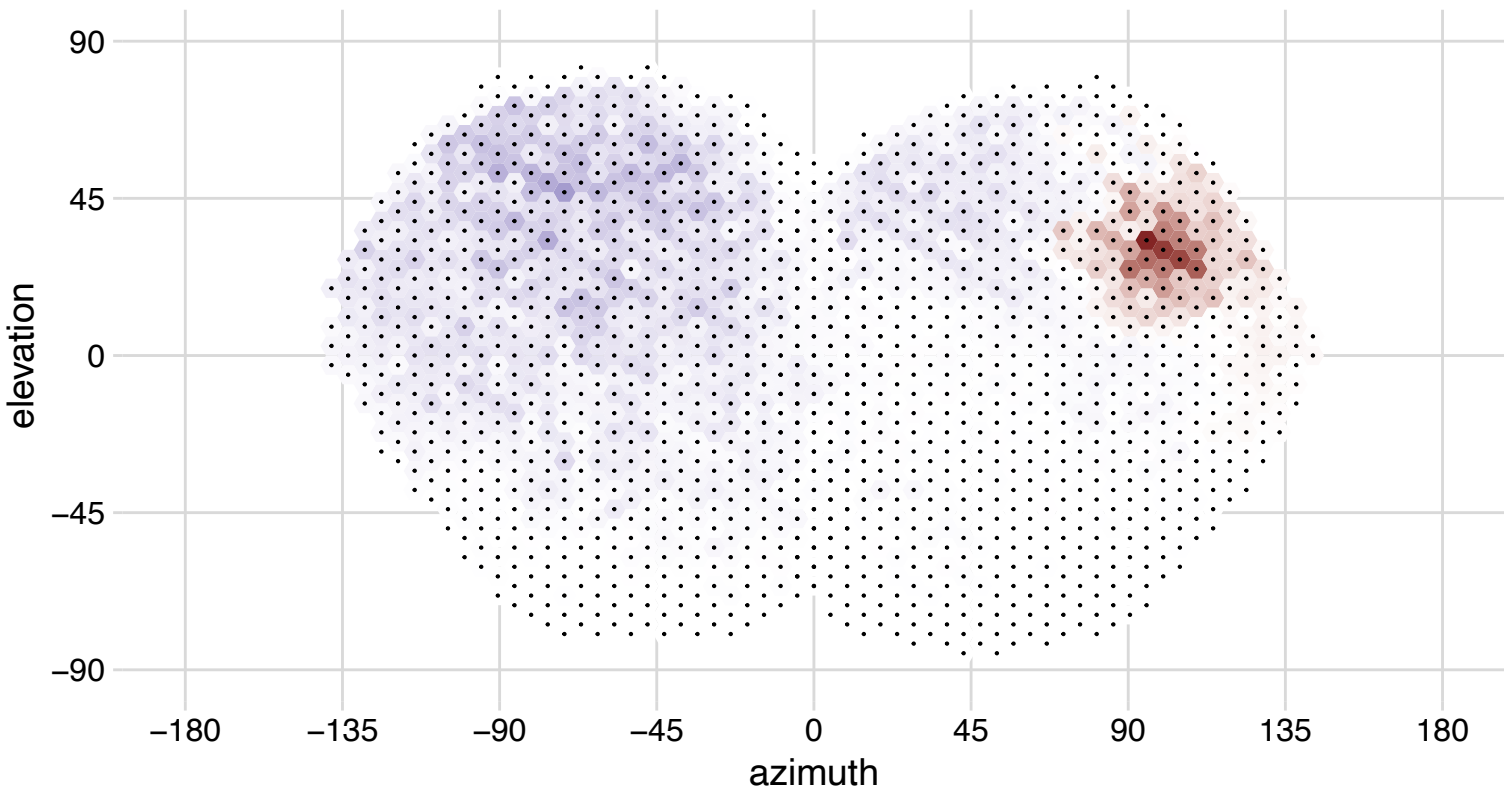

# ER2\_ad 720575940632988351

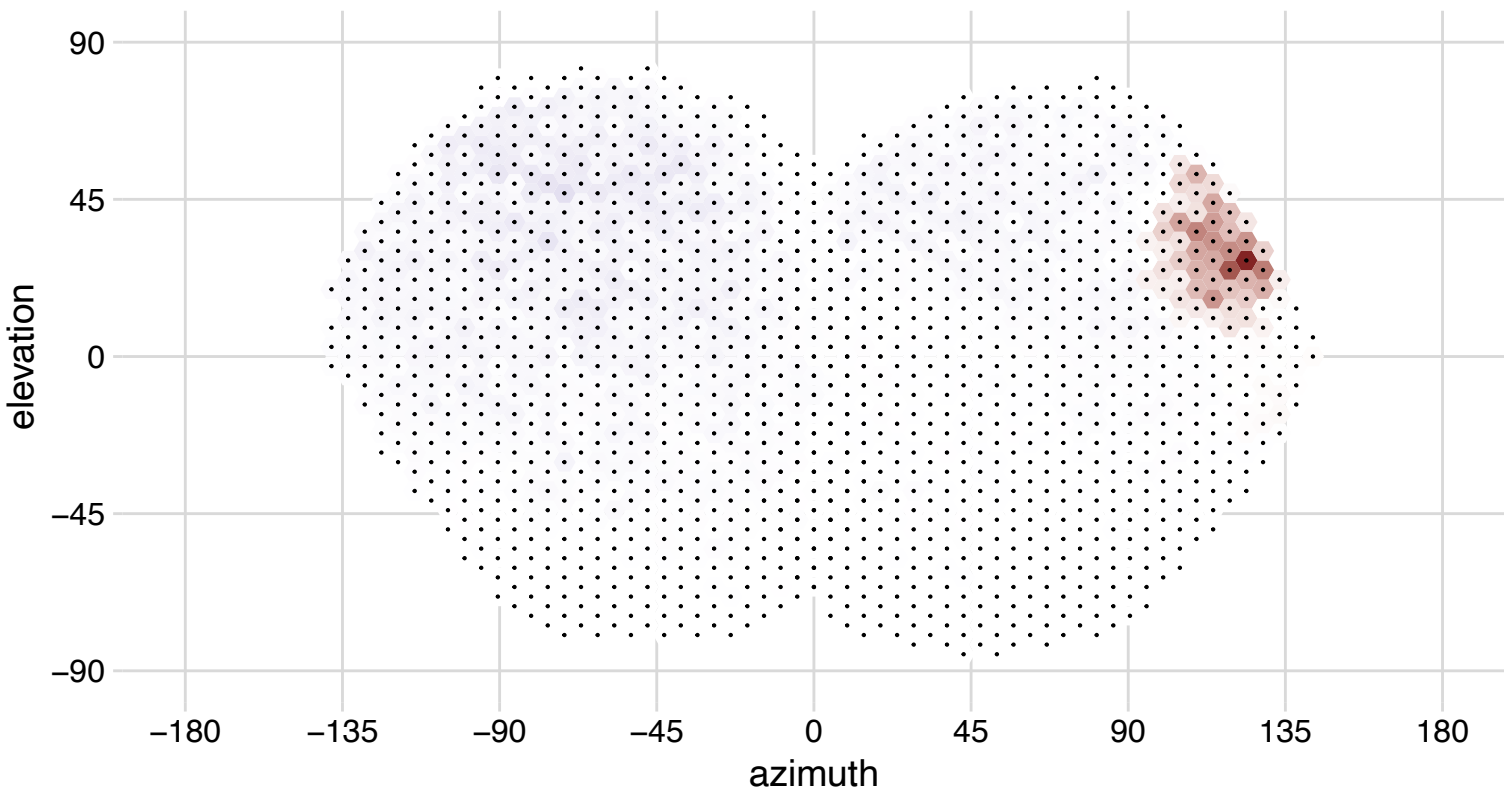

# ER2\_ad 720575940635373935

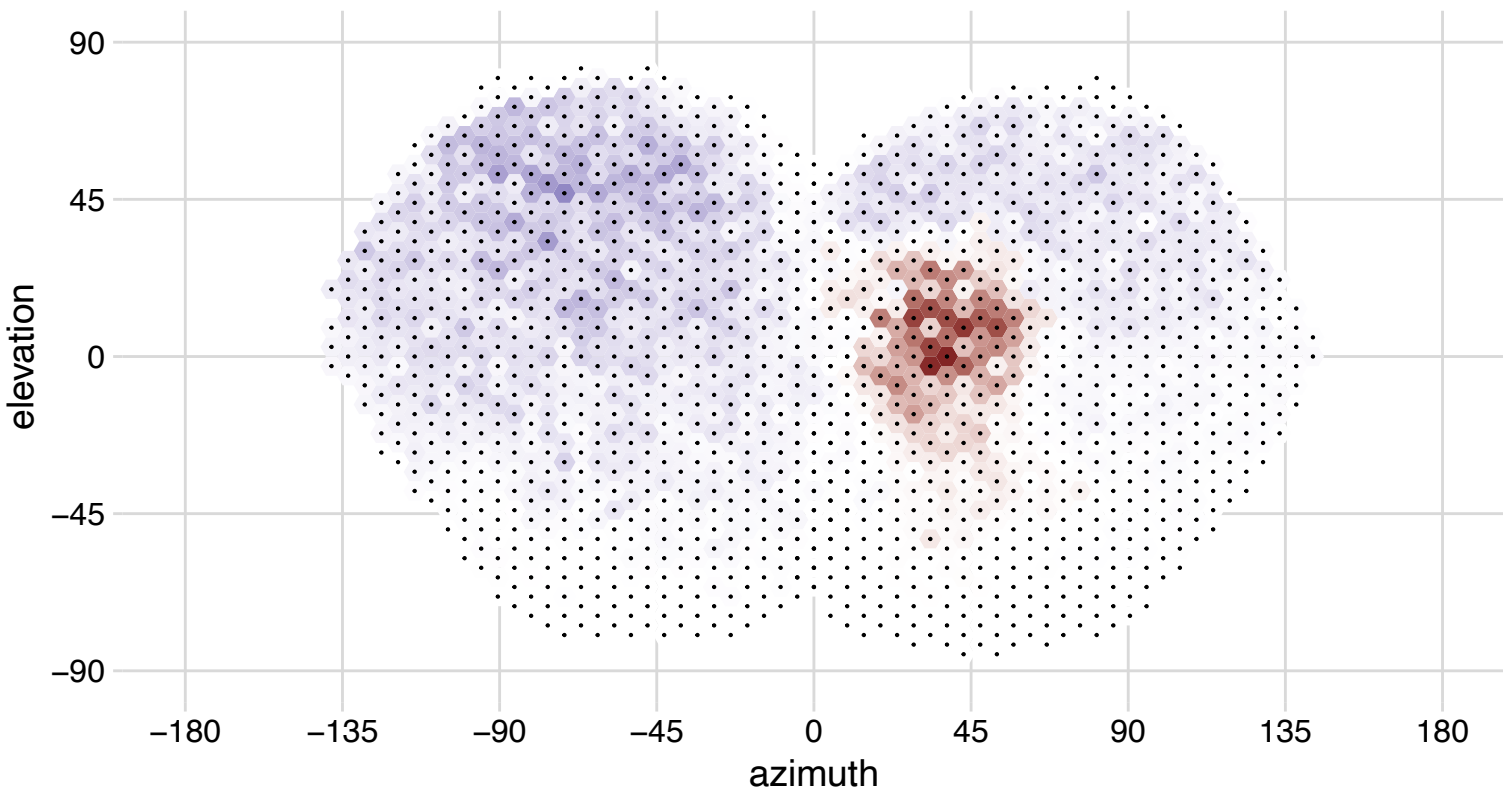

**ER2\_b 720575940604967270**

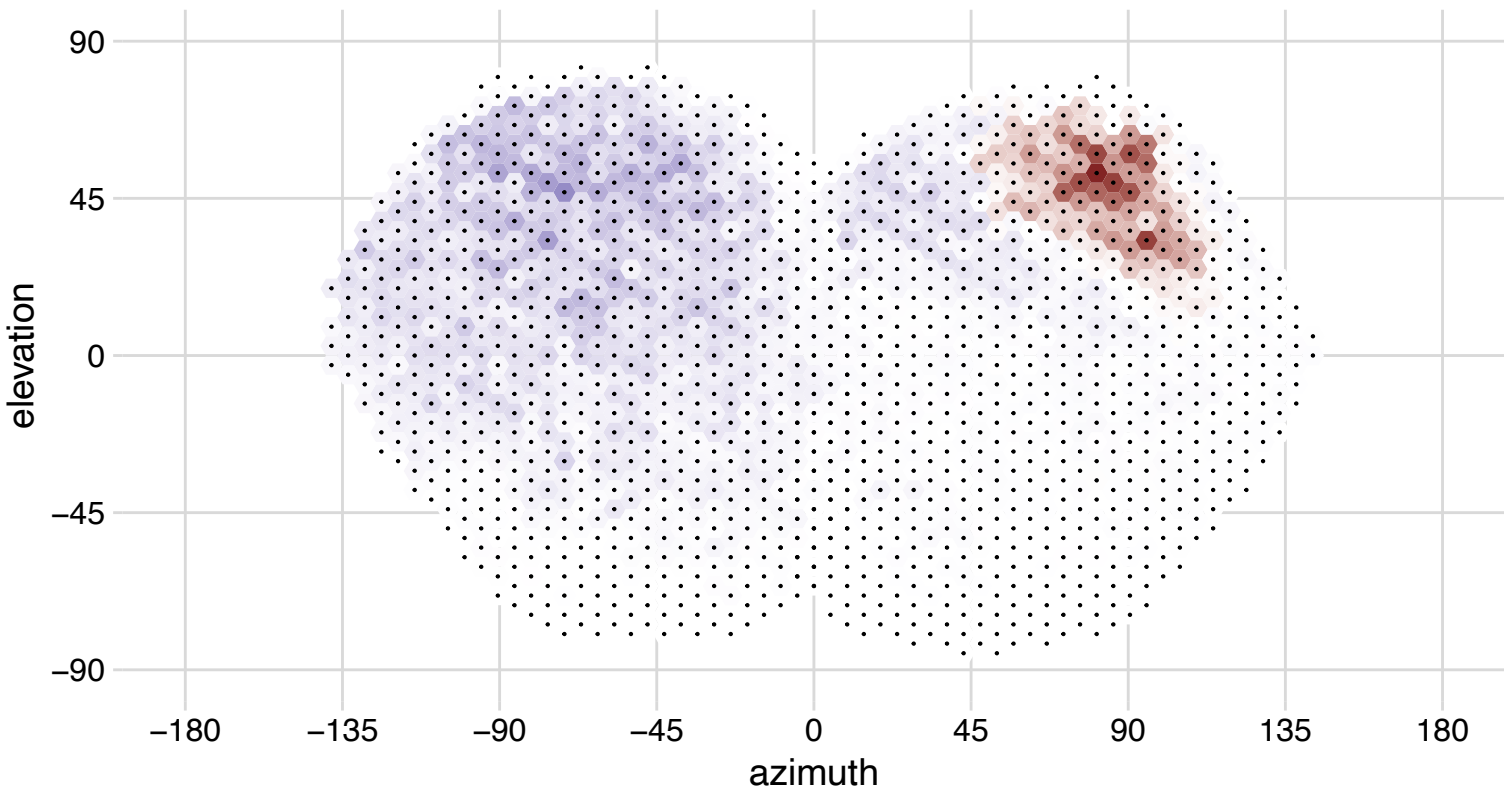



# ER2\_b 720575940616197021

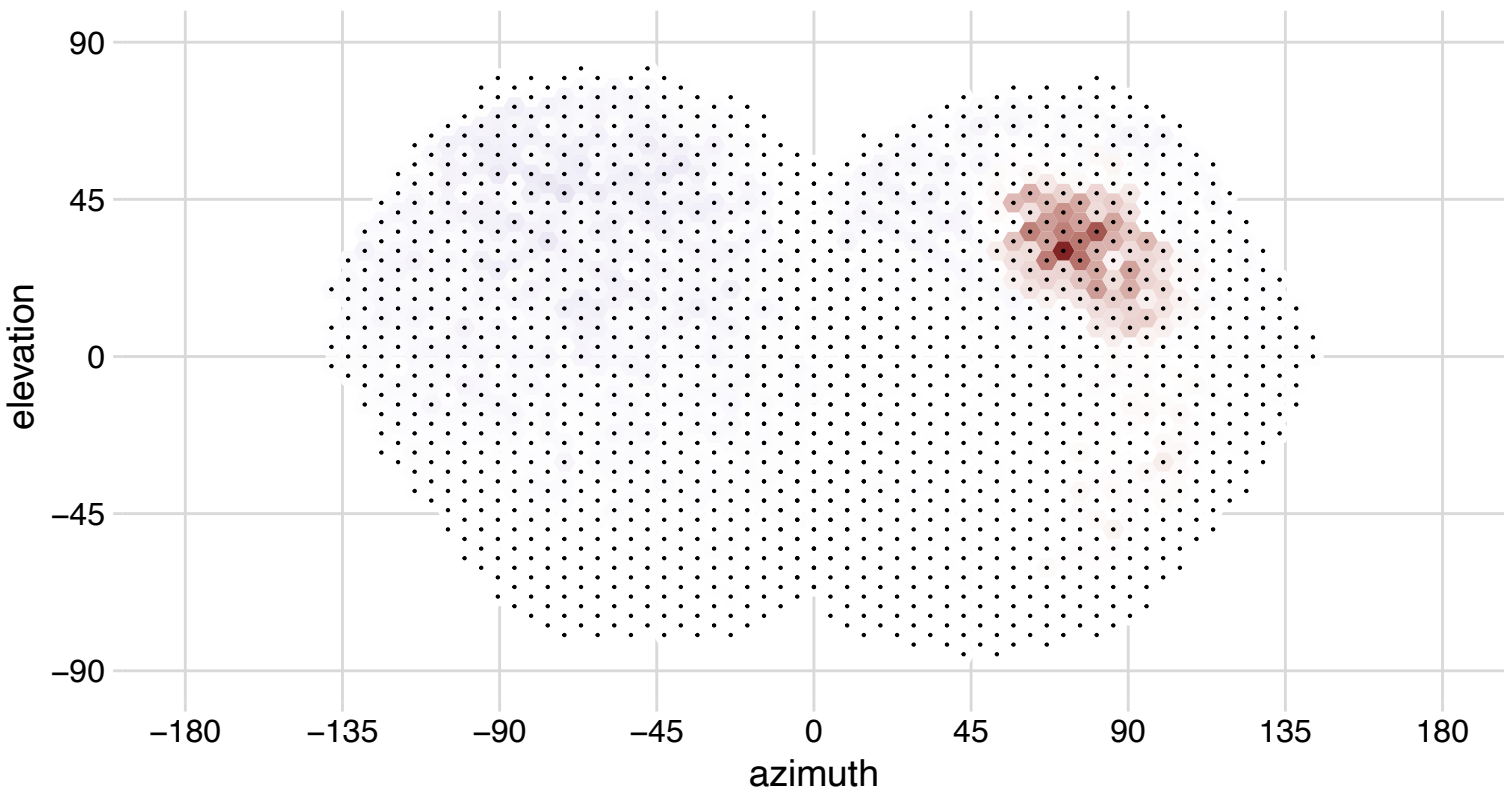

**ER2\_b 720575940625366846**

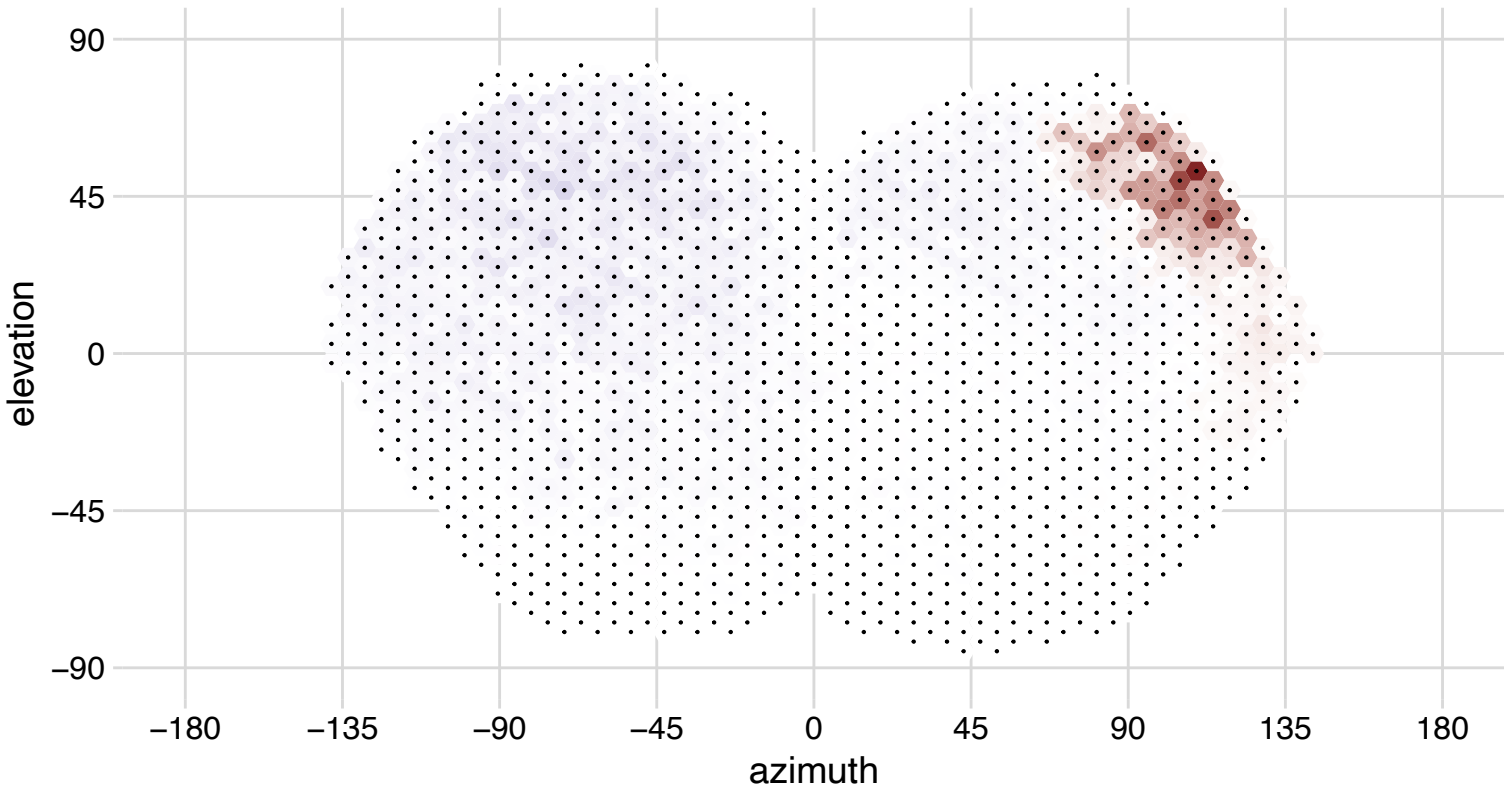

**ER2\_b 720575940628788332**

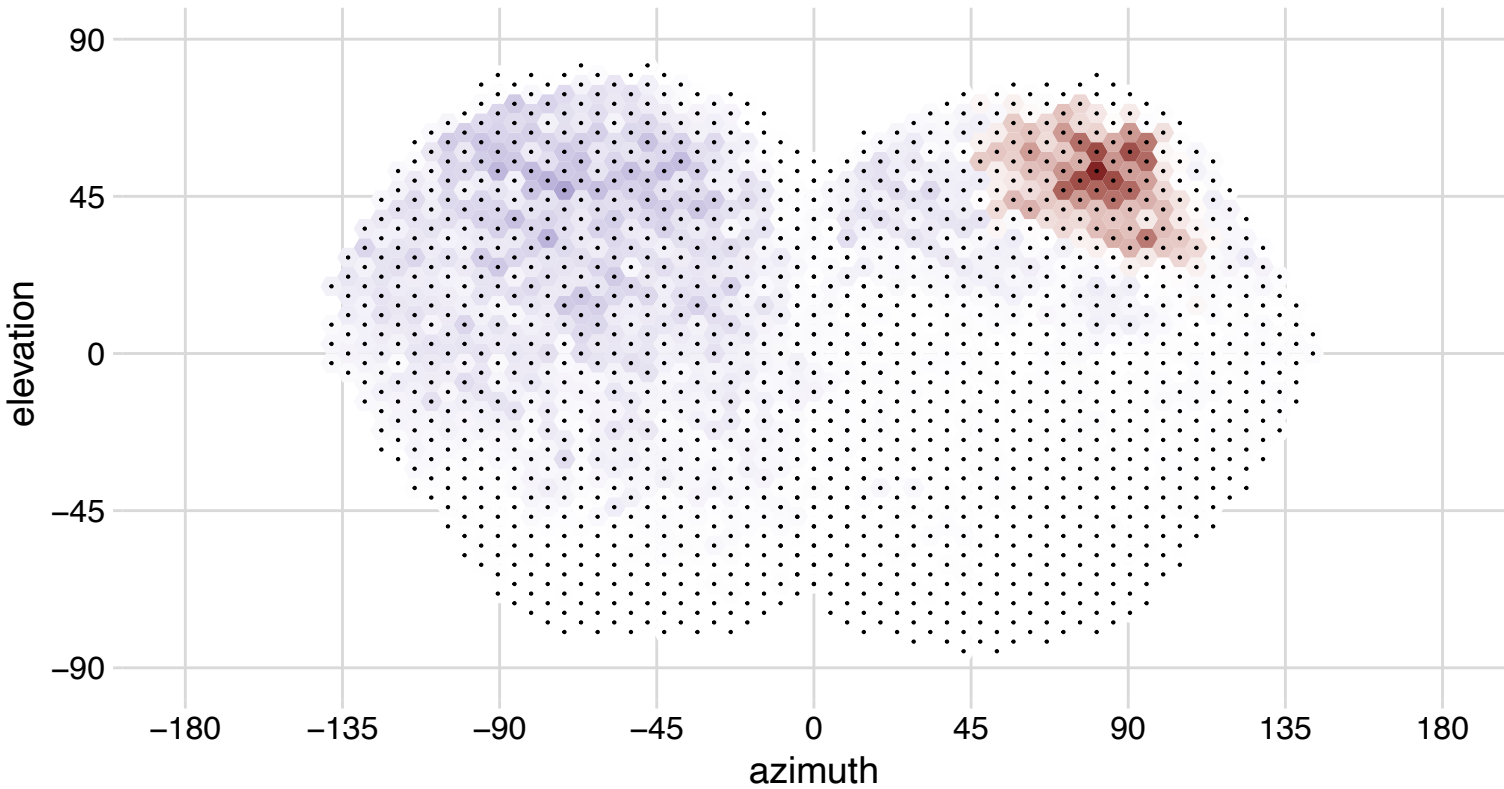

**ER2\_b 720575940637487593**

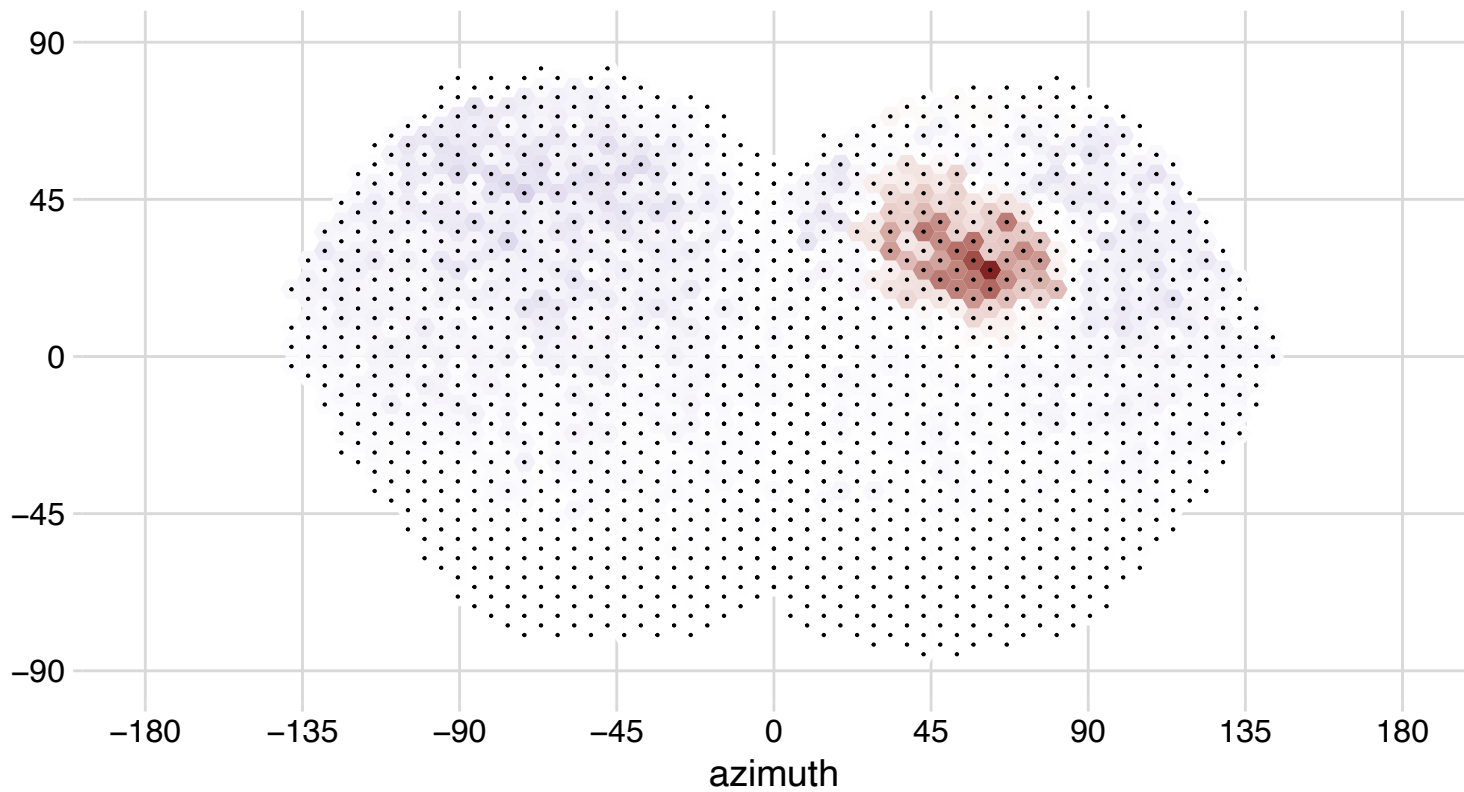

**ER2\_c 720575940610208917**

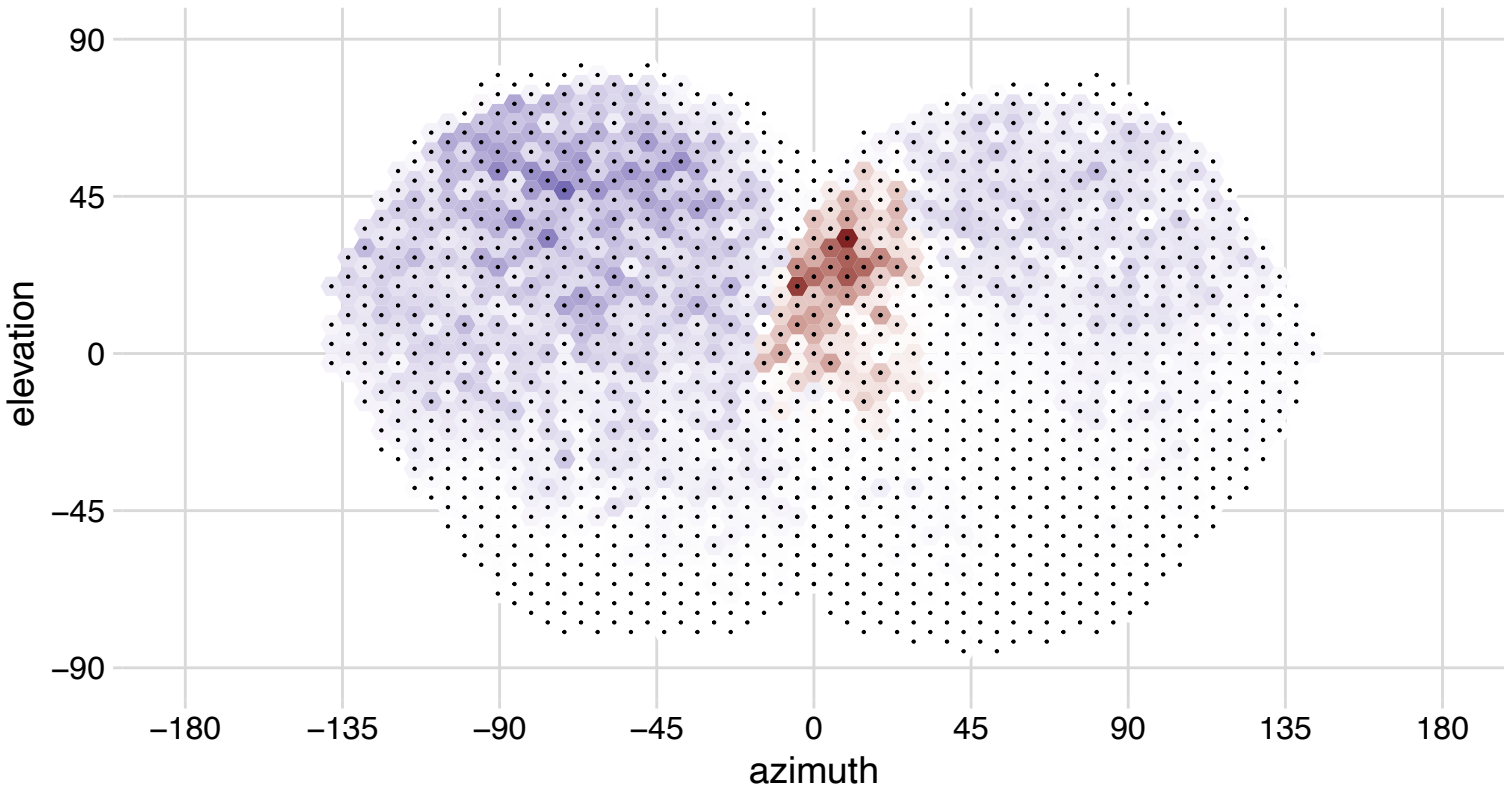

**ER2\_c 720575940613469863**

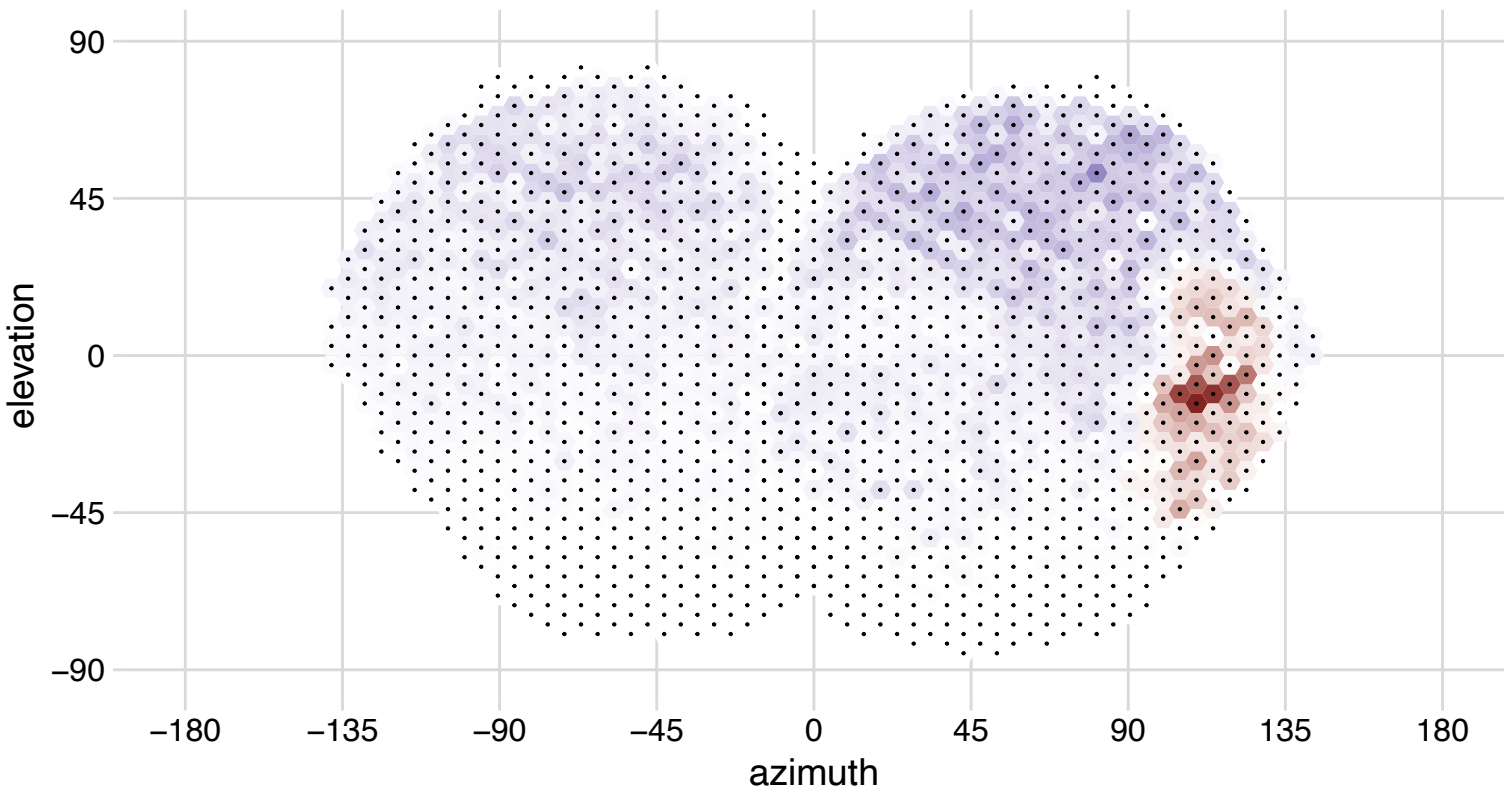

**ER2\_c 720575940616328517**

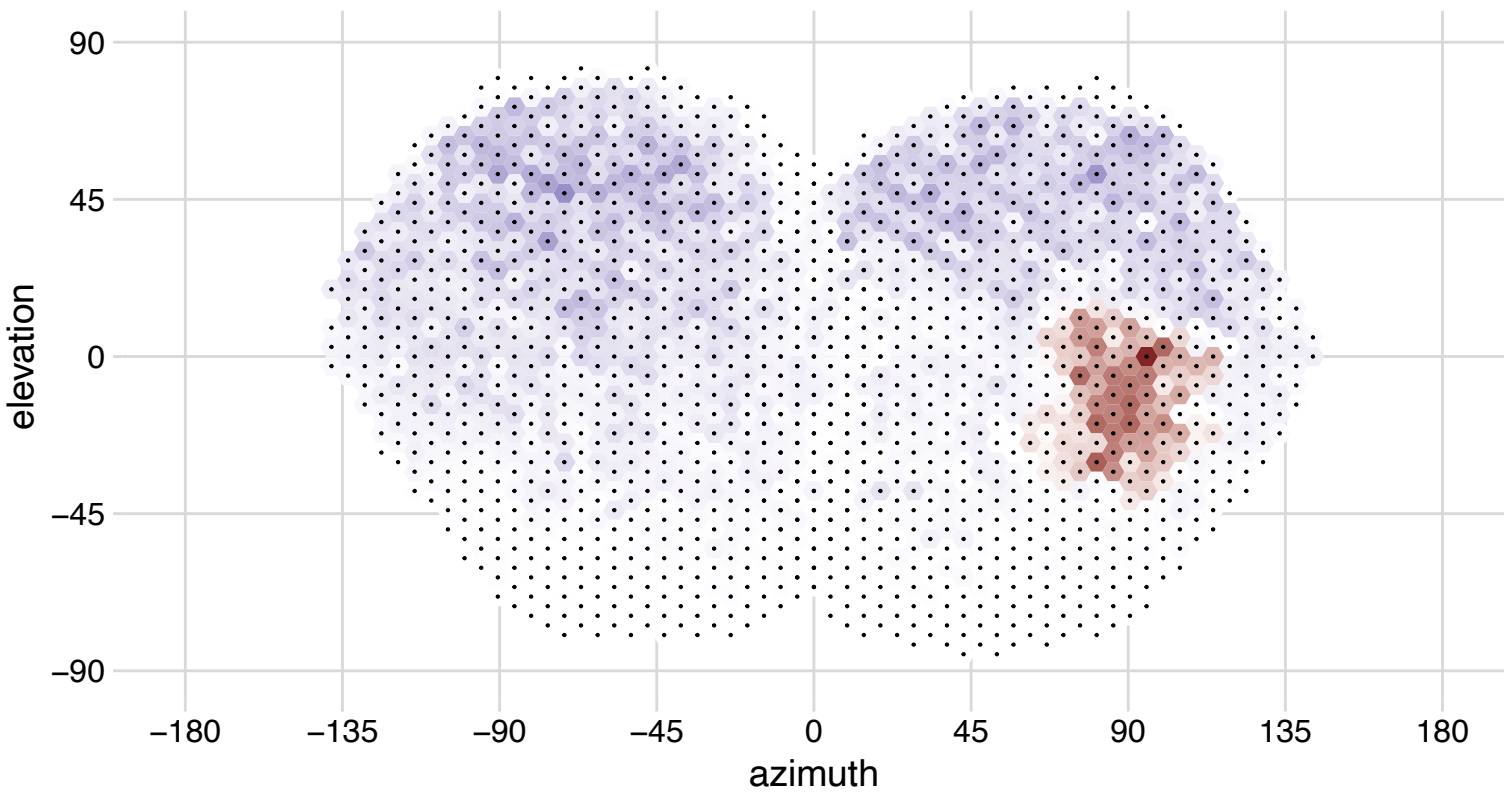

**ER2\_c 720575940617630001**

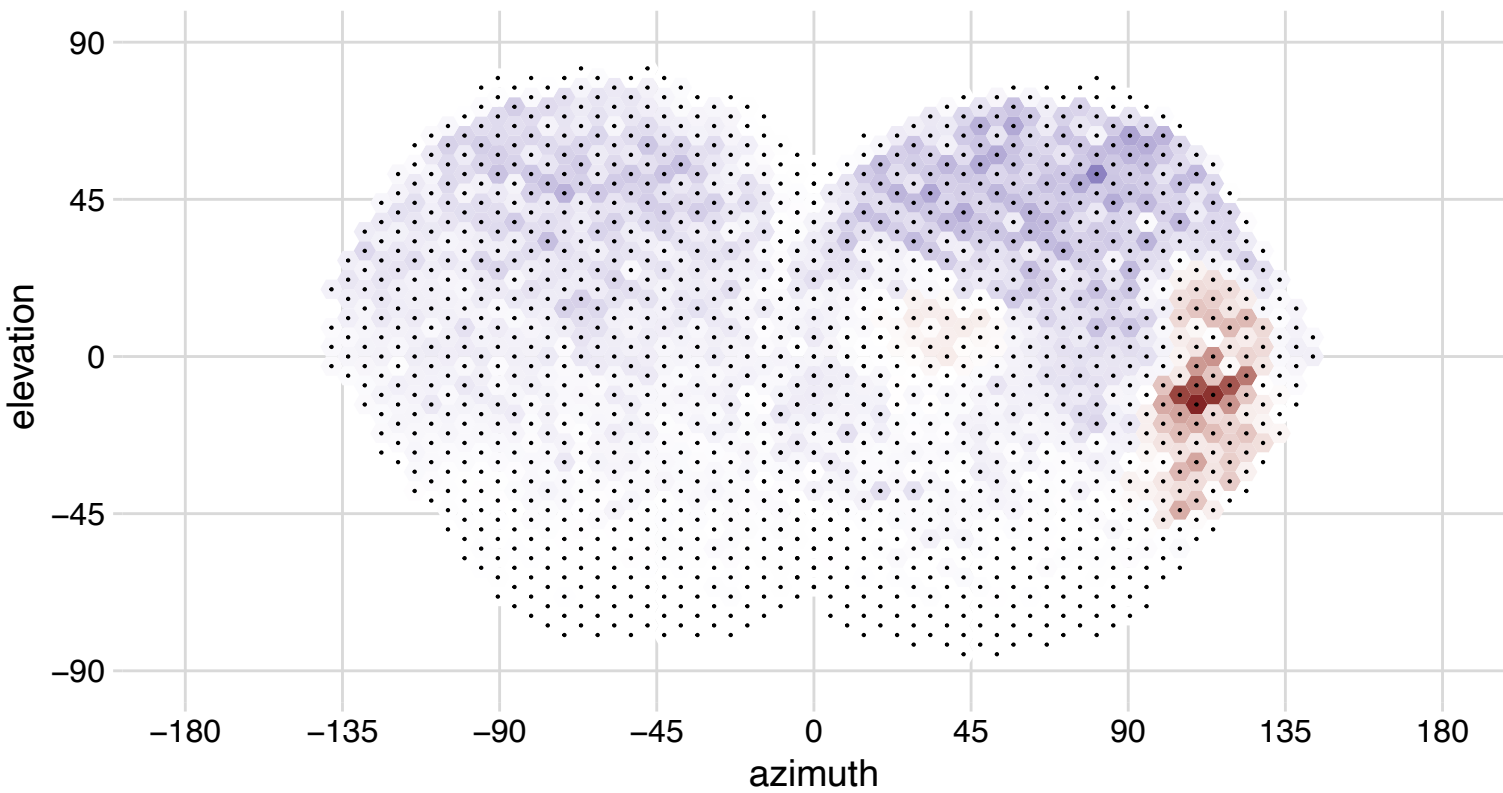



**ER2\_c 720575940619185830**

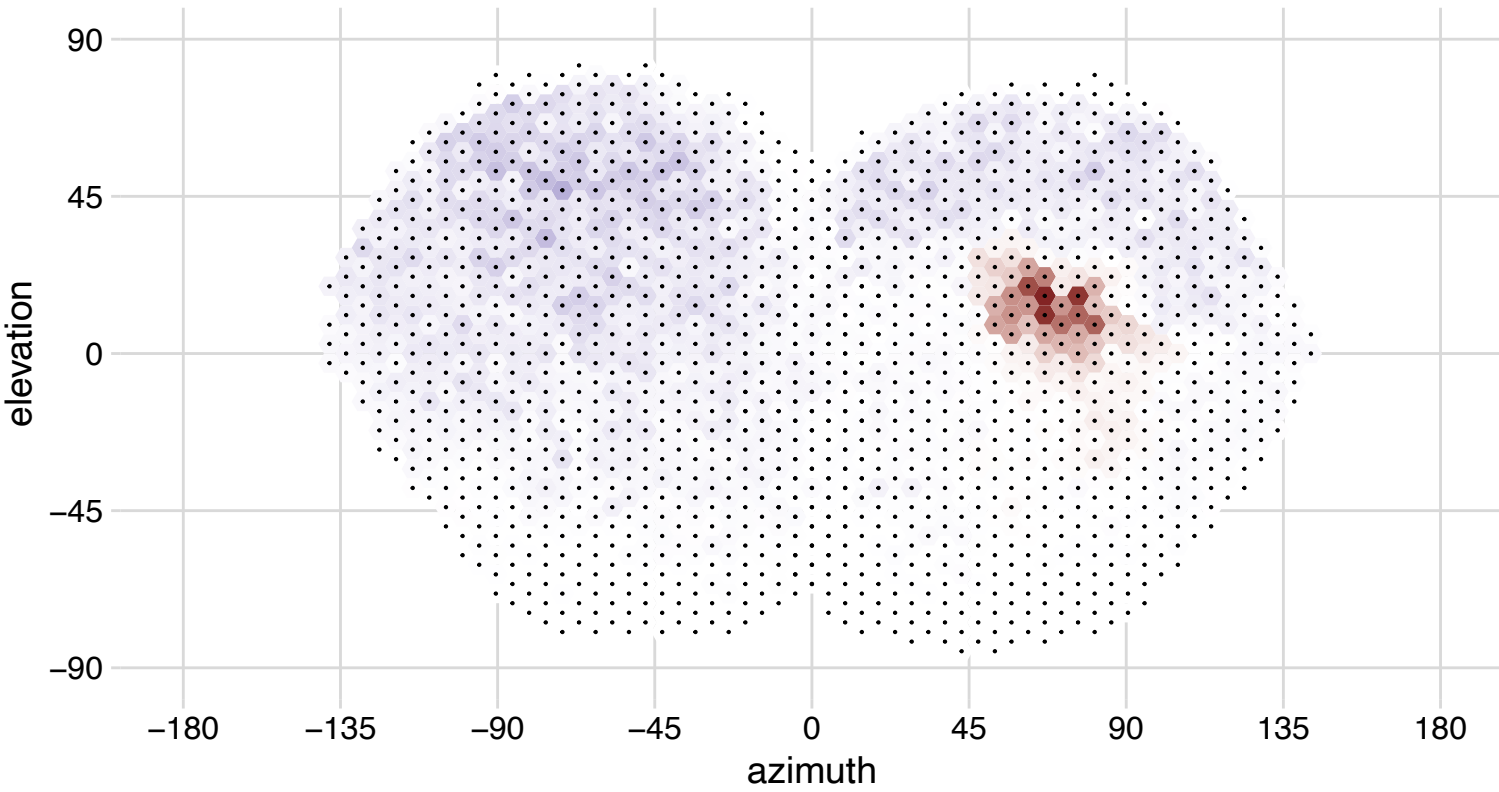

**ER2\_c 720575940619254704**

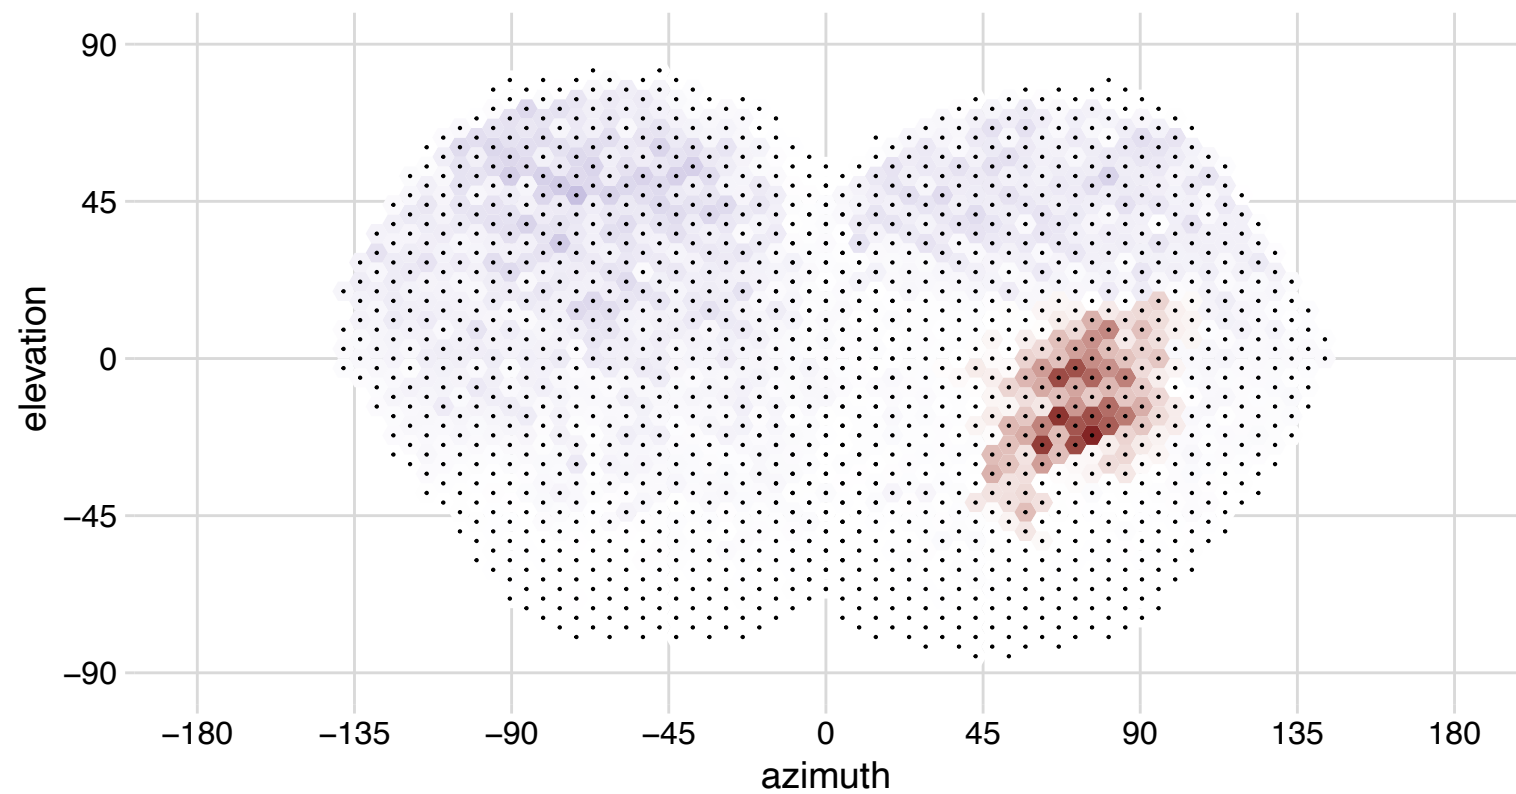

**ER2\_c 720575940620084604**

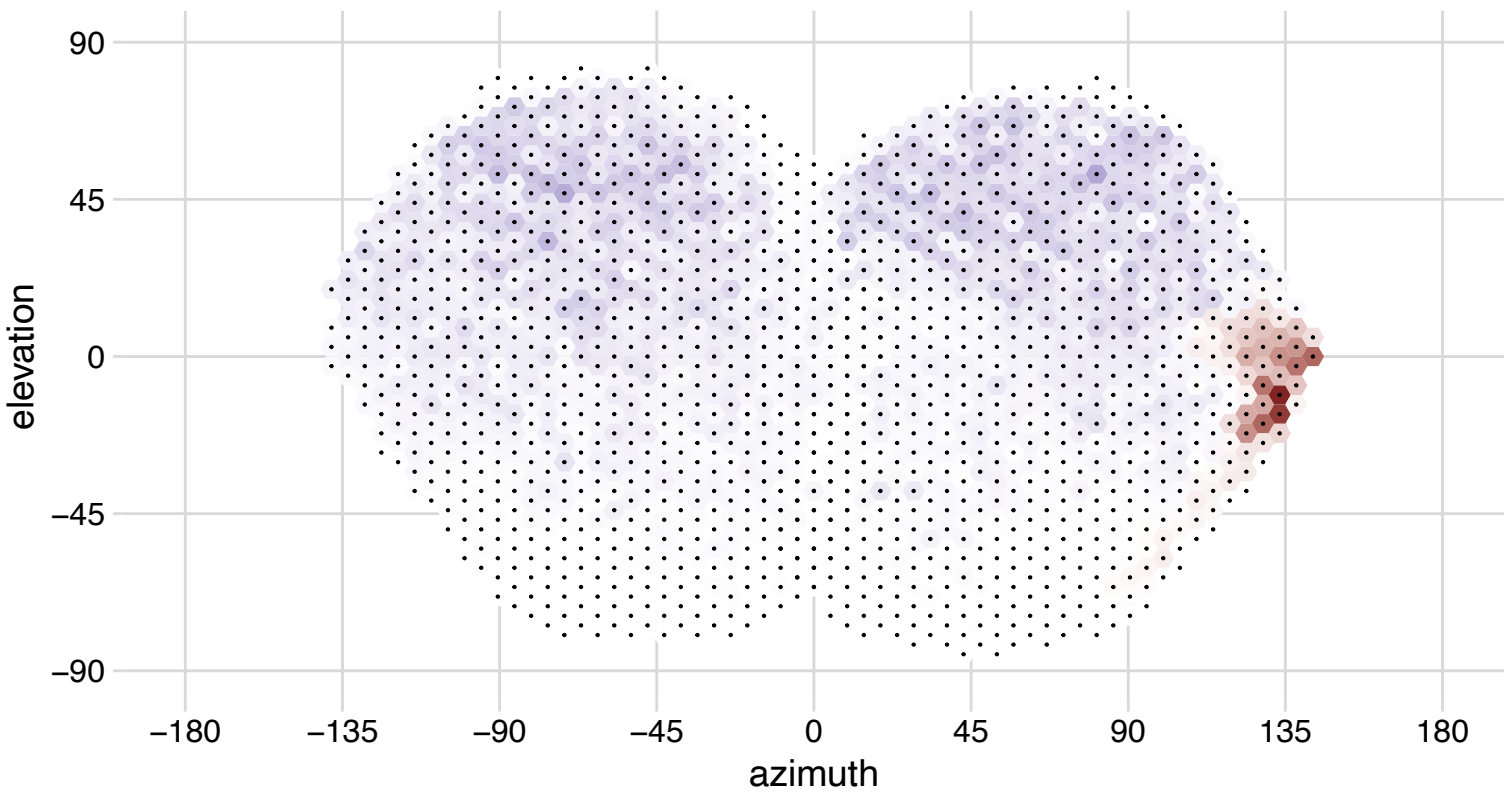

**ER2\_c 720575940621569930**

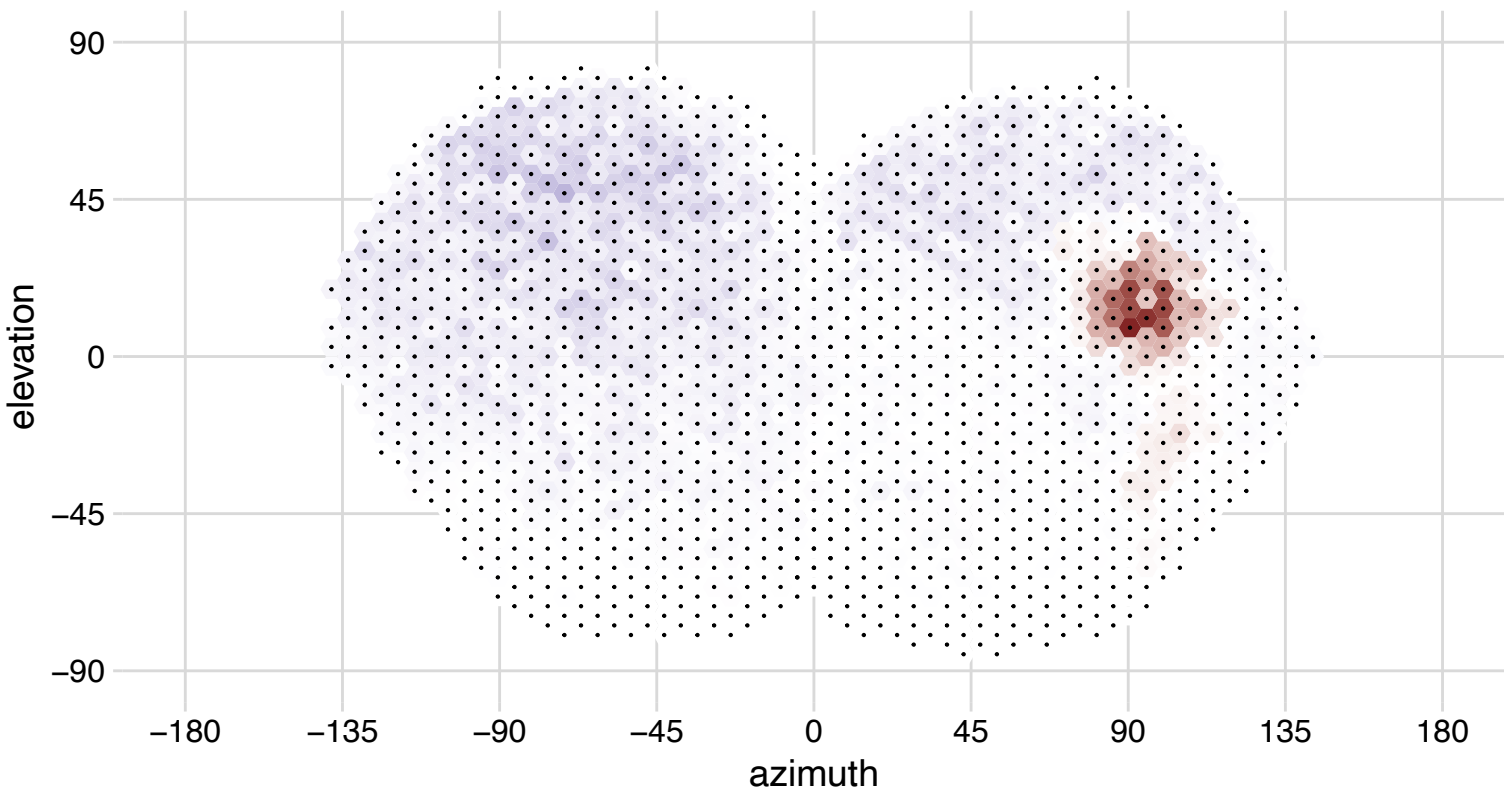

**ER2\_c 720575940626243965**

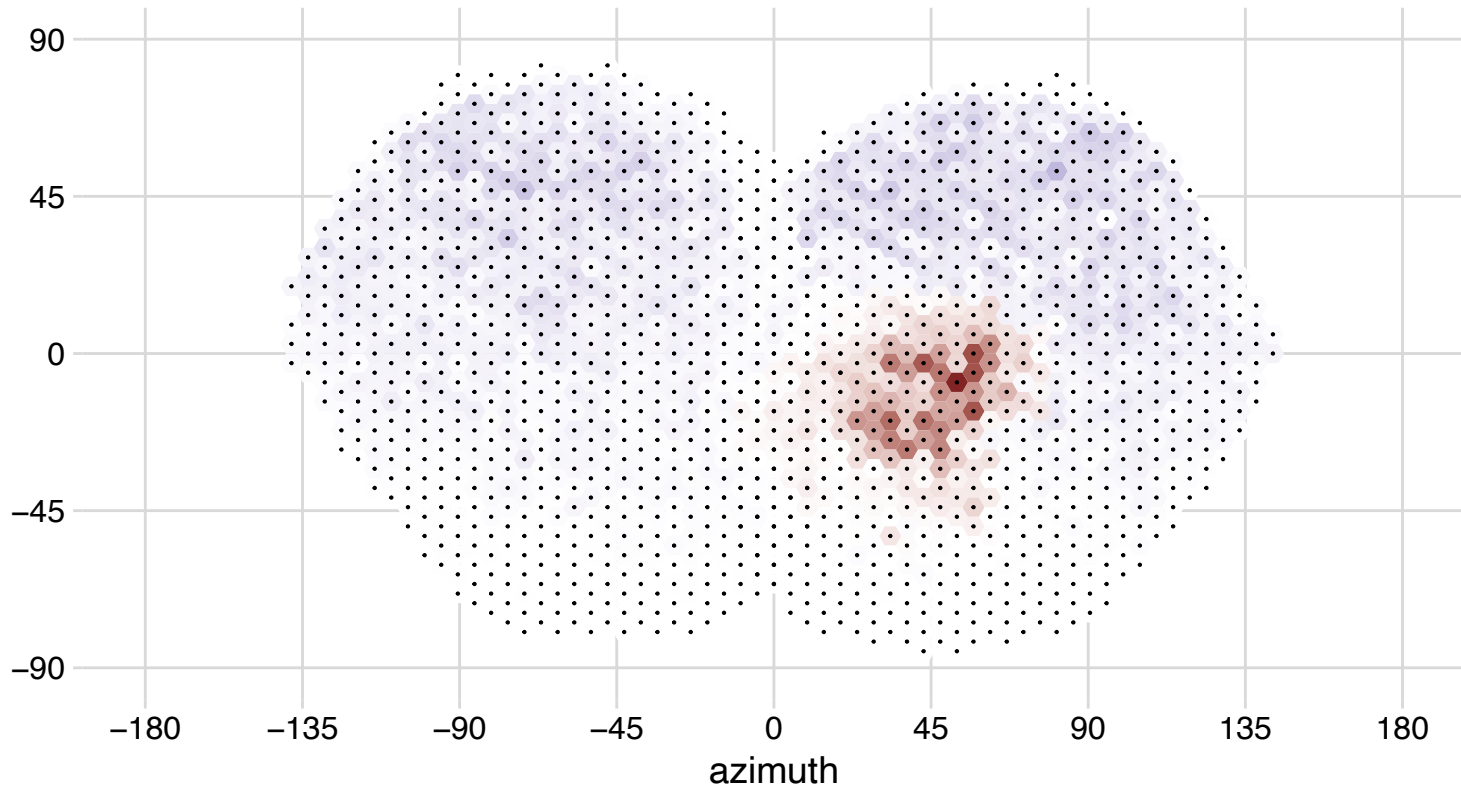

**ER2\_c 720575940628362812**

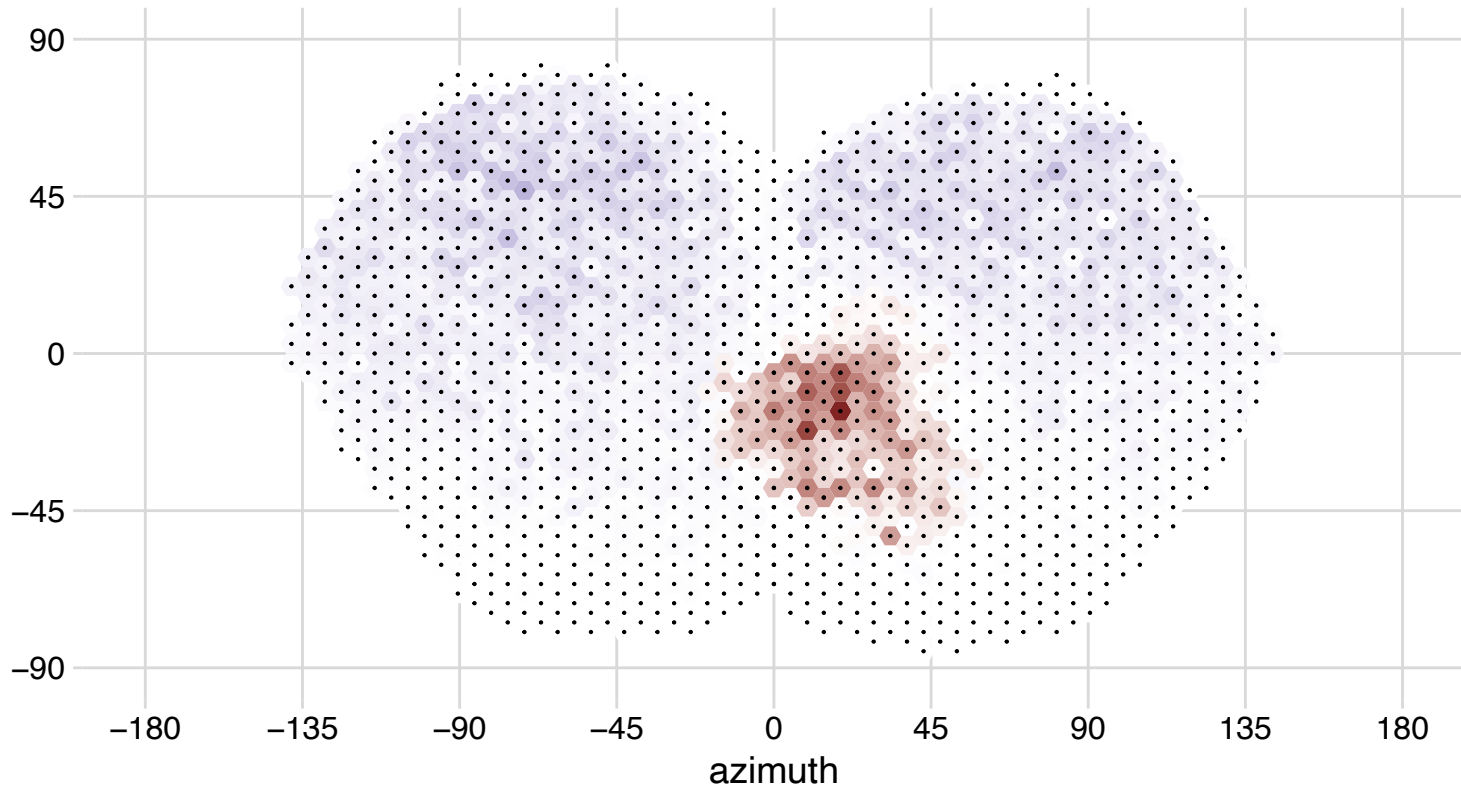

**ER2\_c 720575940636940870**

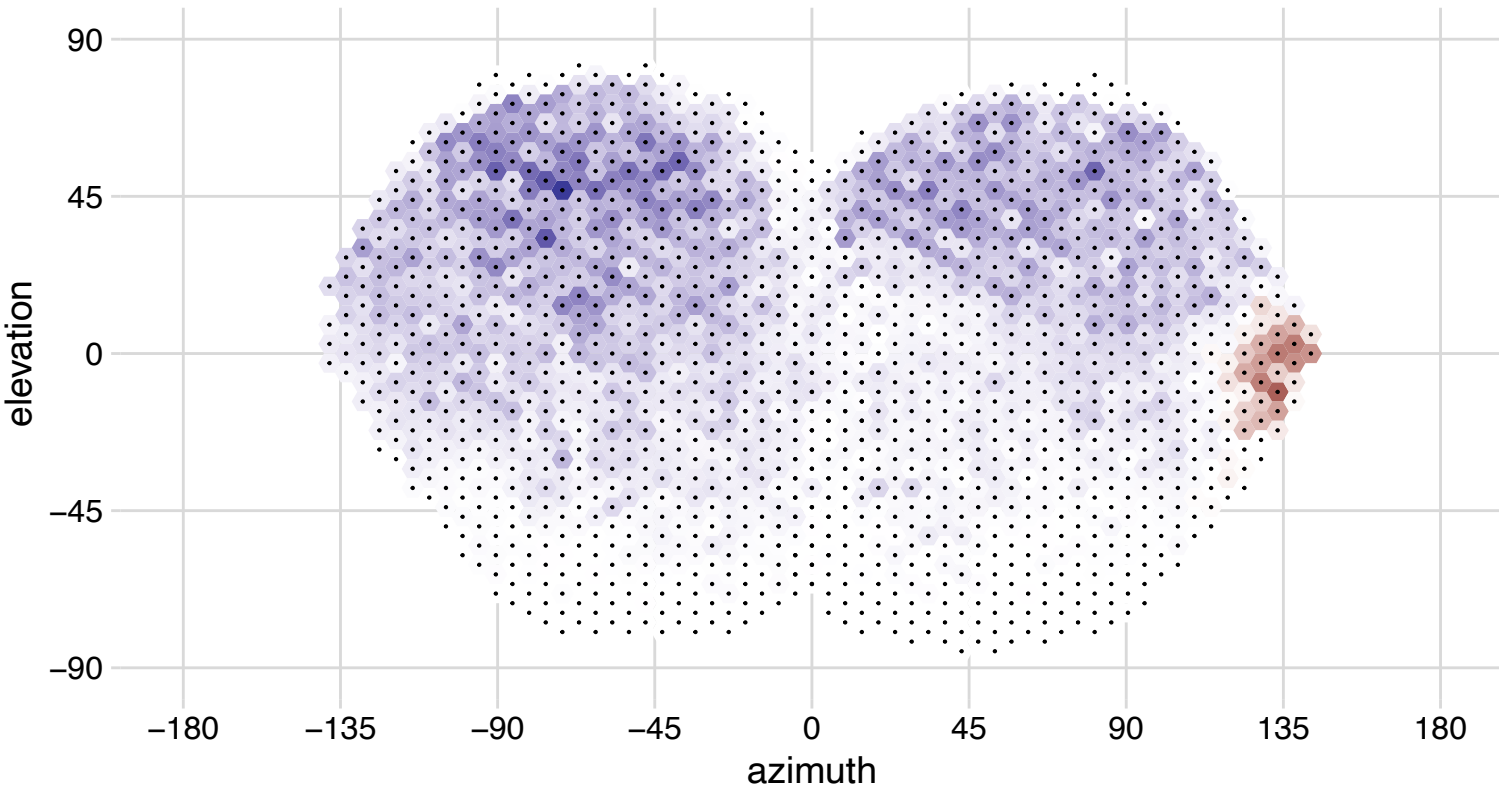

**ER2\_c 720575940643020836**

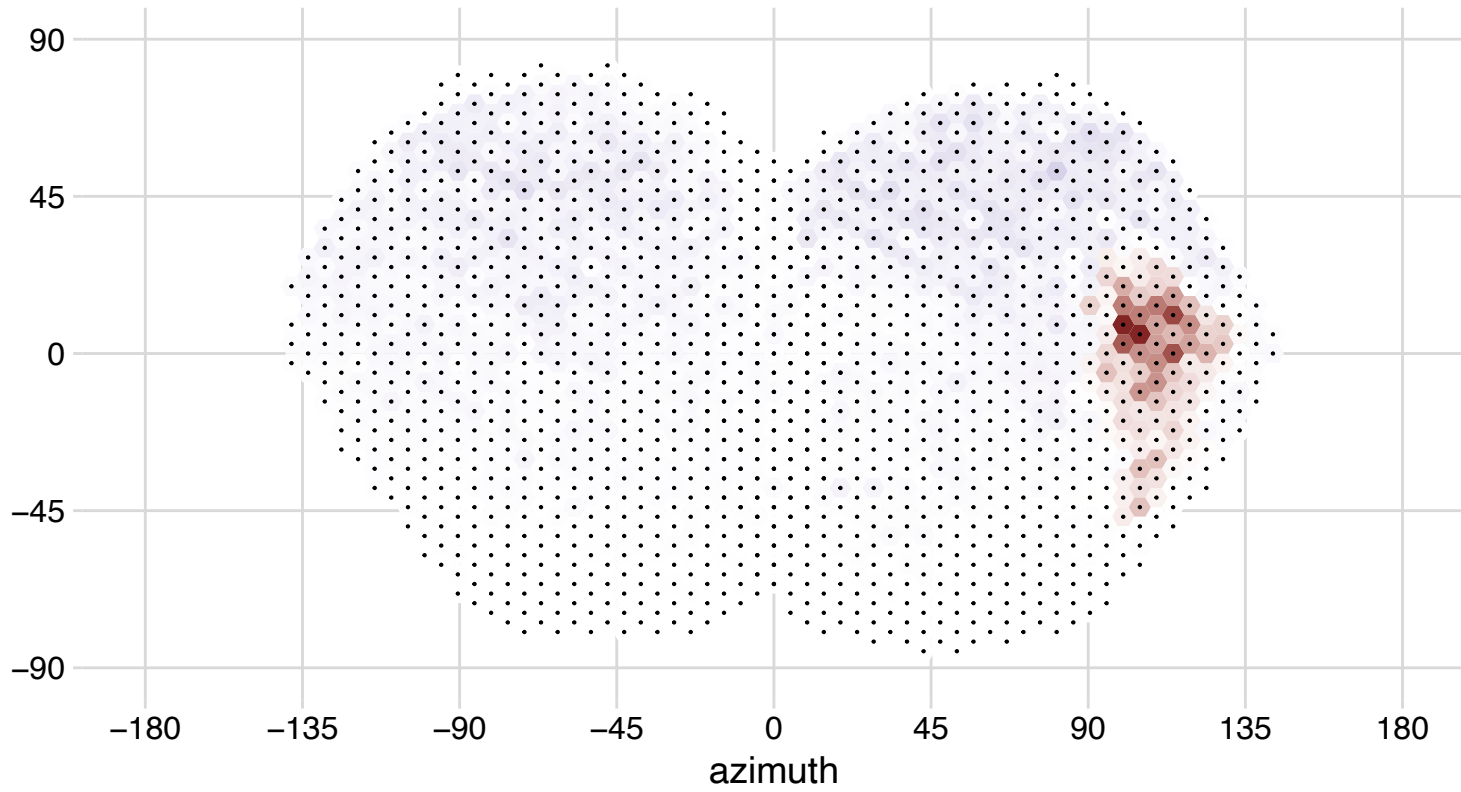



**ER2\_c 720575940643108493**

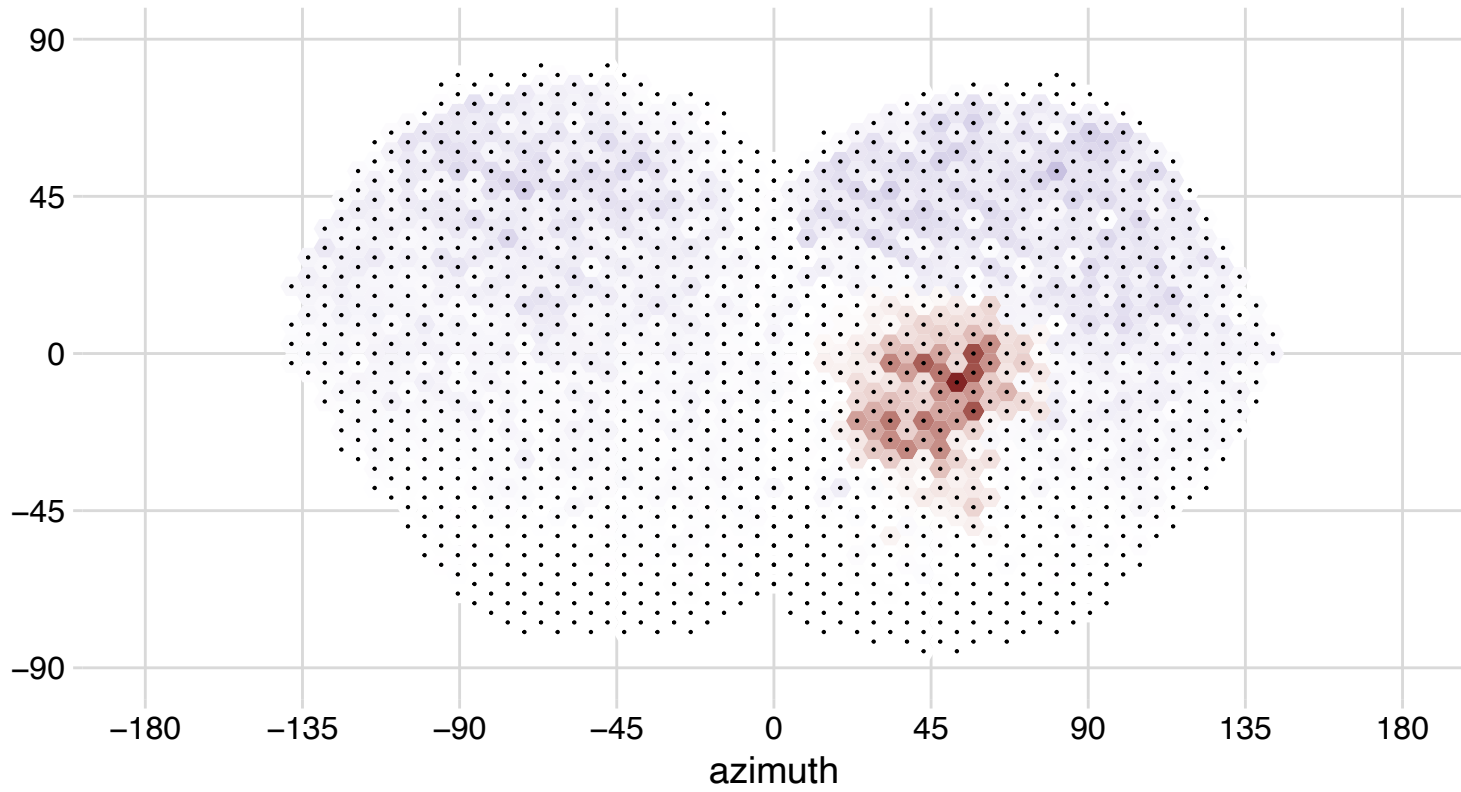

# ER3a\_ad 720575940607621059

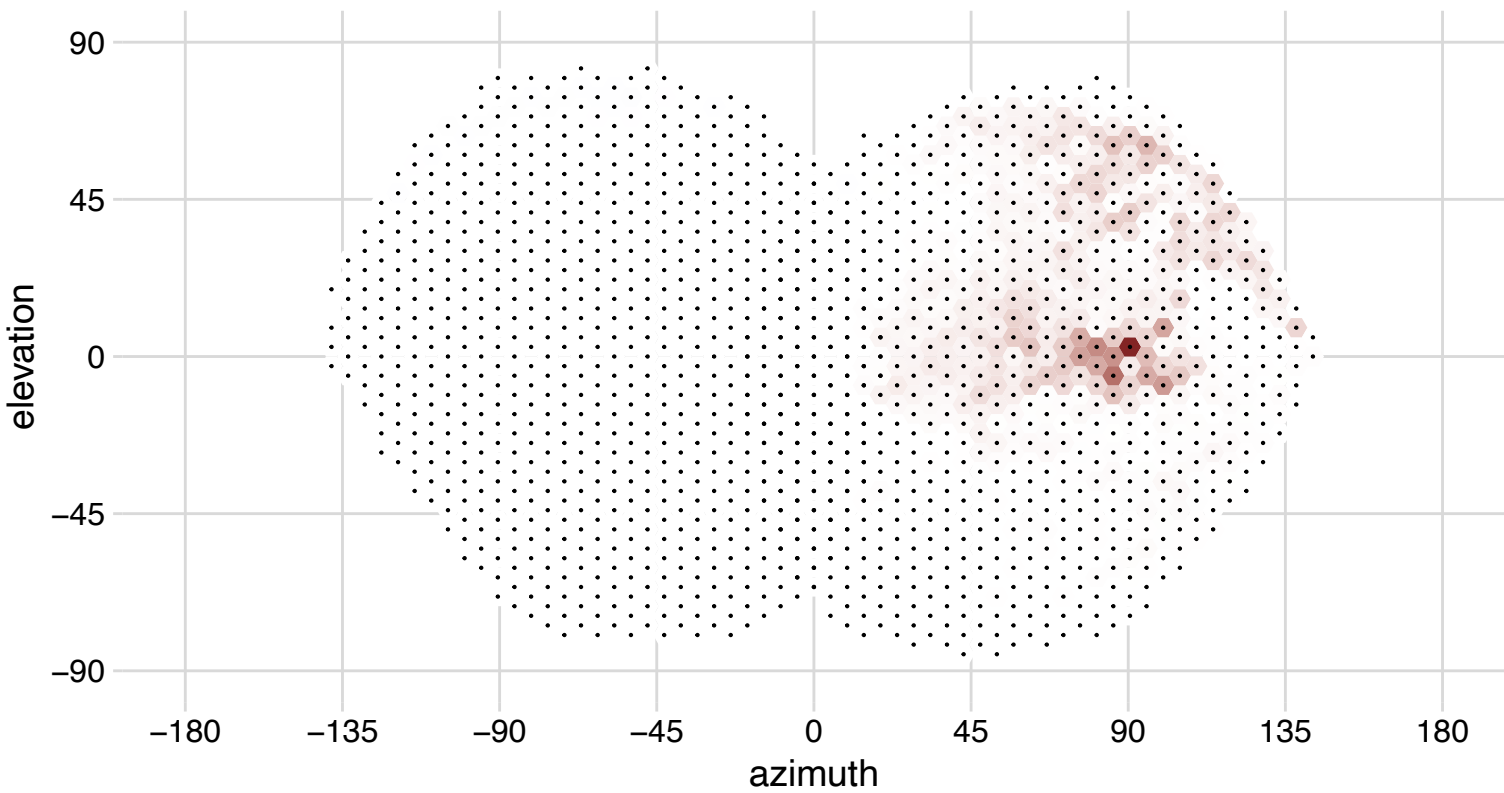

# ER3a\_ad 720575940618103513

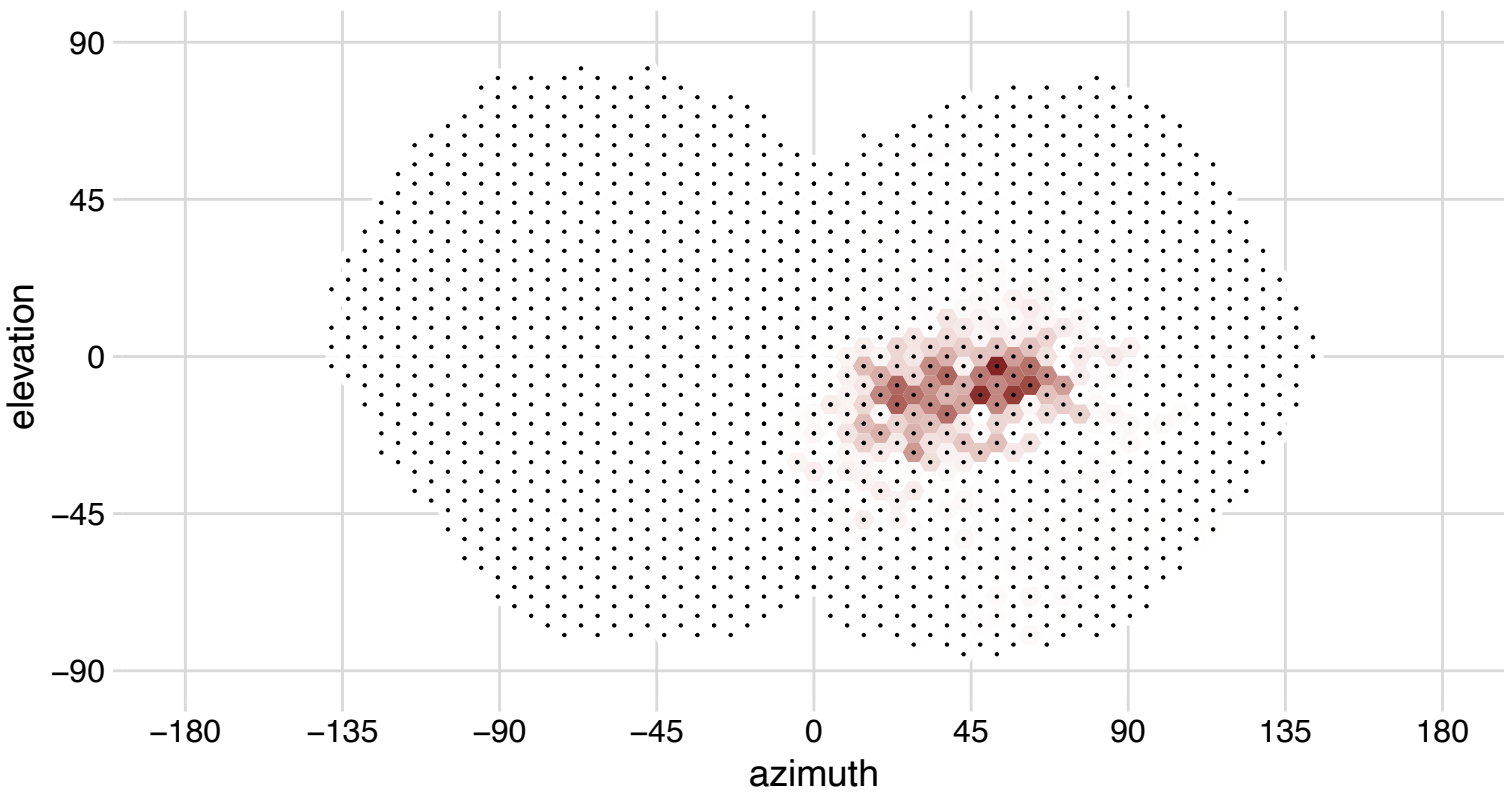

# ER3a\_ad 720575940619102886

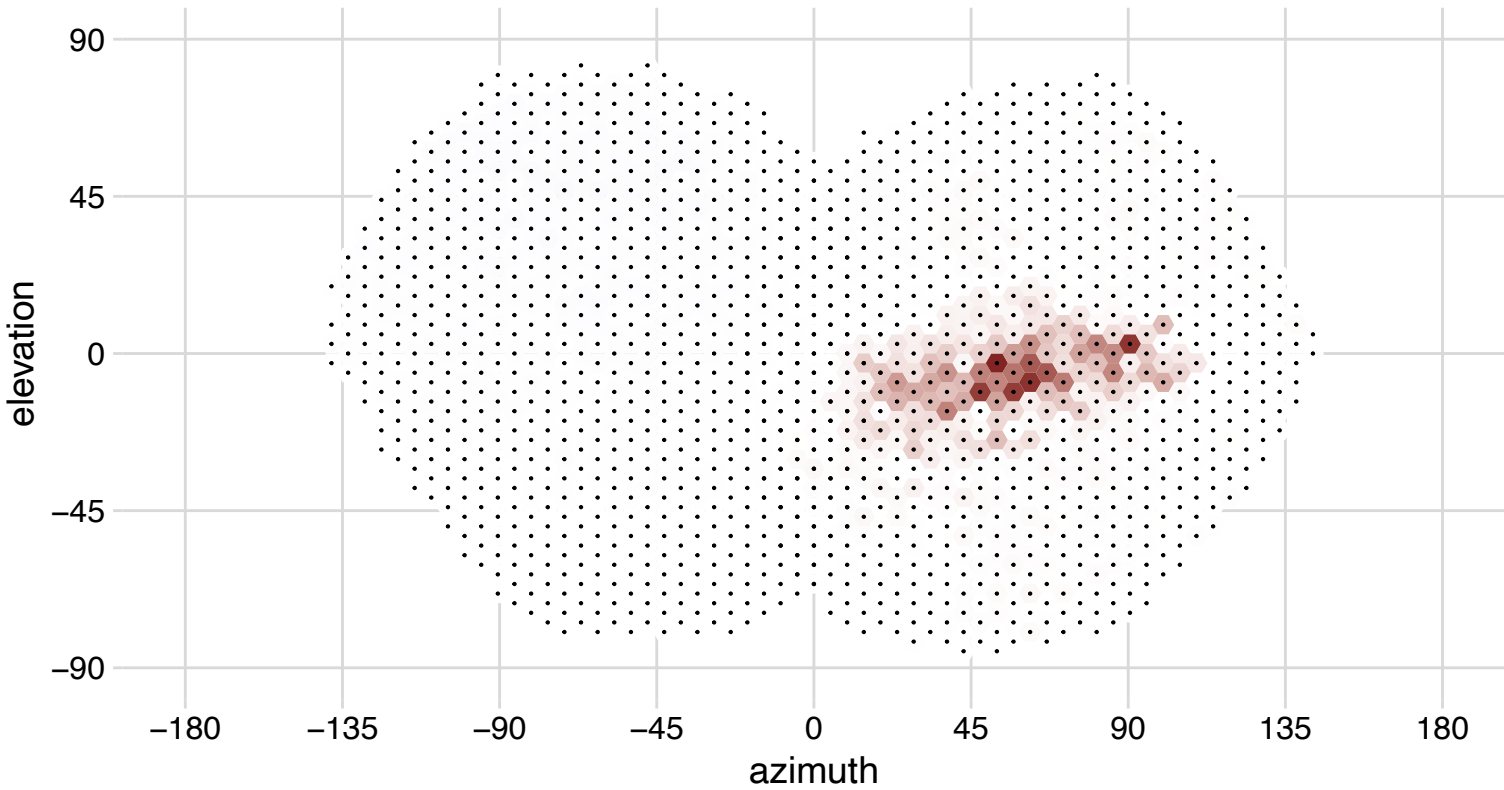

# ER3a\_ad 720575940619103142

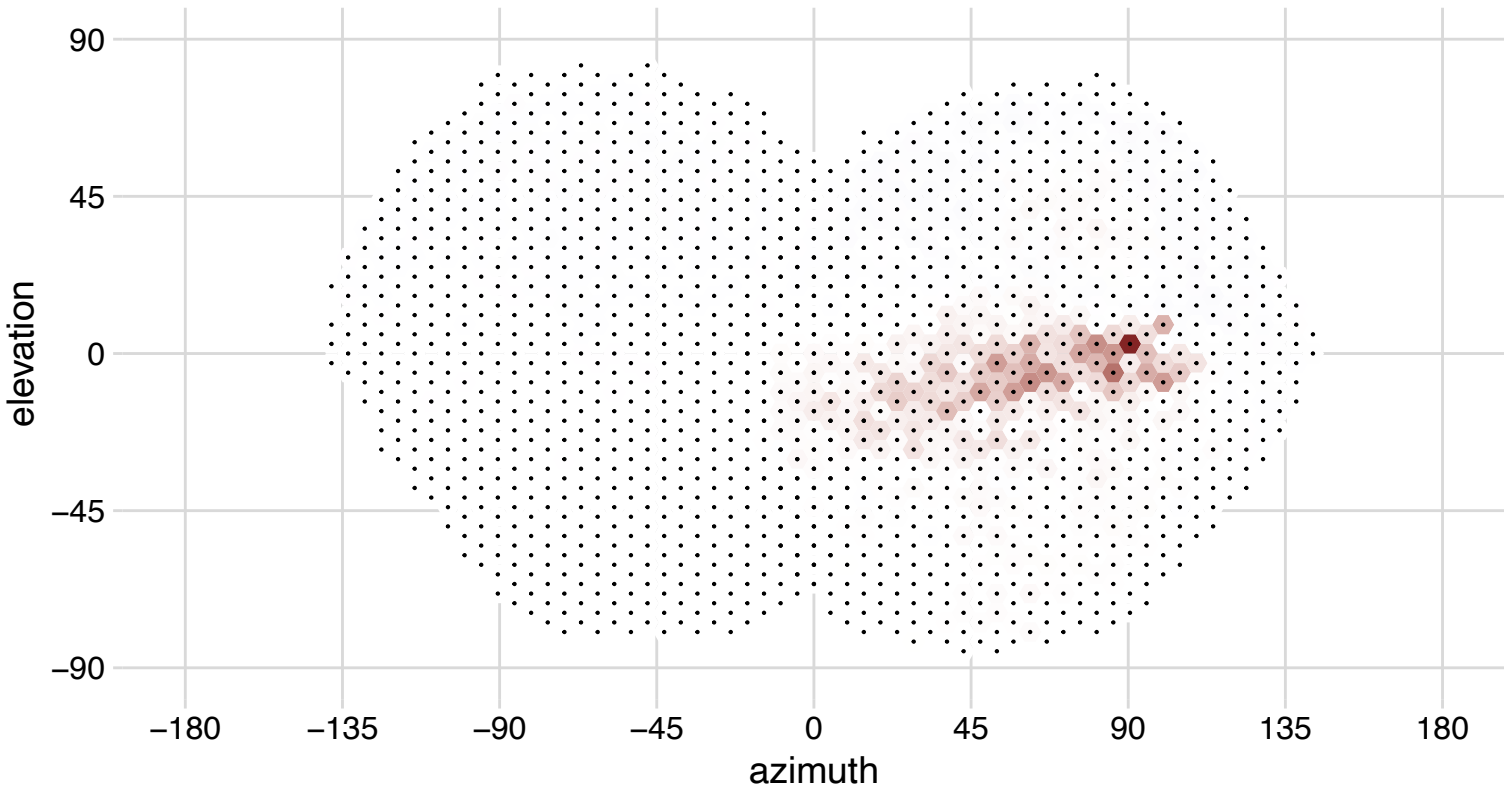

**ER3a\_ad 720575940620880007**

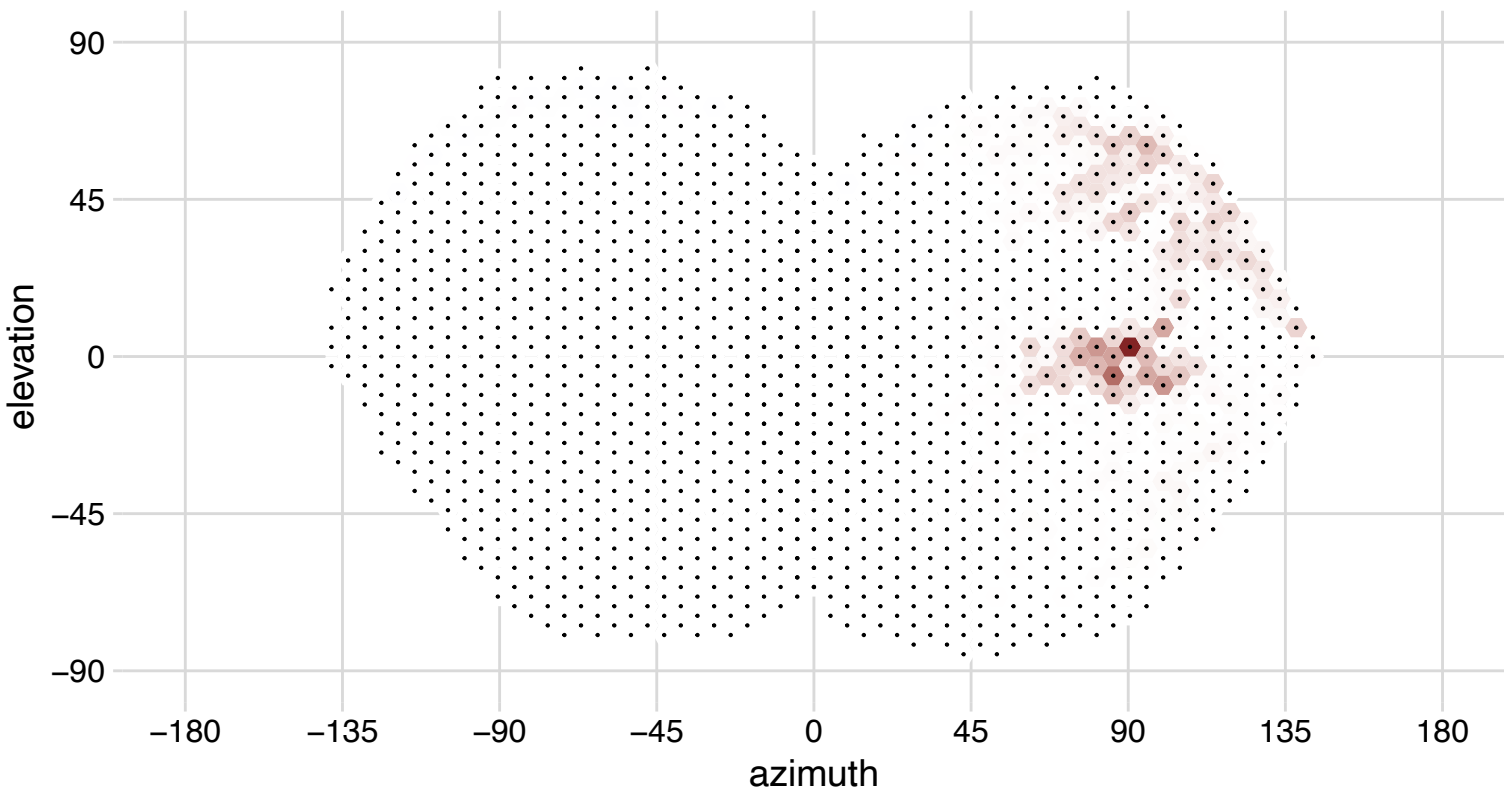

# ER3a\_ad 720575940621584068

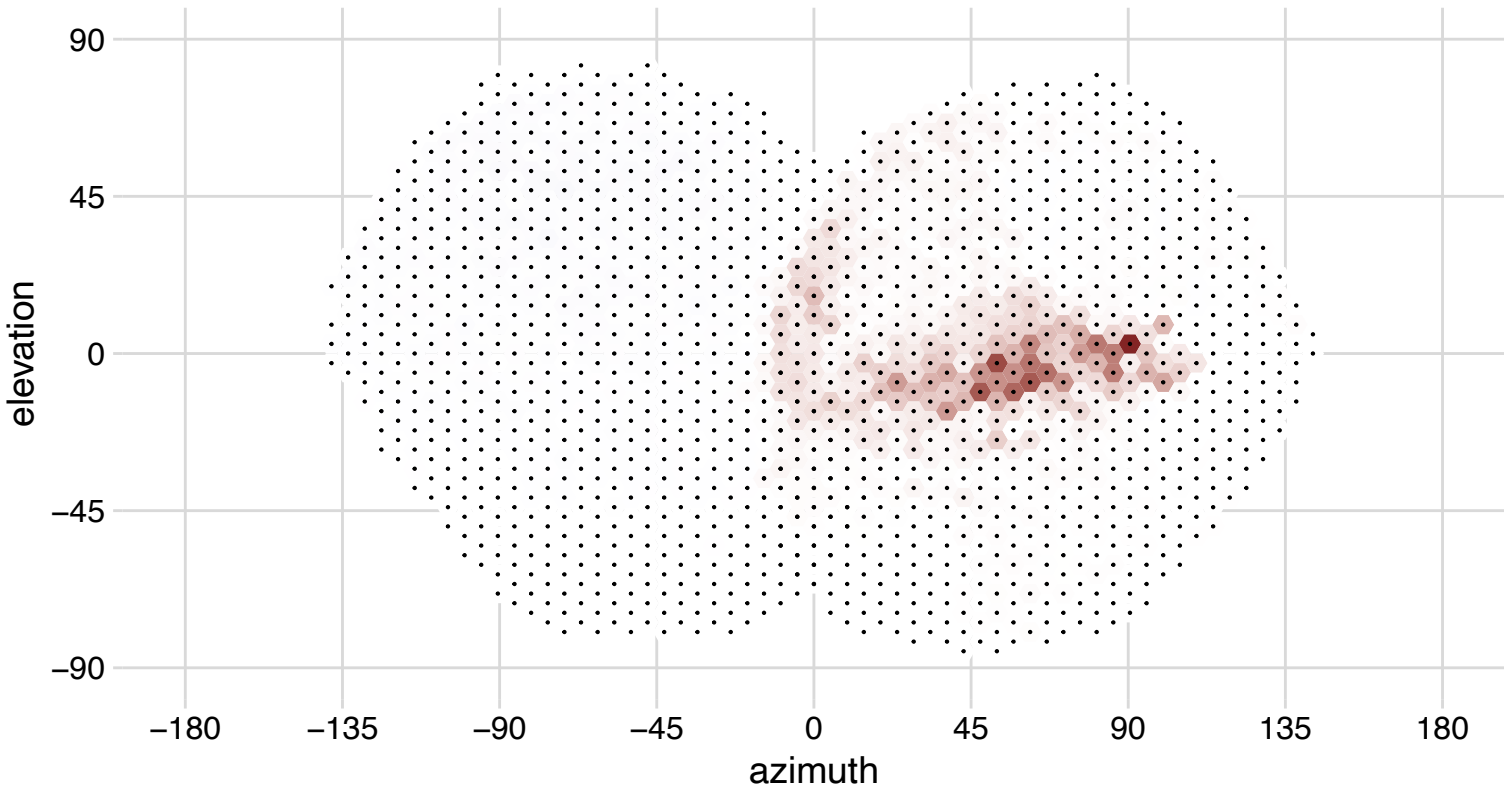

# ER3a\_ad 720575940622227550

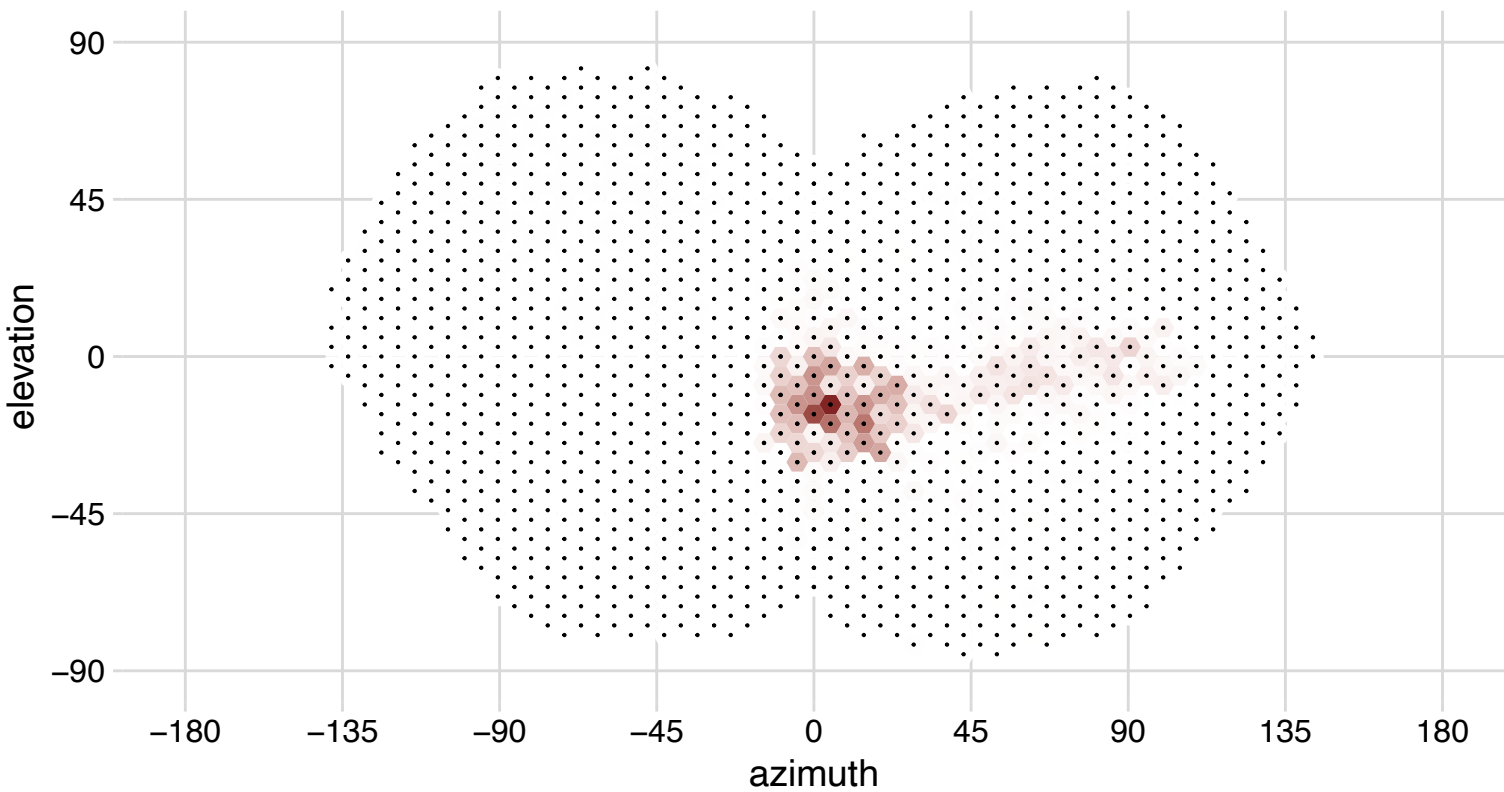



# ER3a\_ad 720575940622991252

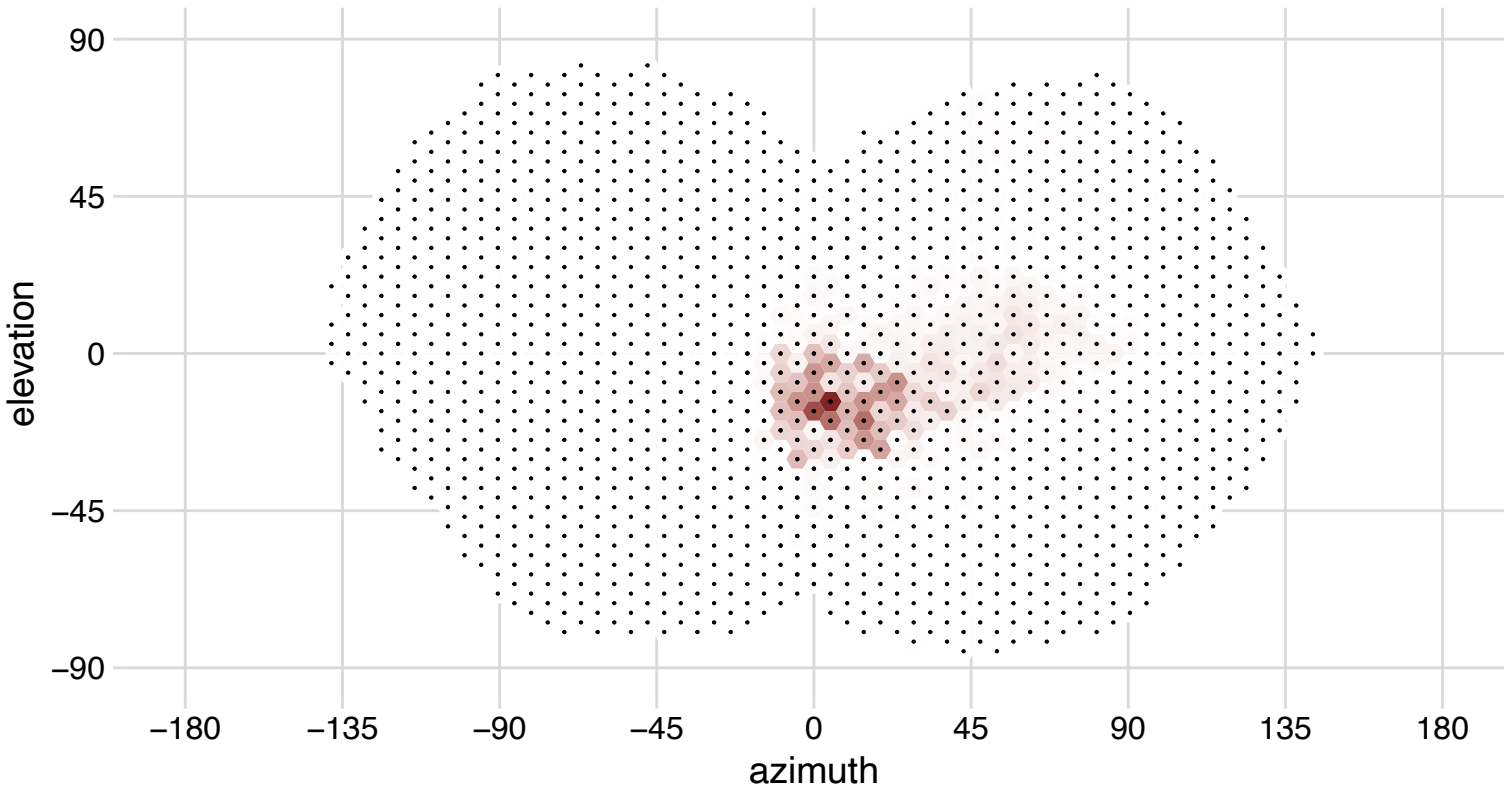

# ER3a\_ad 720575940624150664

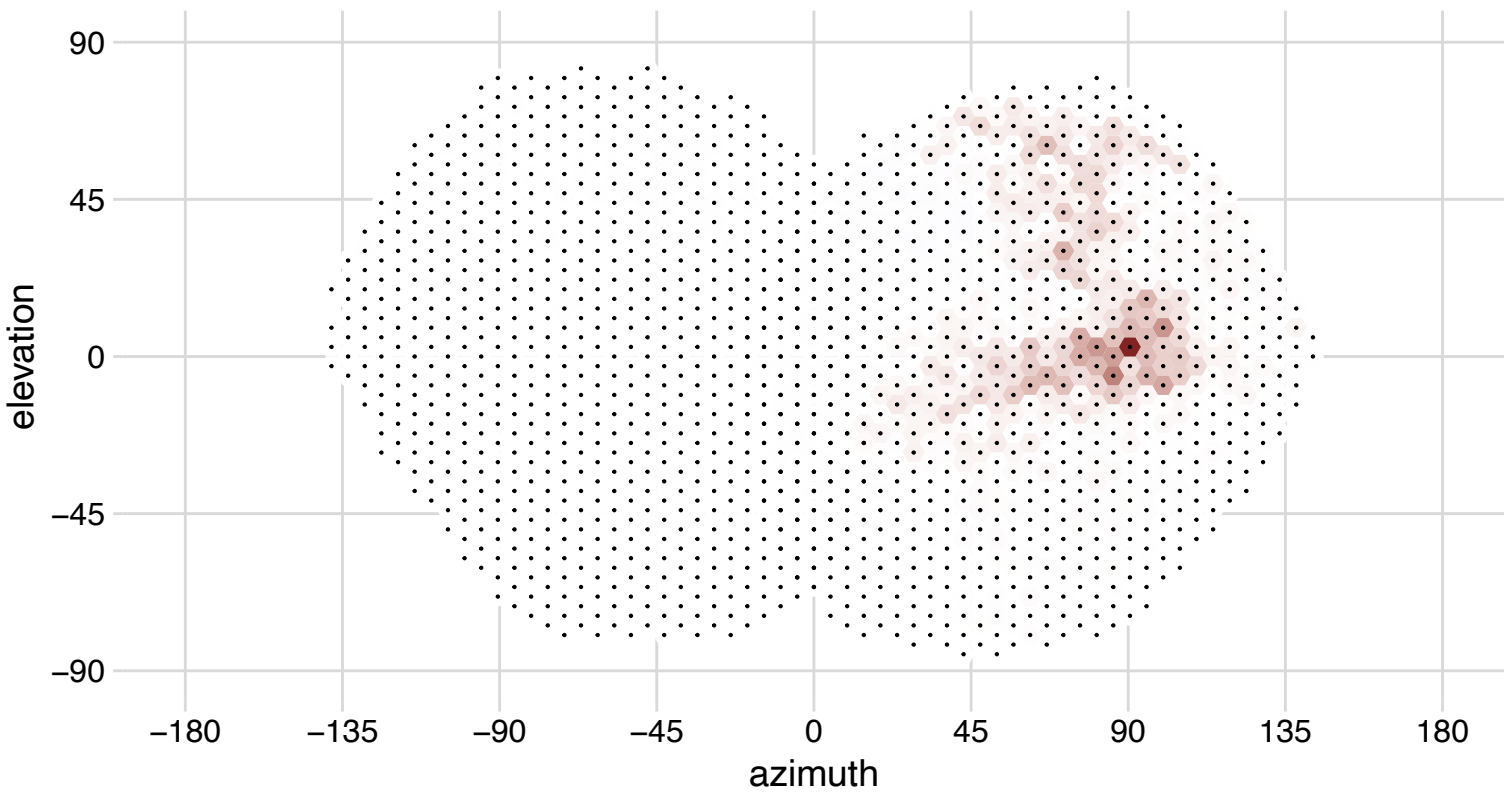

# ER3a\_ad 720575940626291998



**ER3a\_ad 720575940628093895**

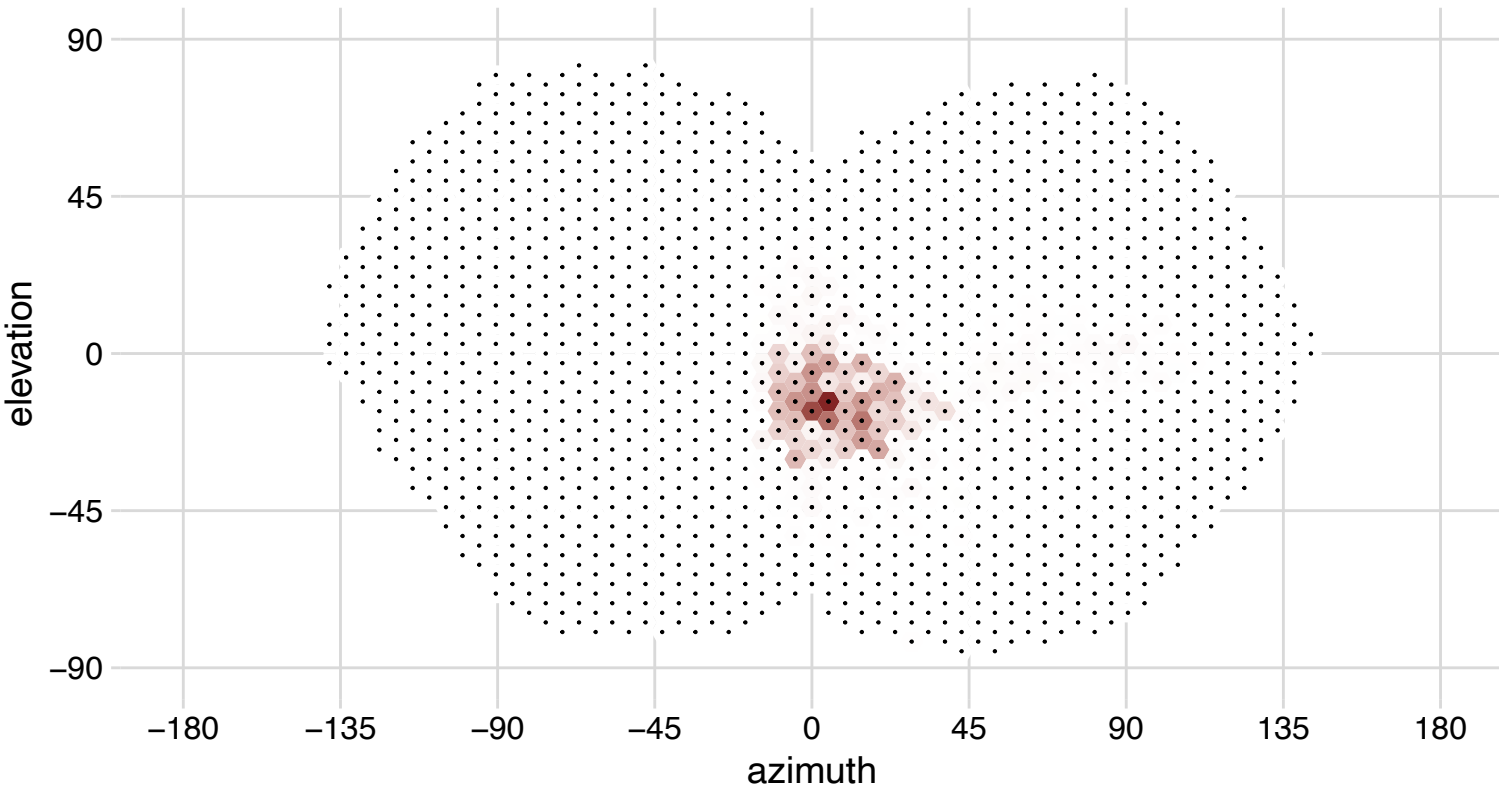

**ER3a\_ad 720575940639209461**

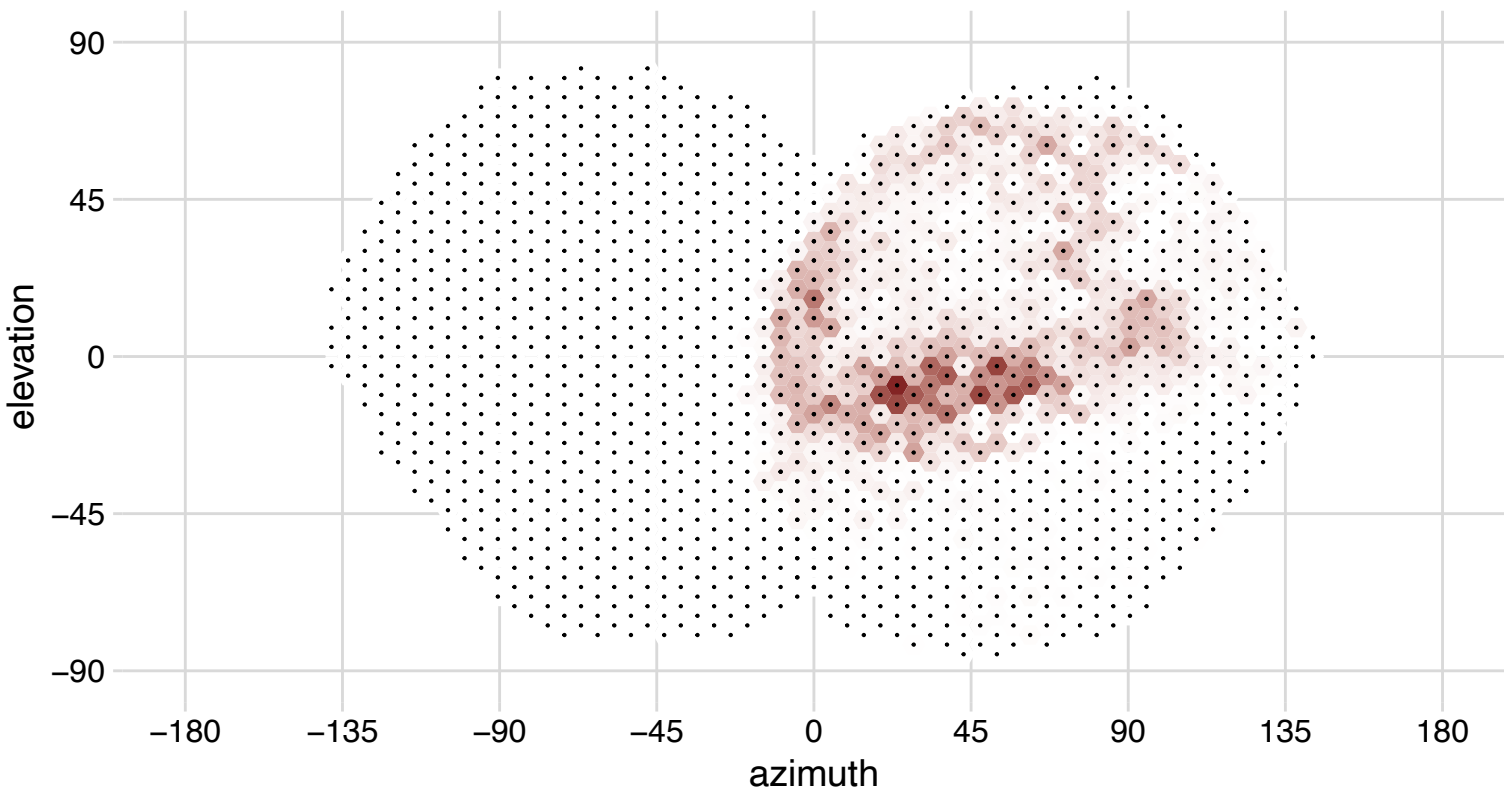

**ER3d\_a 720575940617187329**

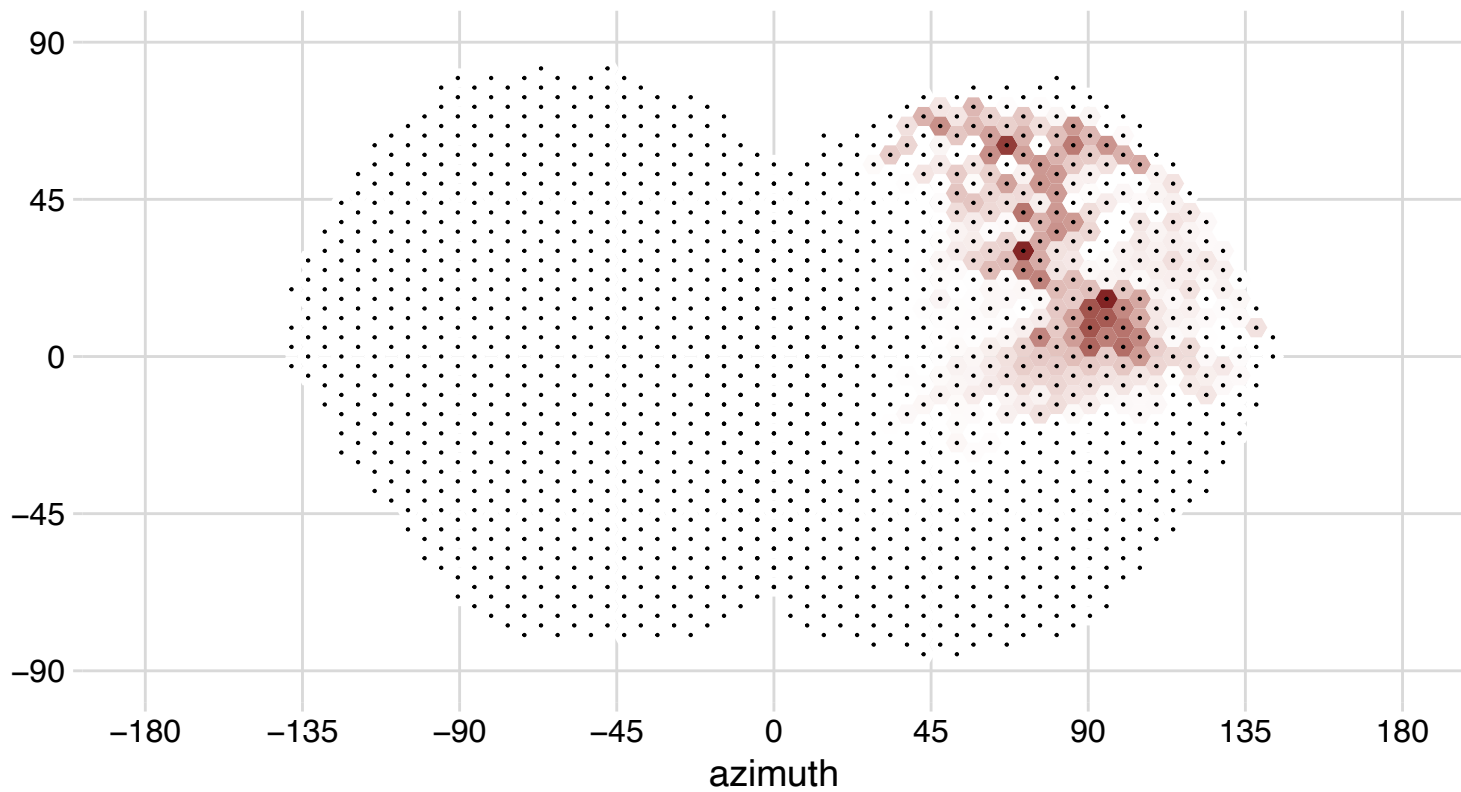

**ER3d\_a 720575940619767744**

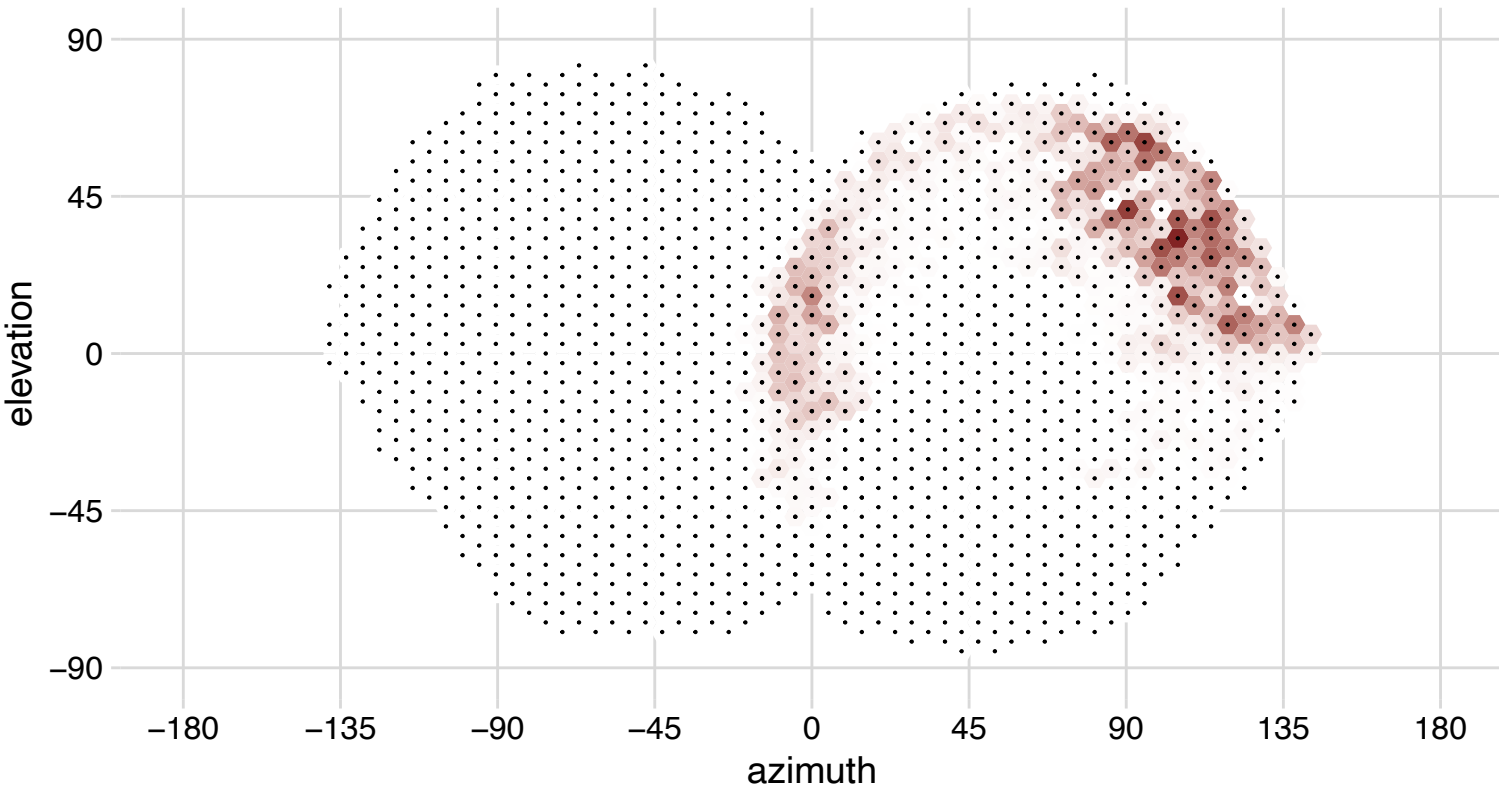

**ER3d\_a 720575940619955583**

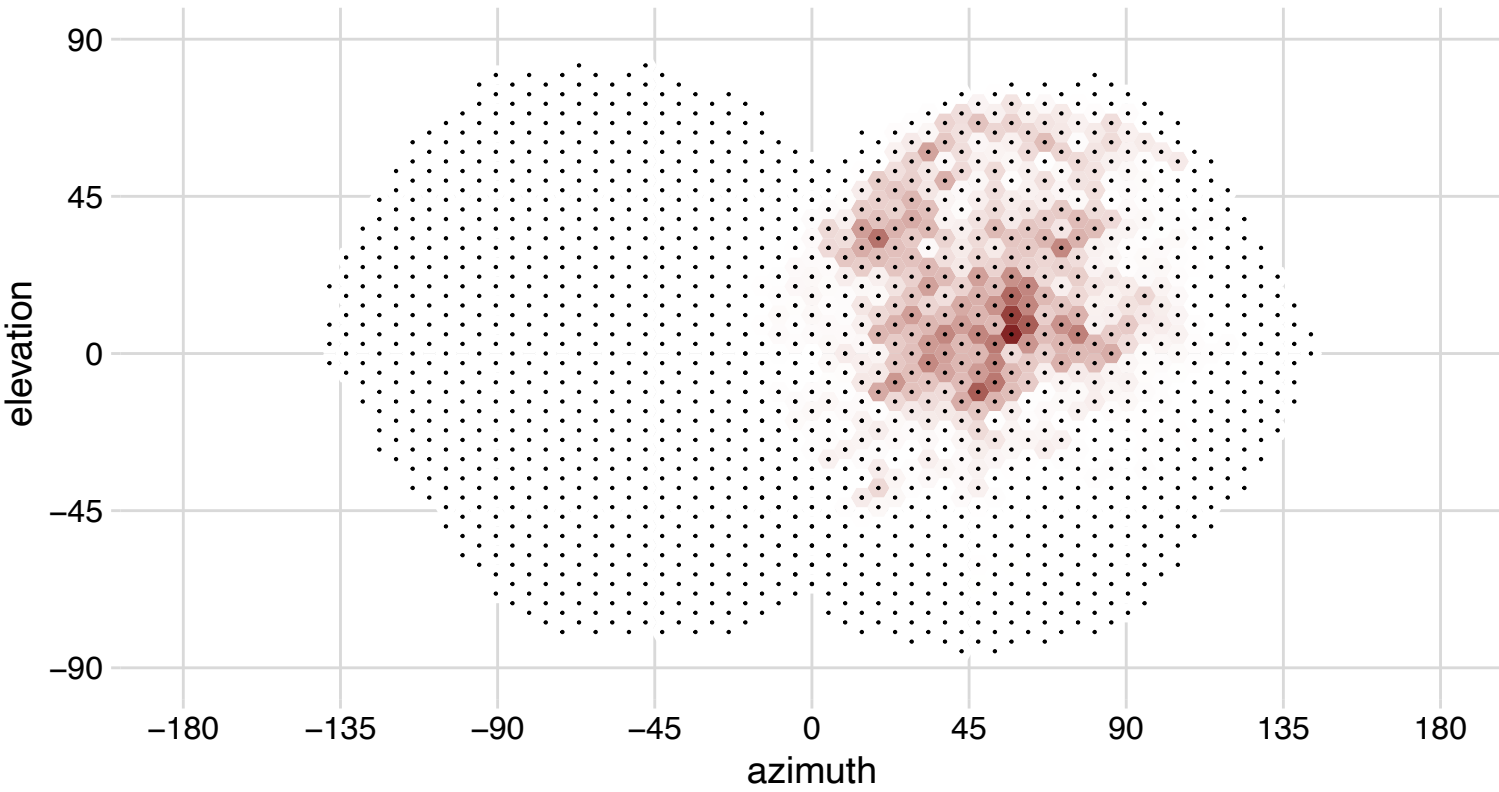



**ER3d\_a 720575940621155092**

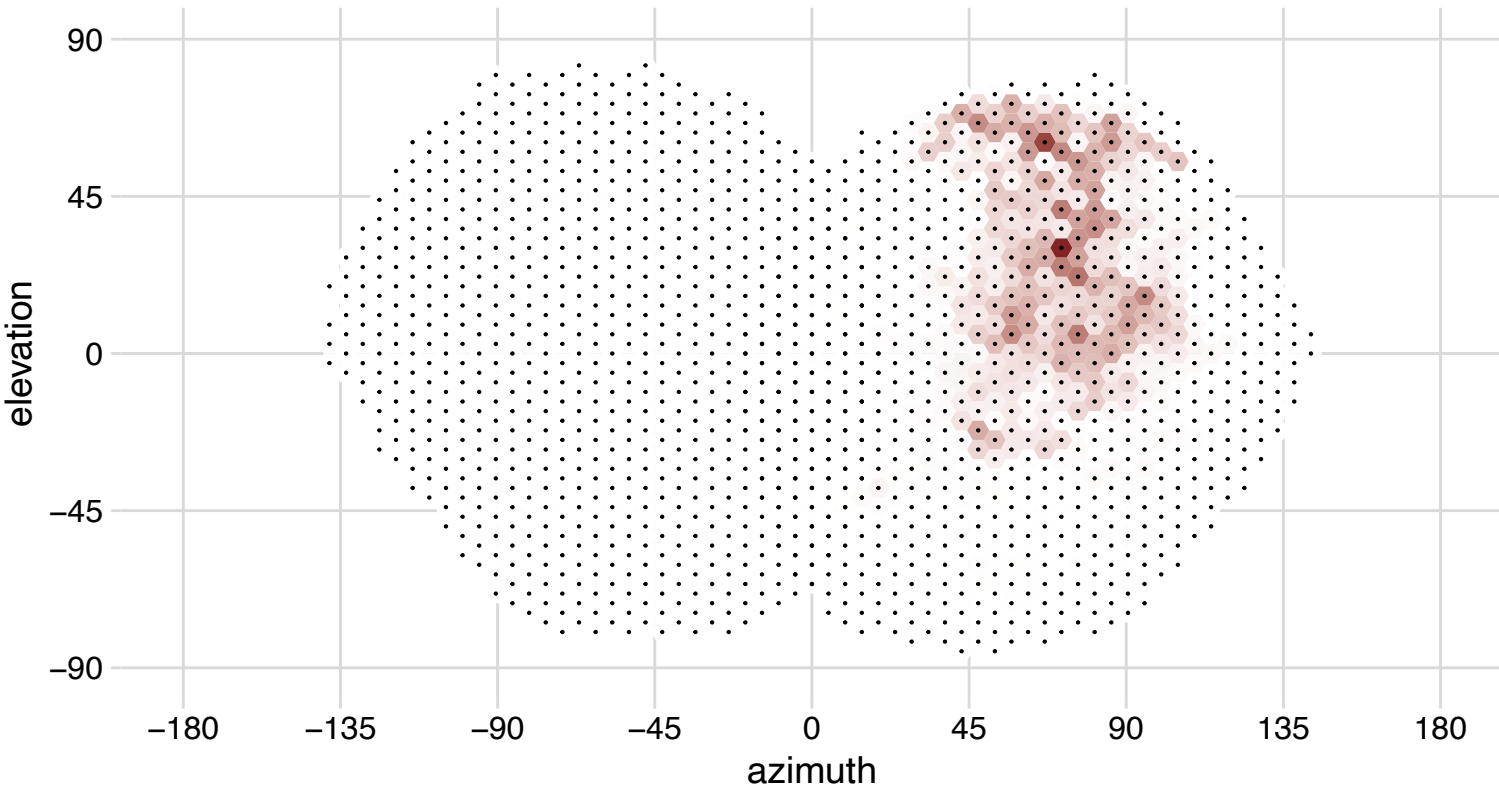

**ER3d\_a 720575940624139817**

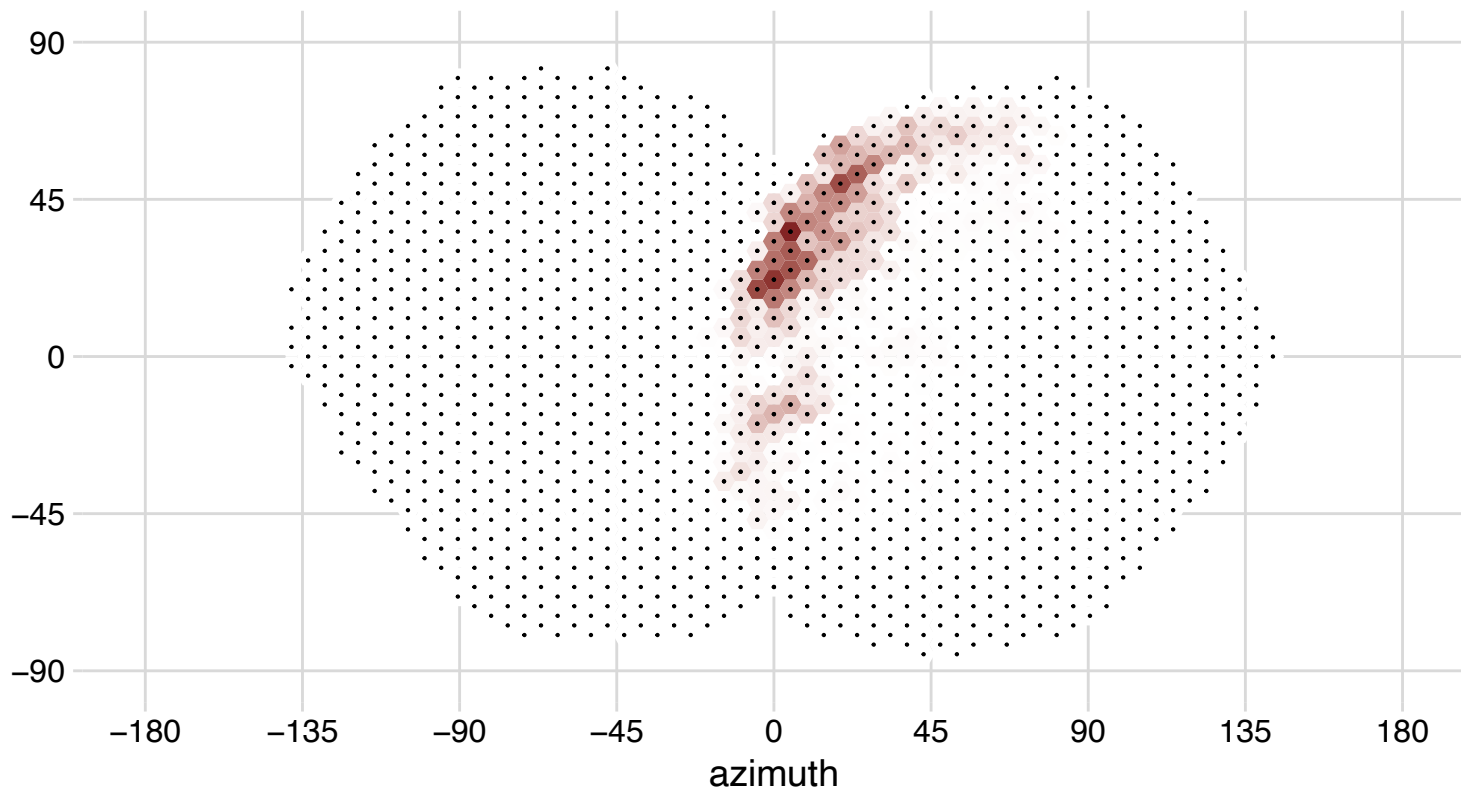

**ER3d\_a 720575940626228230**

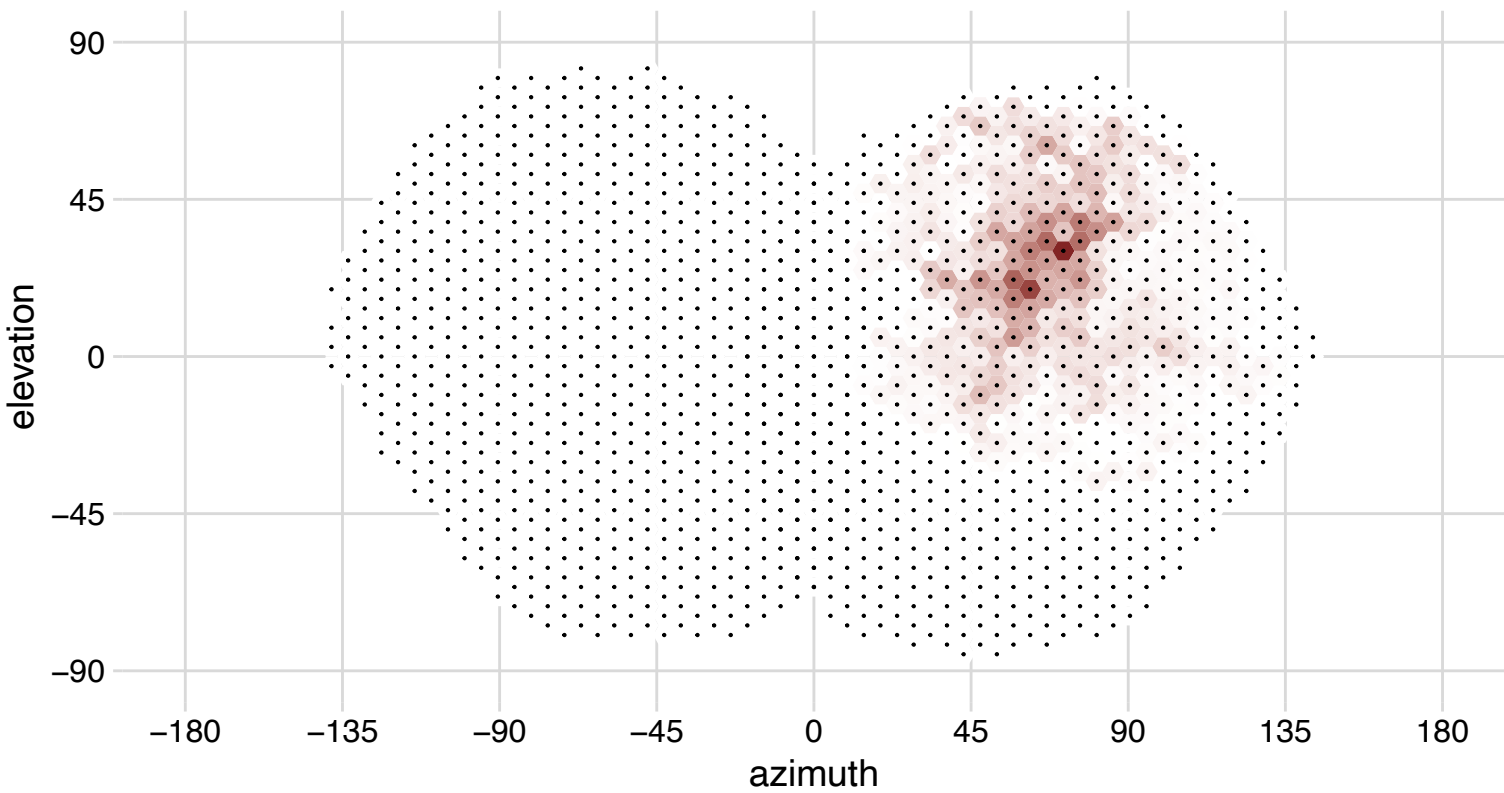

**ER3d\_a 720575940629244166**

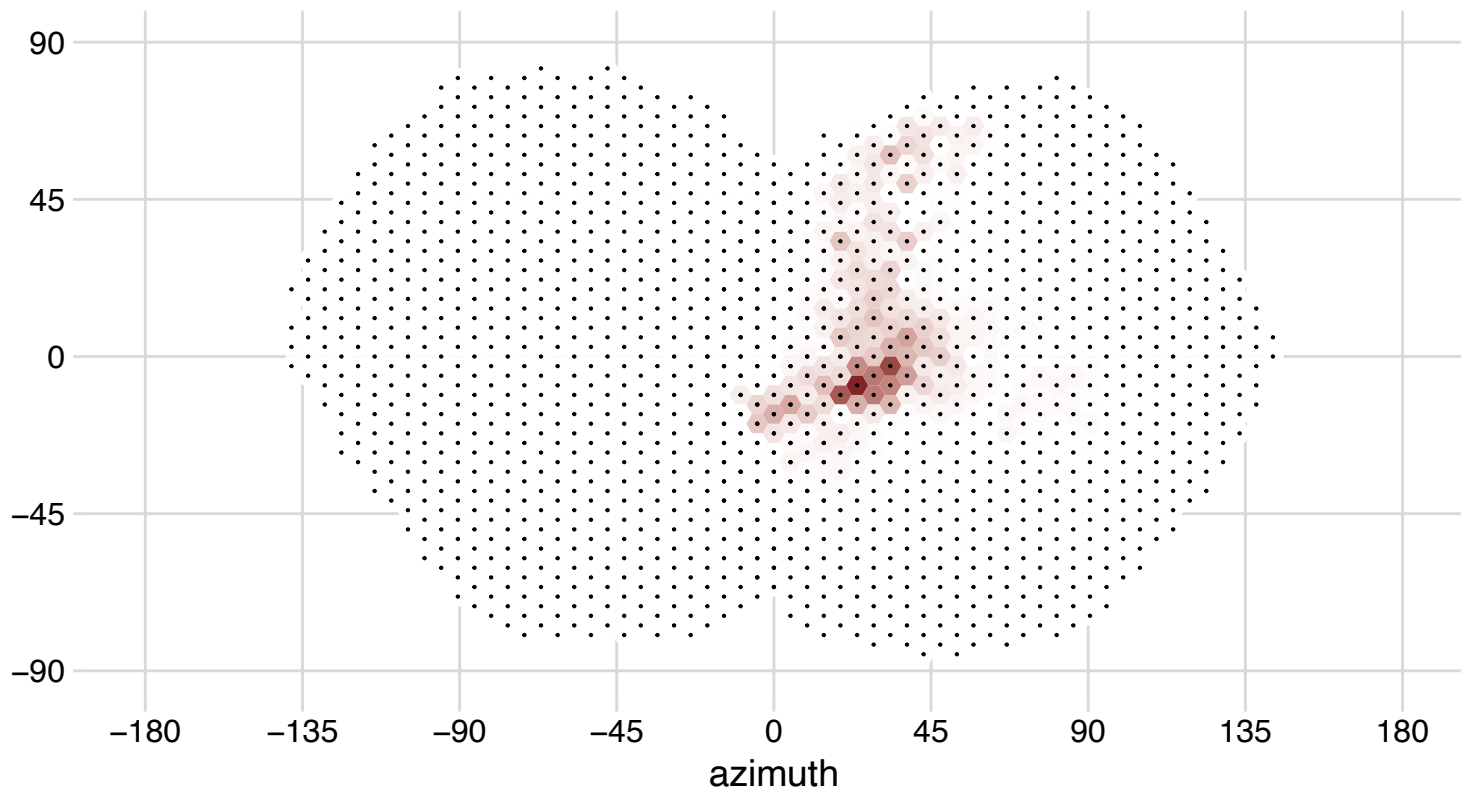

**ER3d\_a 720575940629711376**

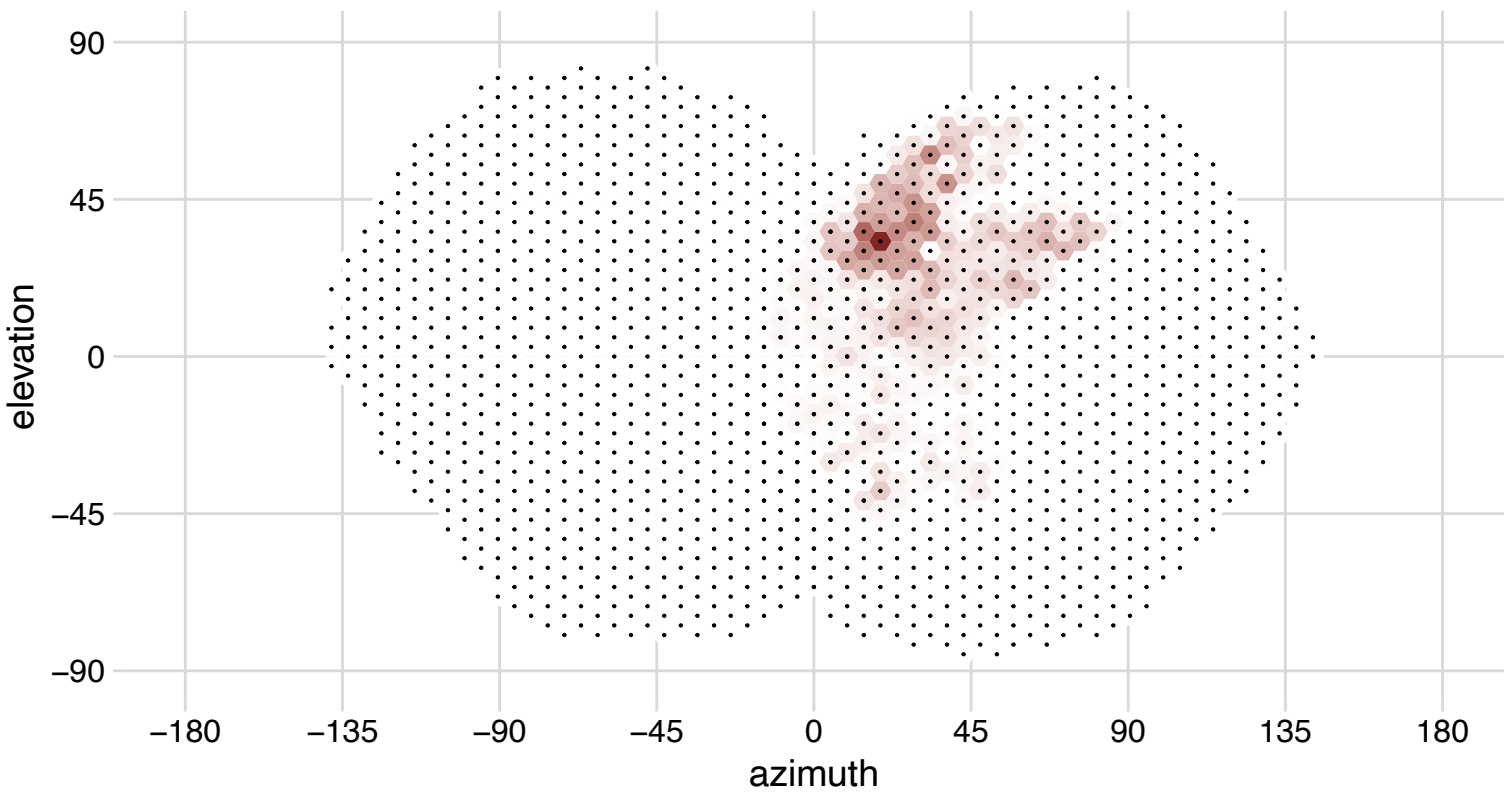

**ER3d\_a 720575940632602850**

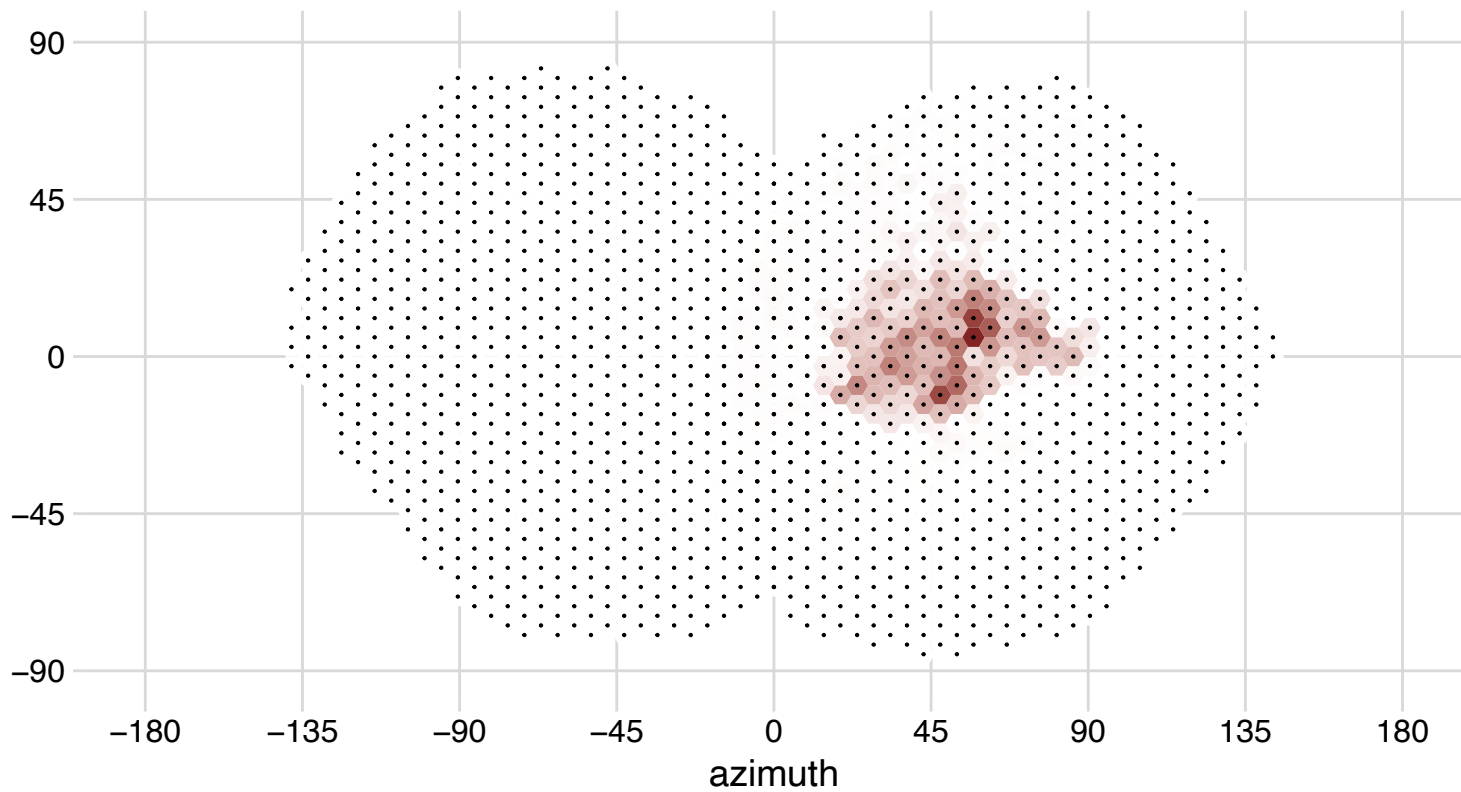

**ER3d\_a 720575940633631789**

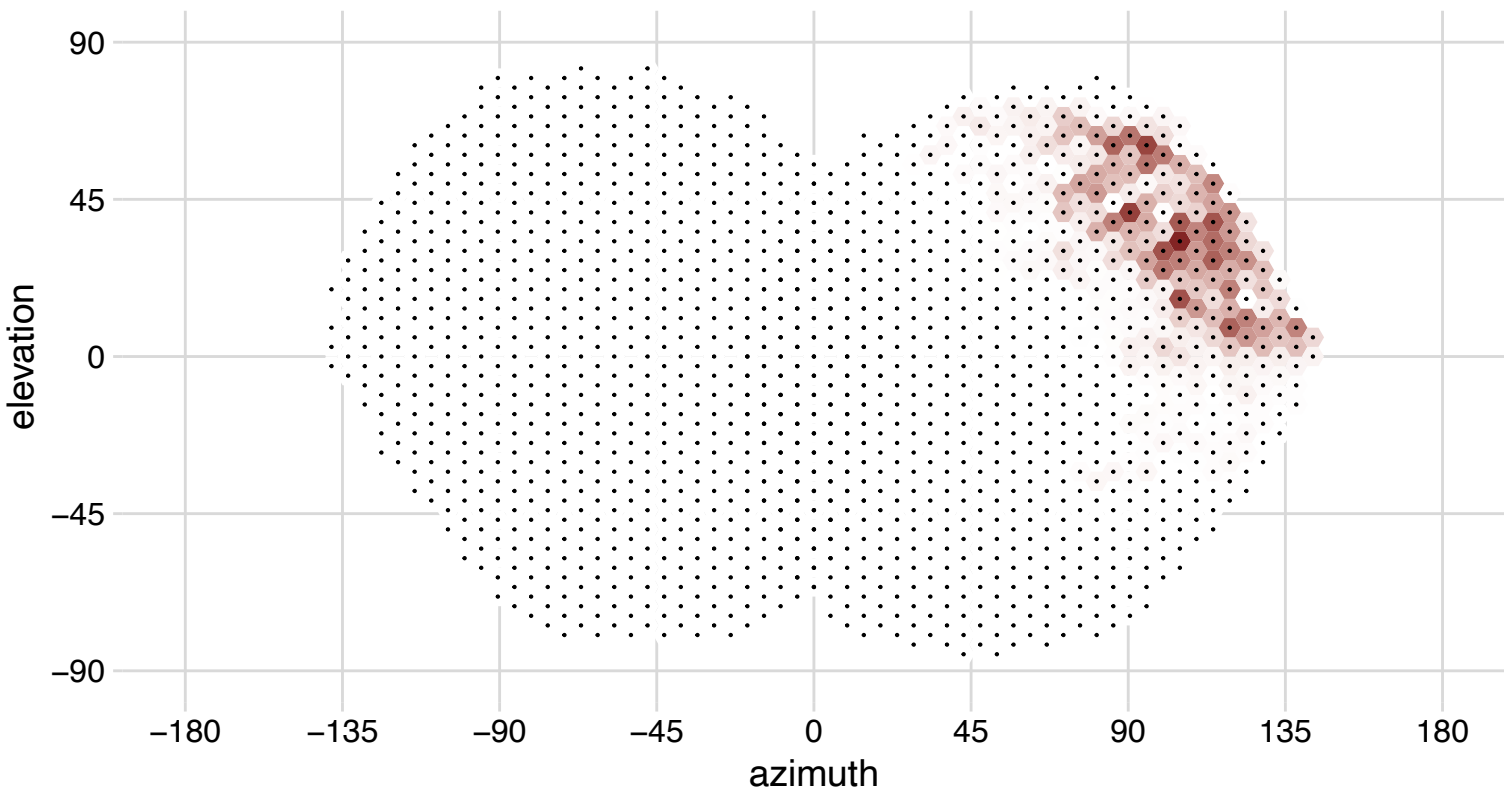

**ER3d\_a 720575940646260334**

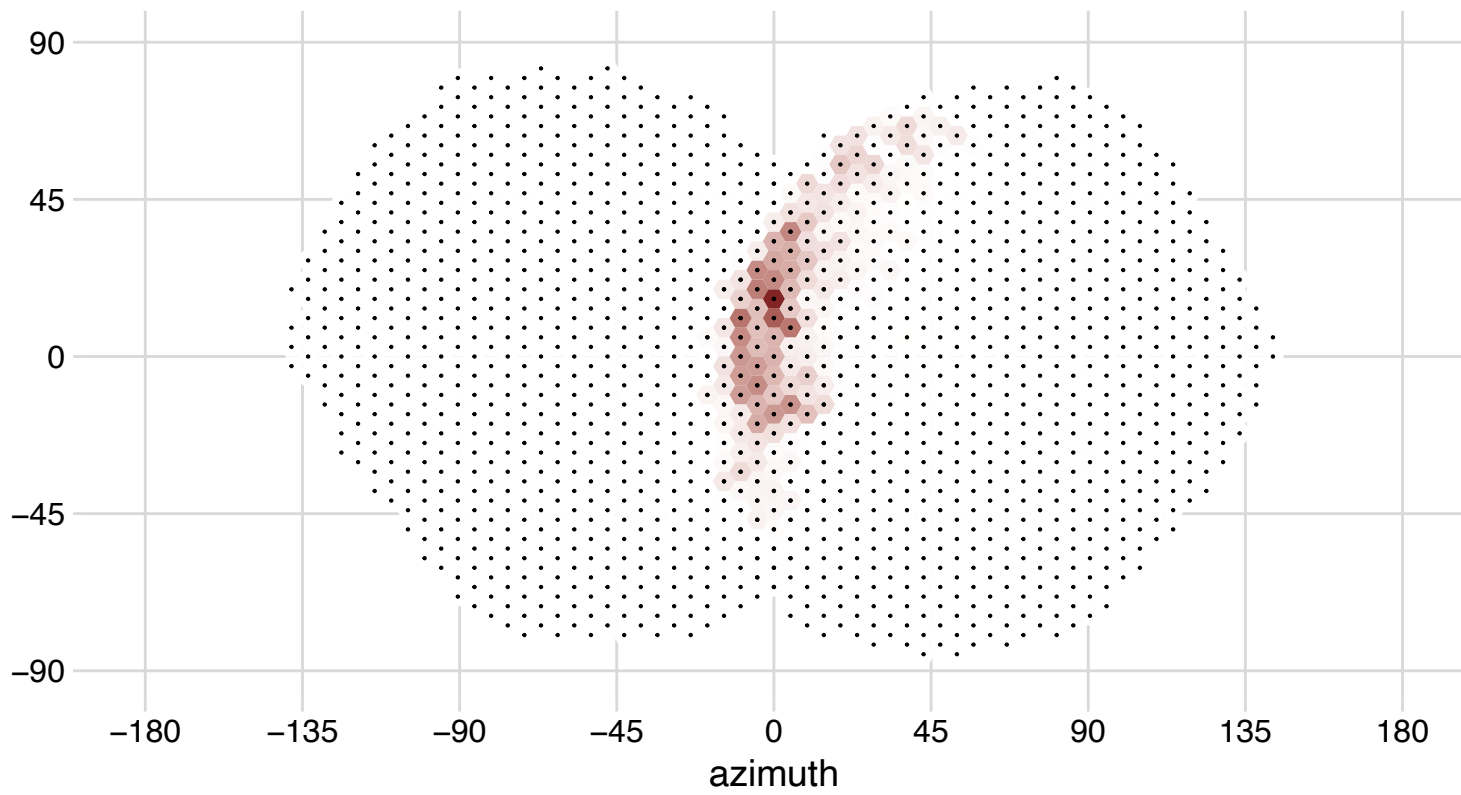



**ER3d\_b 720575940616445250**

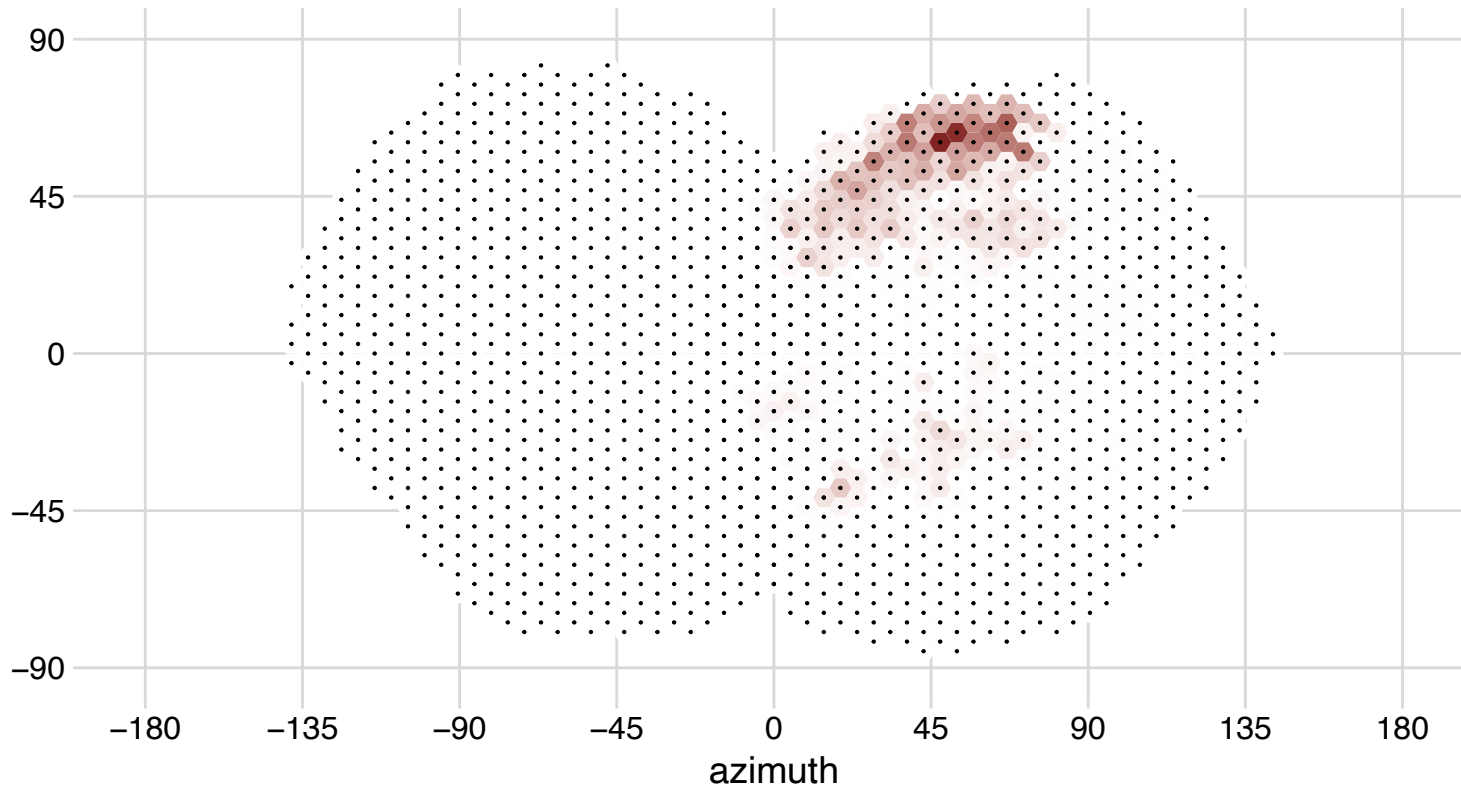

**ER3d\_b 720575940619658111**

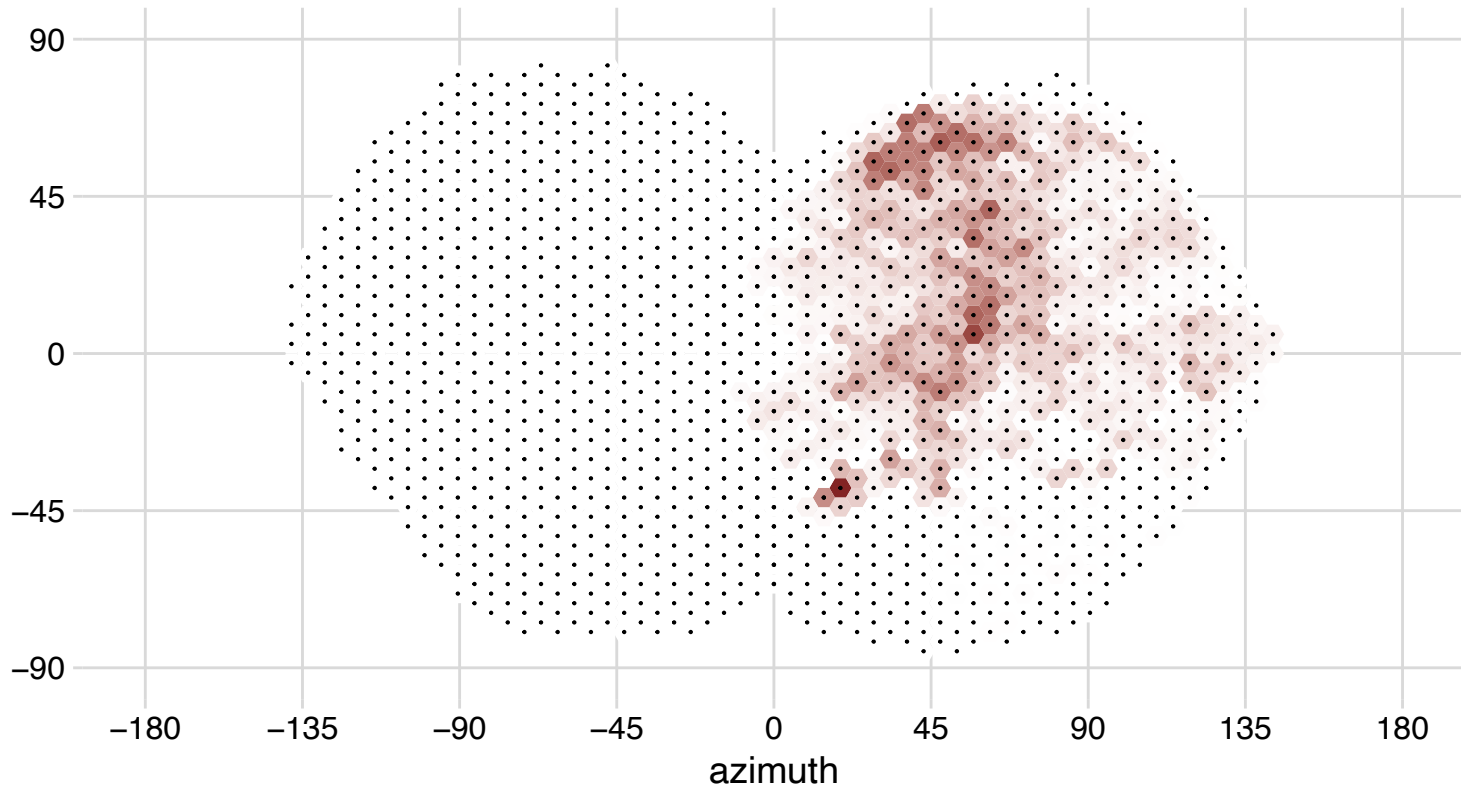

**ER3d\_b 720575940625218685**

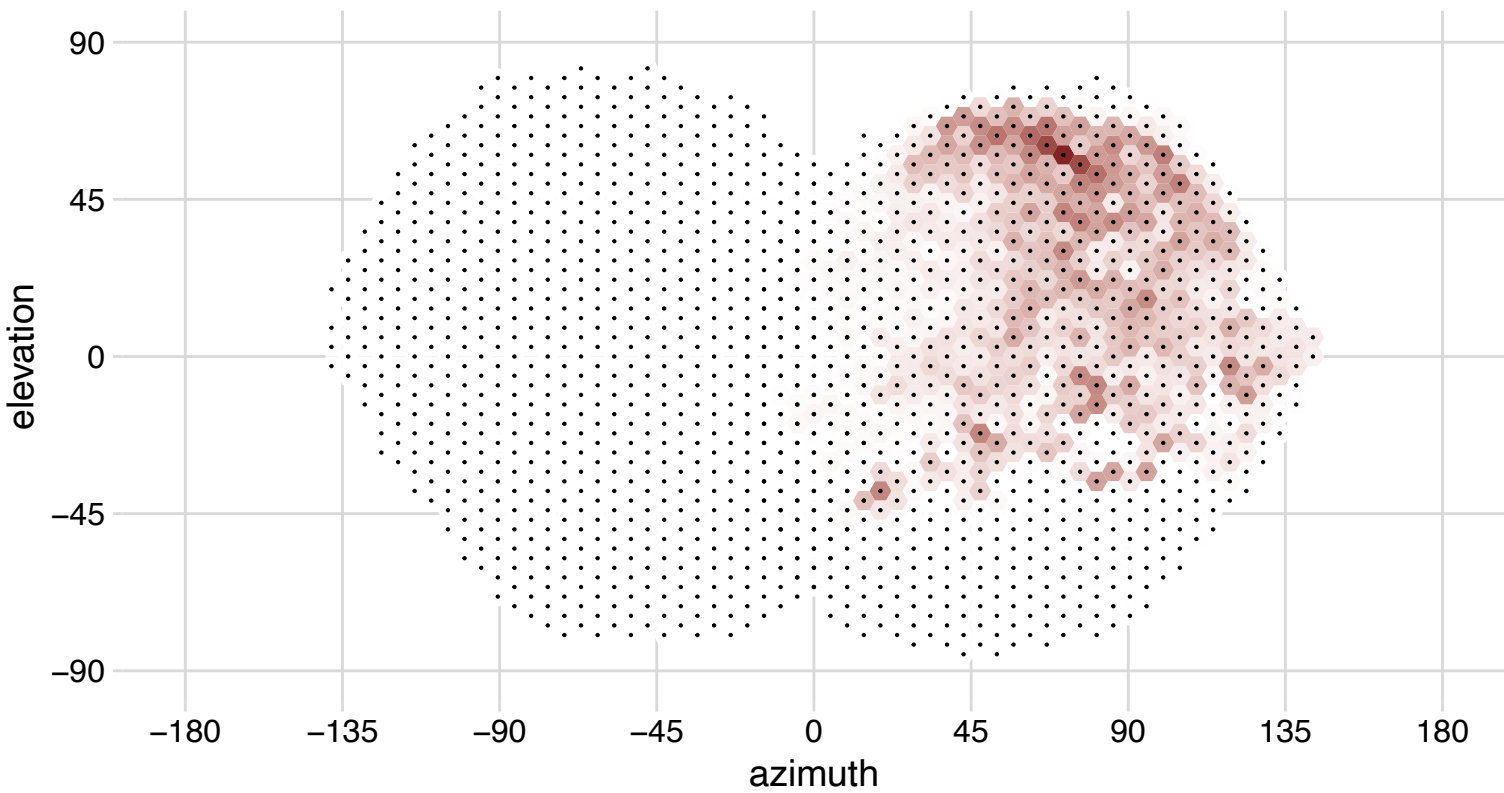

**ER3d\_b 720575940626827024**

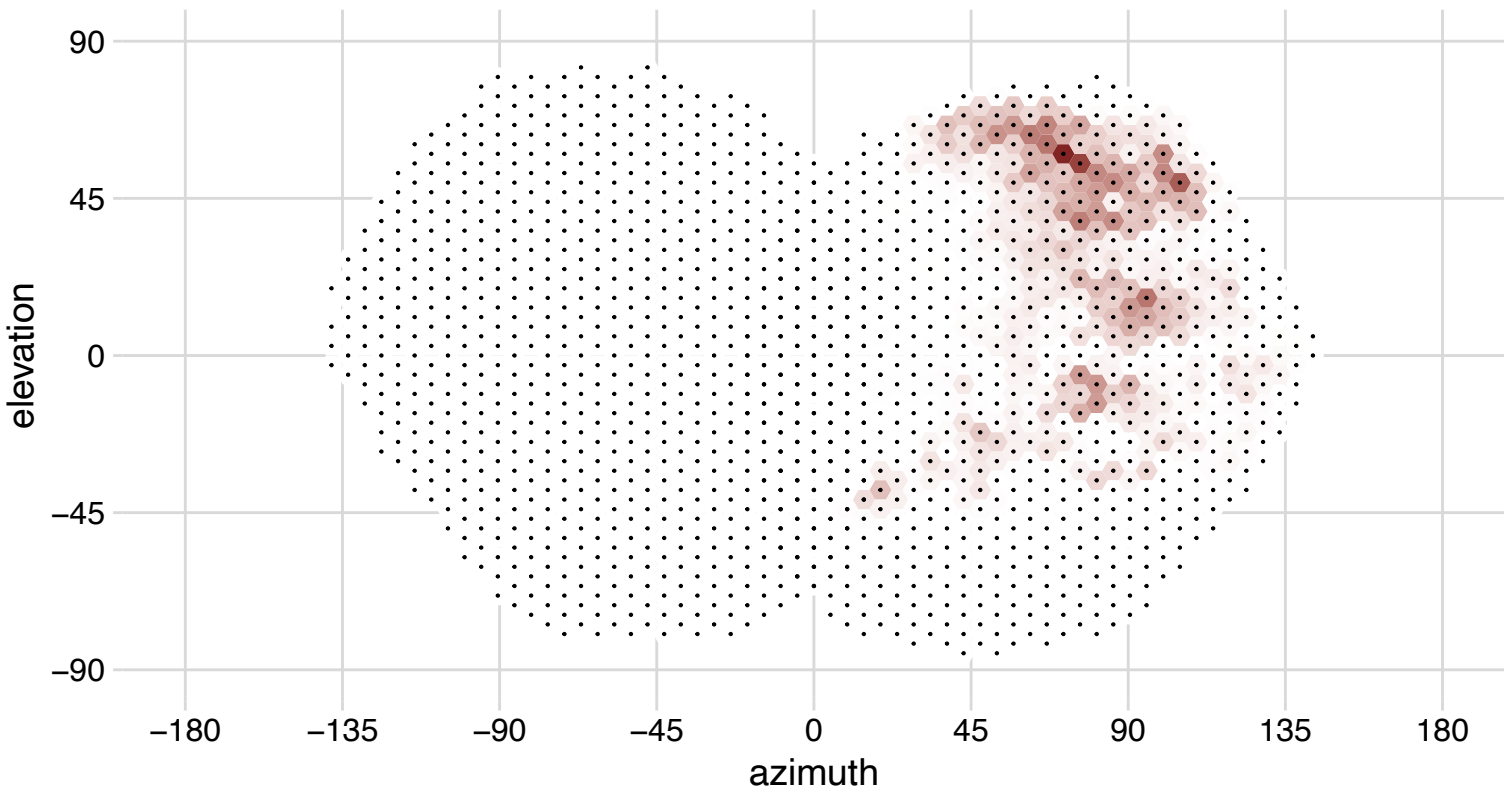

**ER3d\_b 720575940627299227**

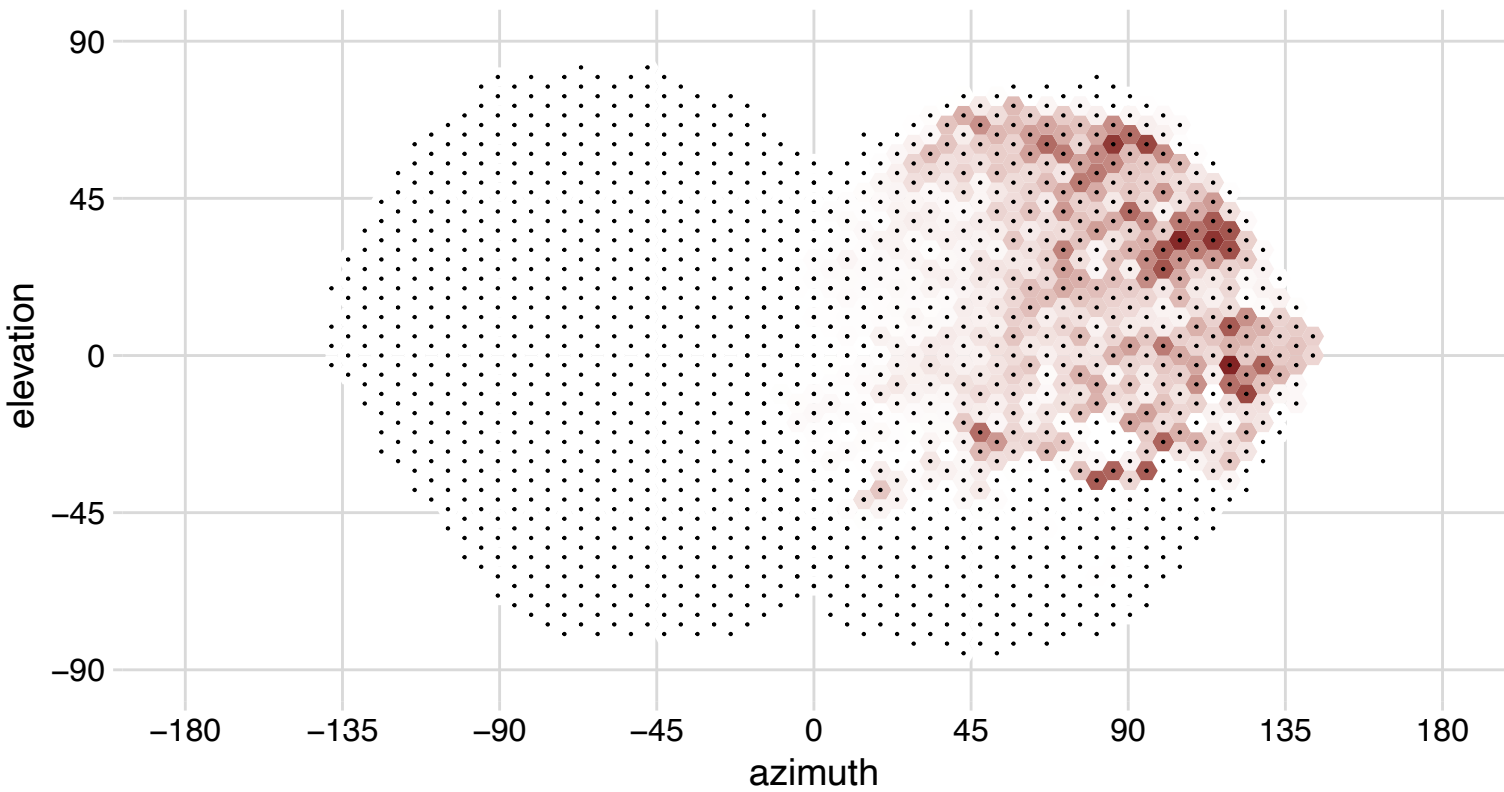

**ER3d\_b 720575940627299483**

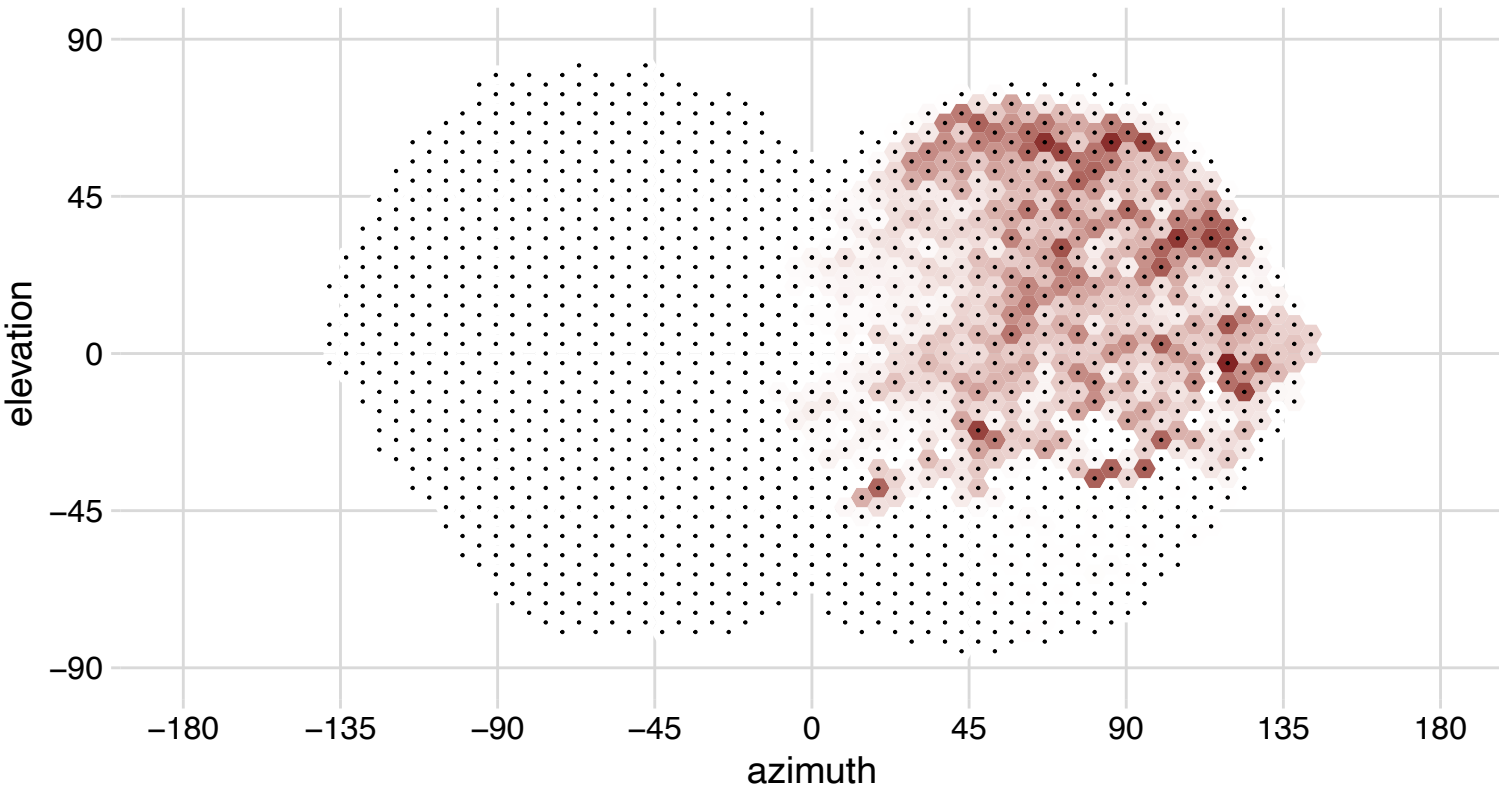

**ER3d\_b 720575940630755276**

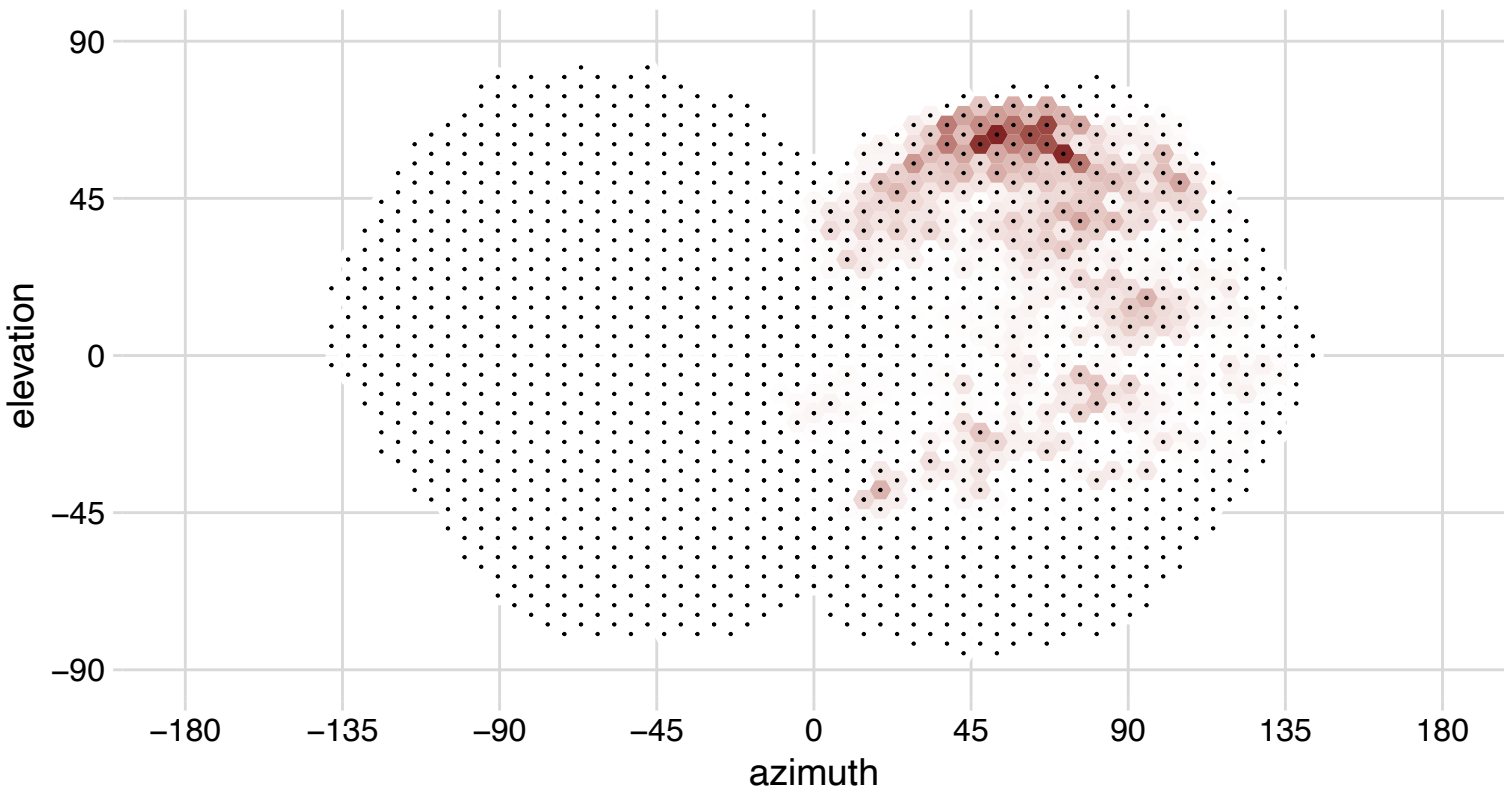

**ER3d\_c 720575940616205083**

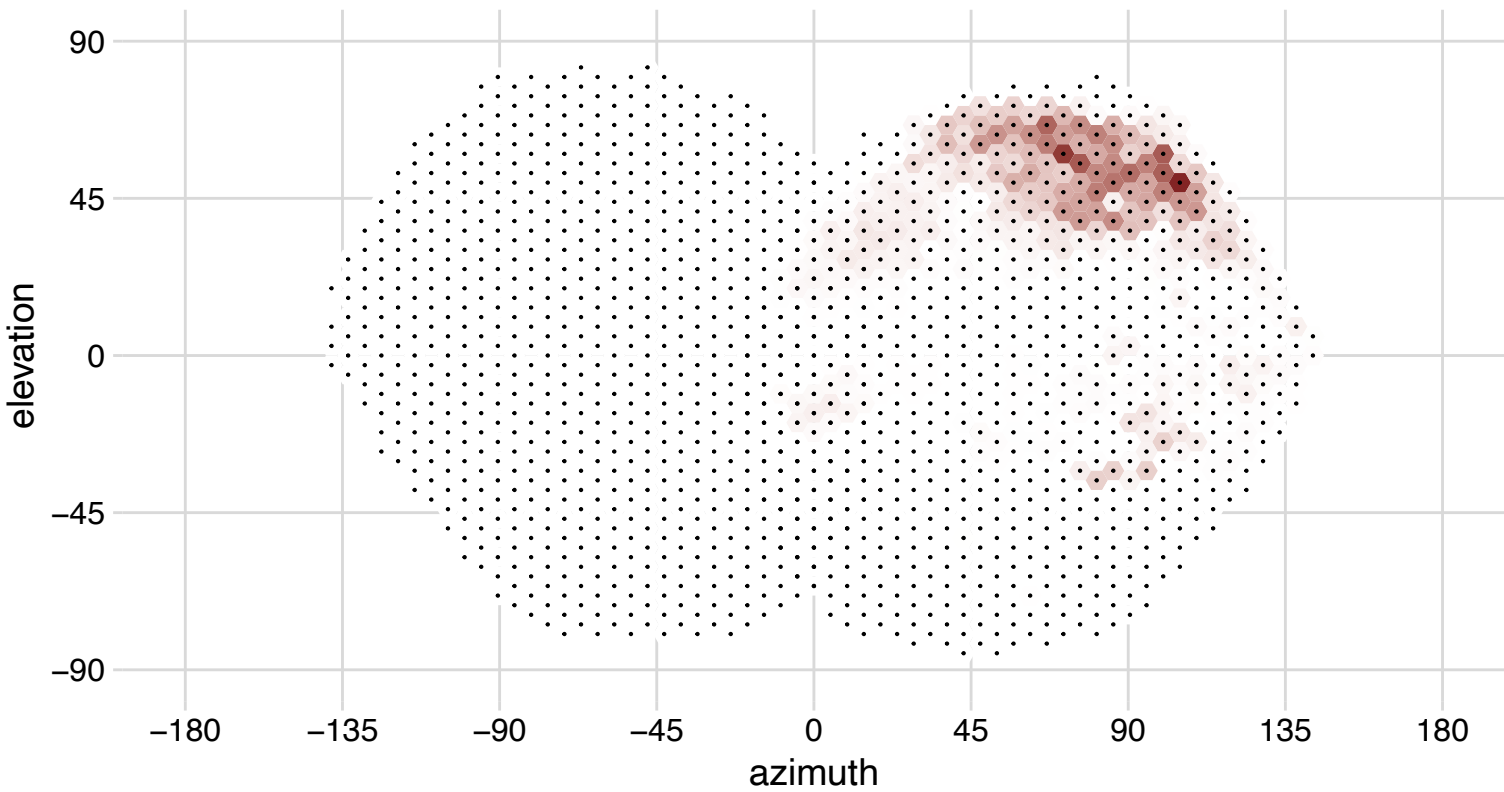



**ER3d\_c 720575940624783287**

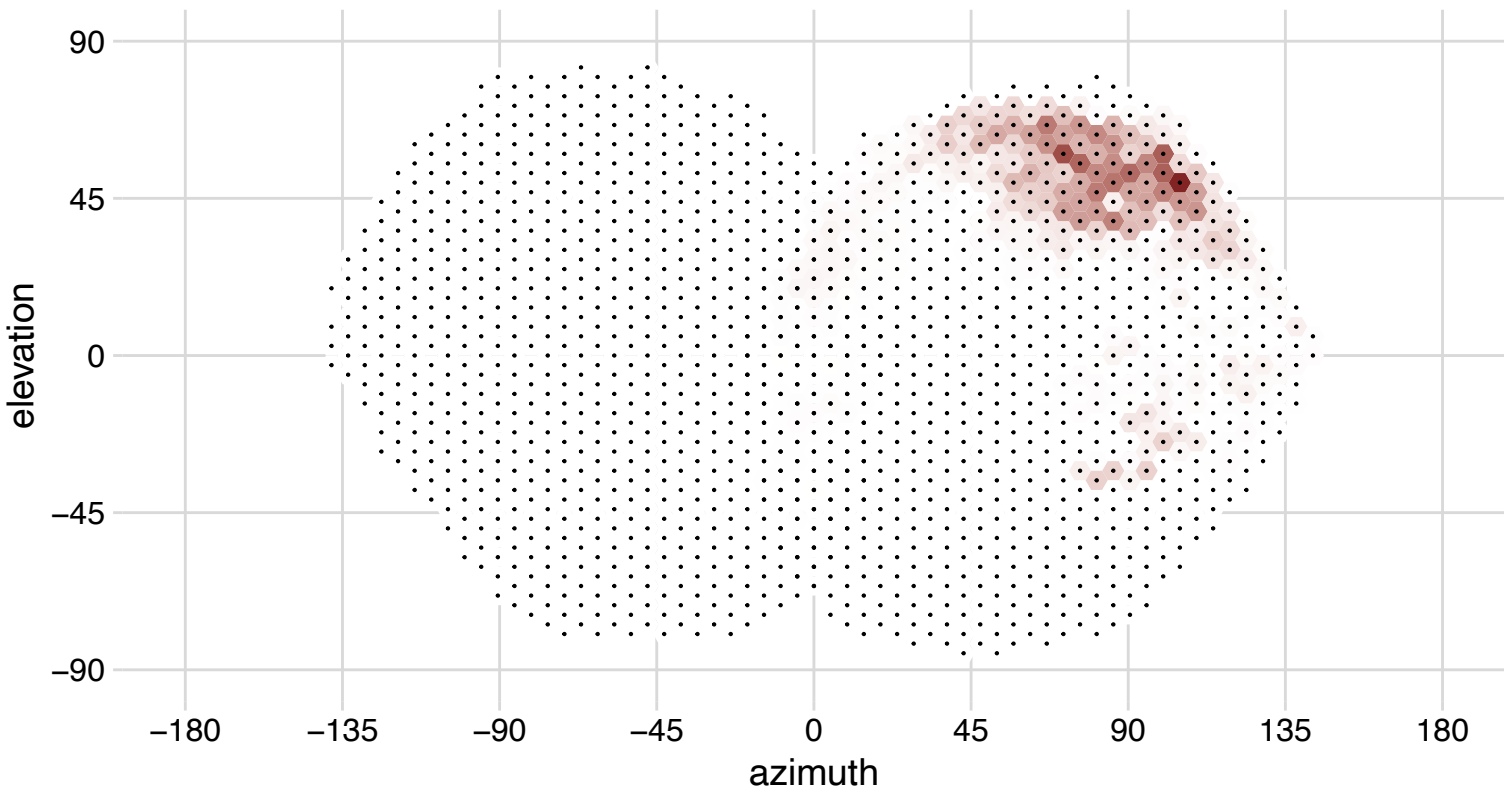

**ER3d\_c 720575940625613799**

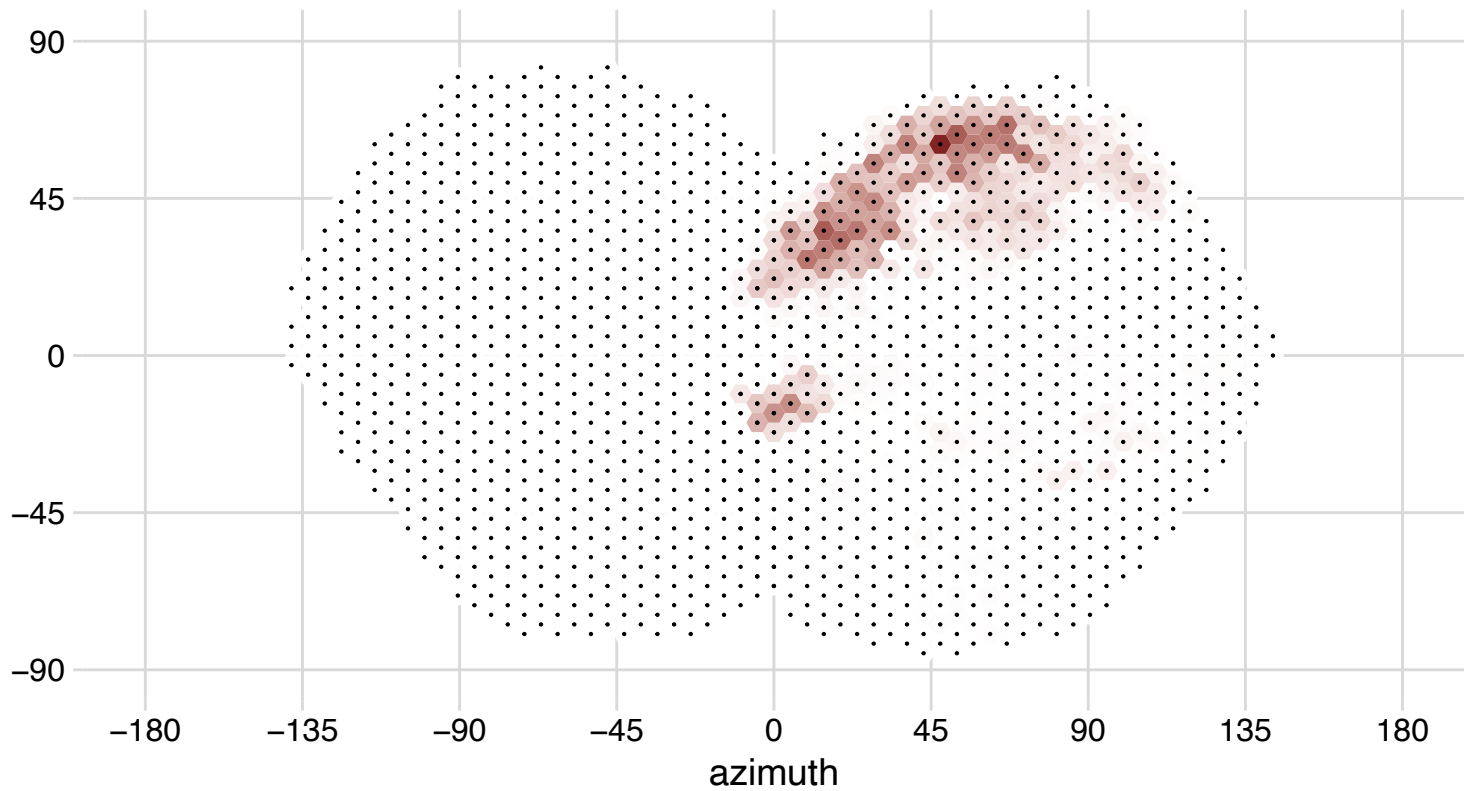

**ER3d\_c 720575940625749491**

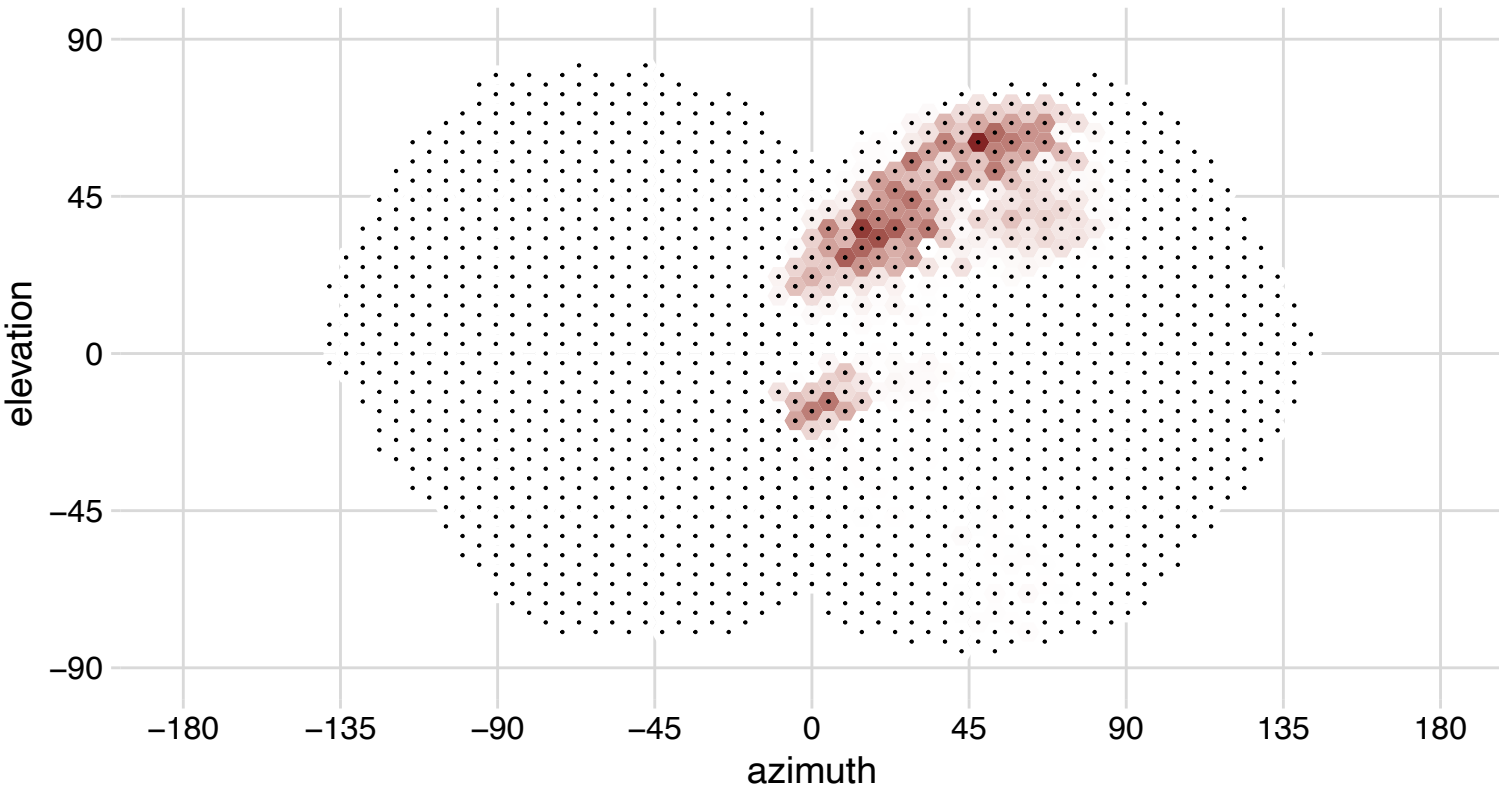

**ER3d\_c 720575940631042131**

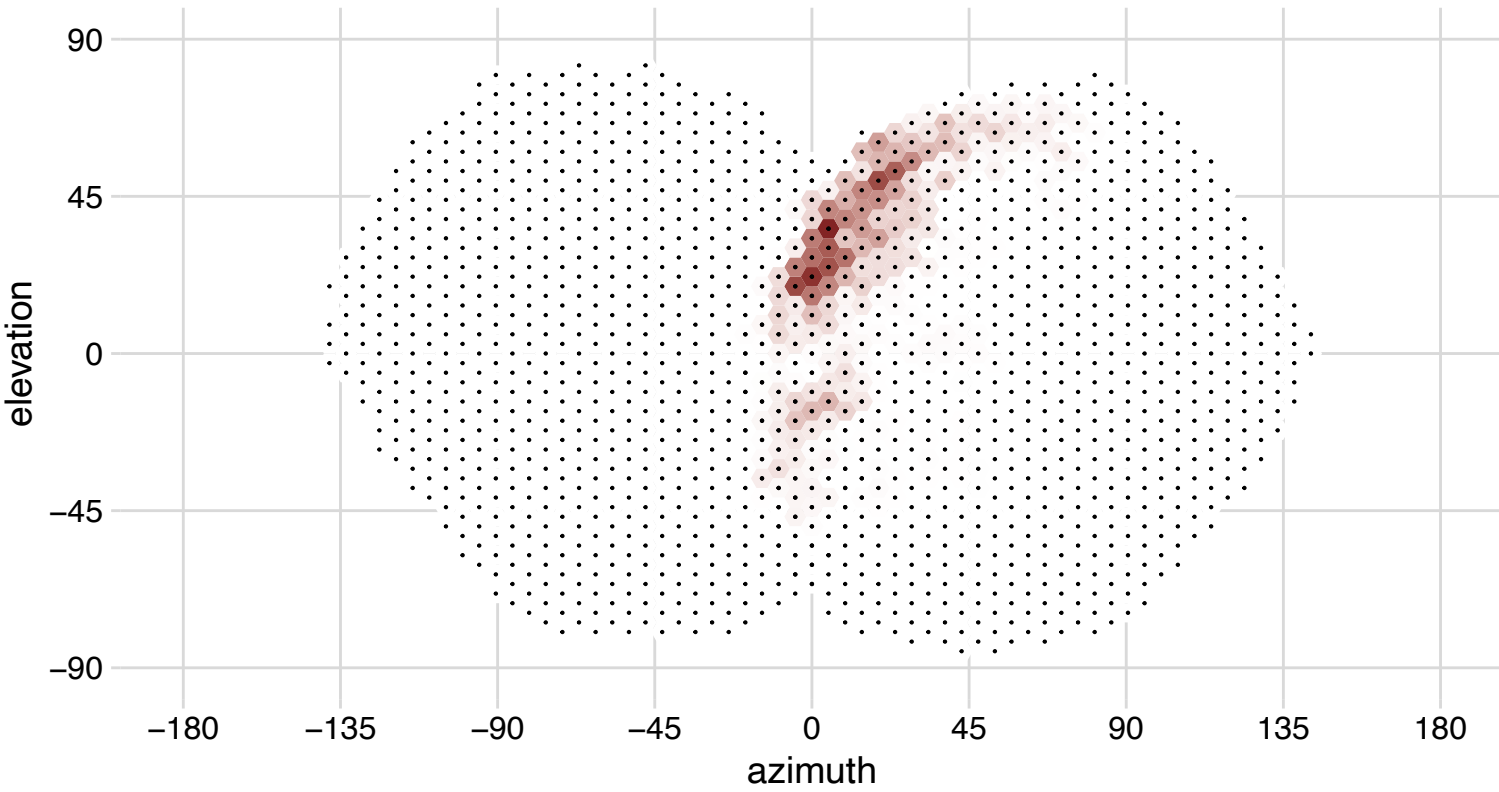

**ER3d\_d 720575940606591836**

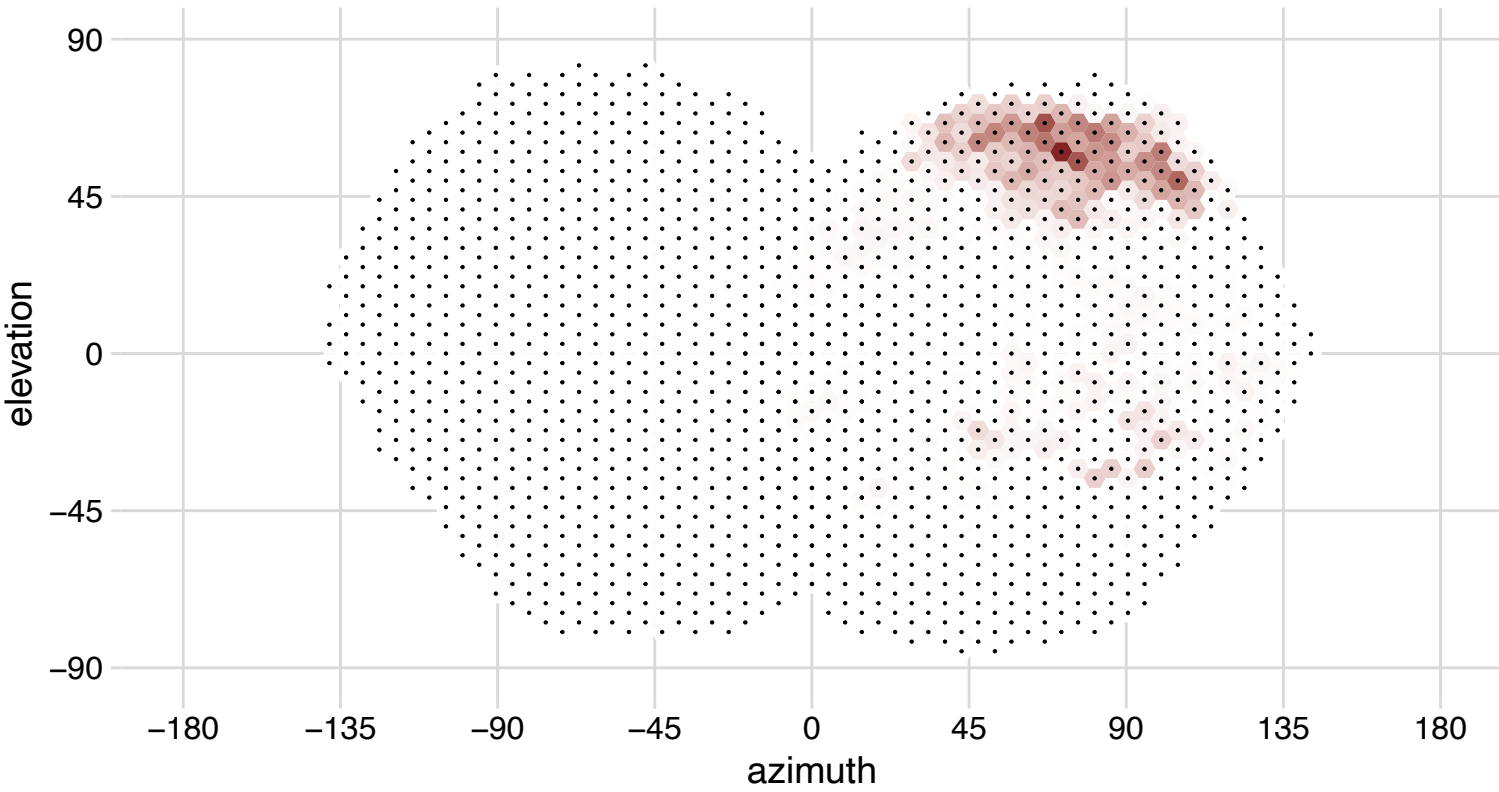

# ER3d\_d 720575940614073315

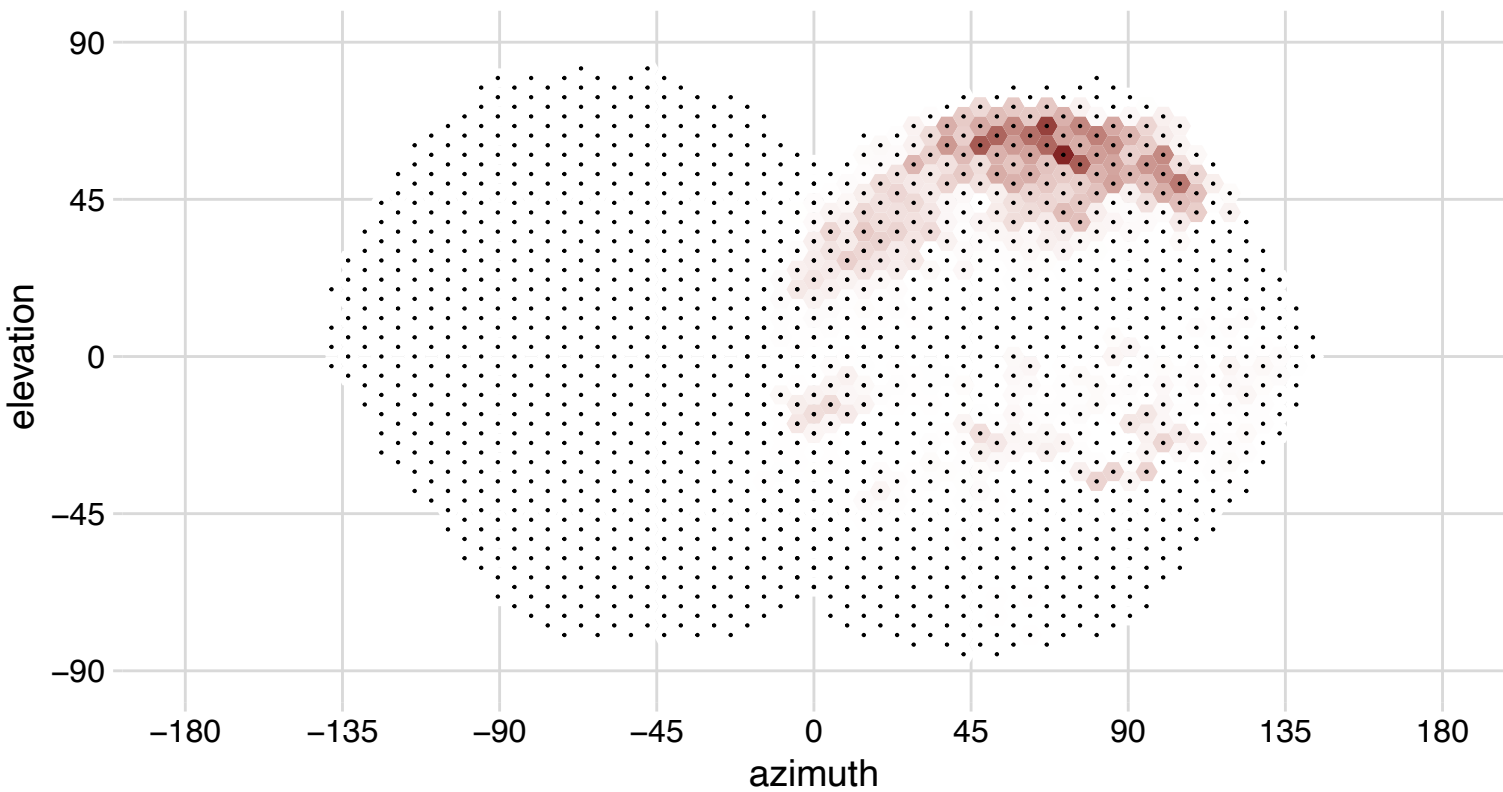

**ER3d\_d 720575940619829765**

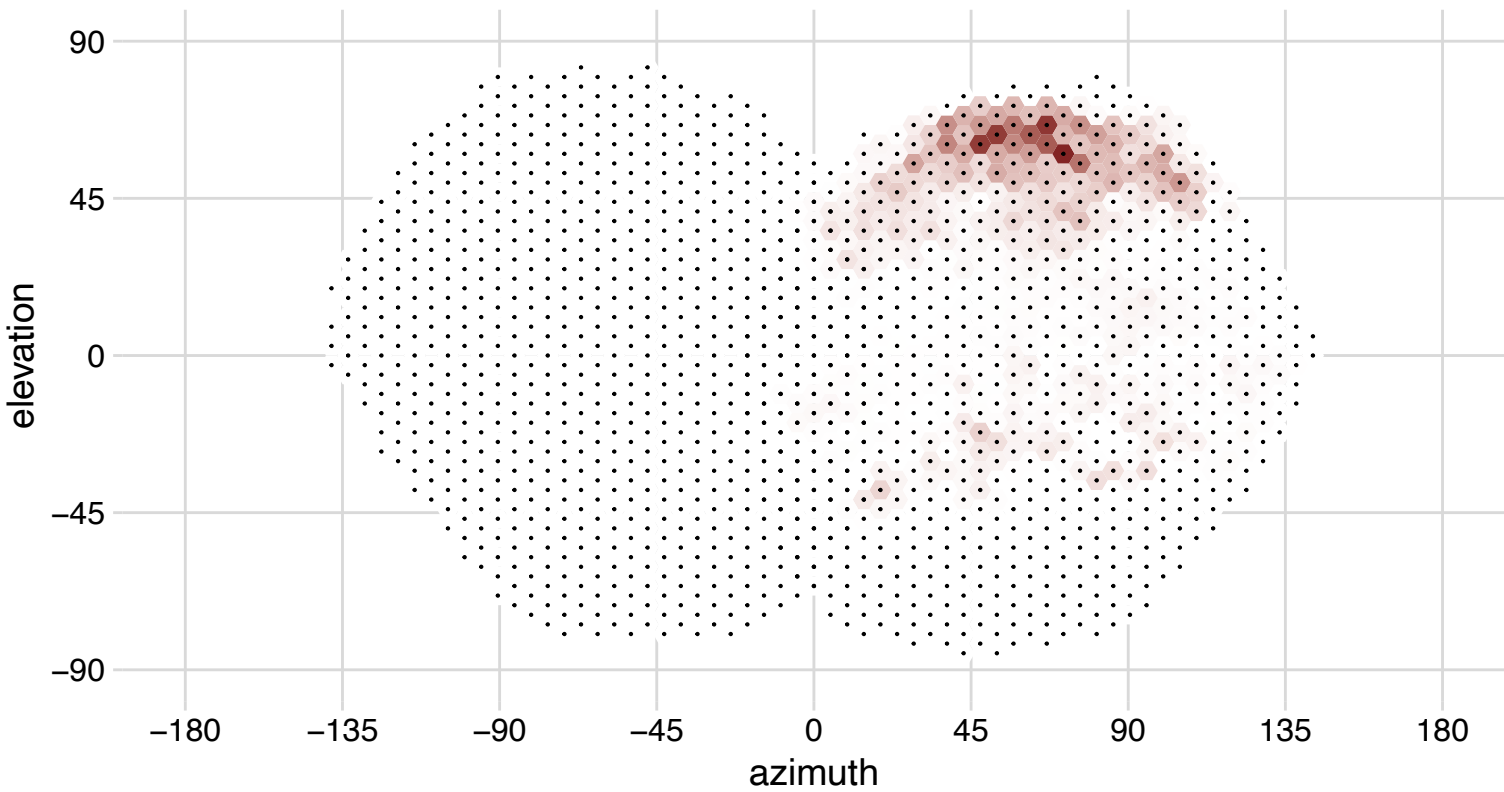

**ER3m 720575940609621003**

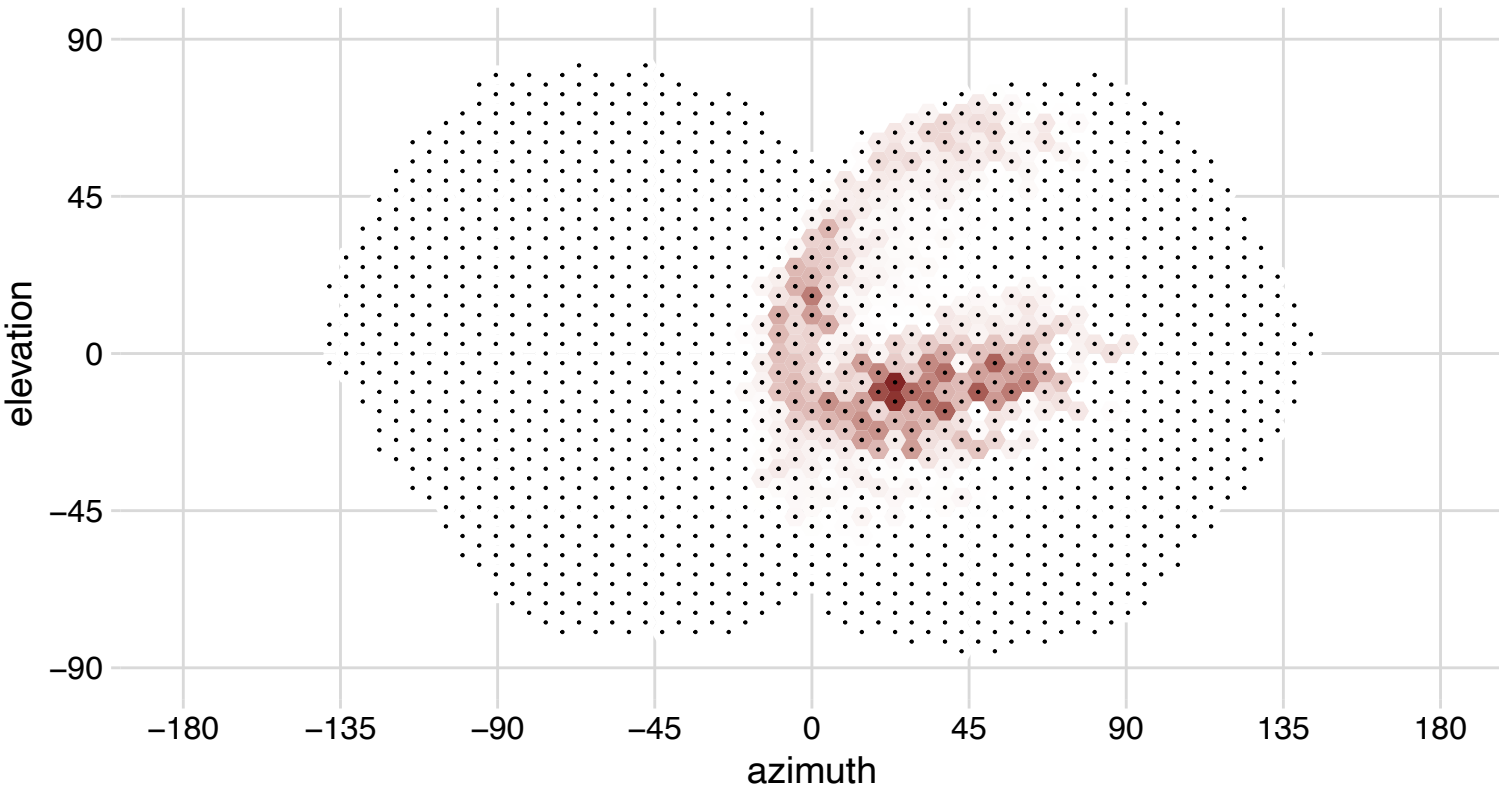



**ER3m 720575940610263665**

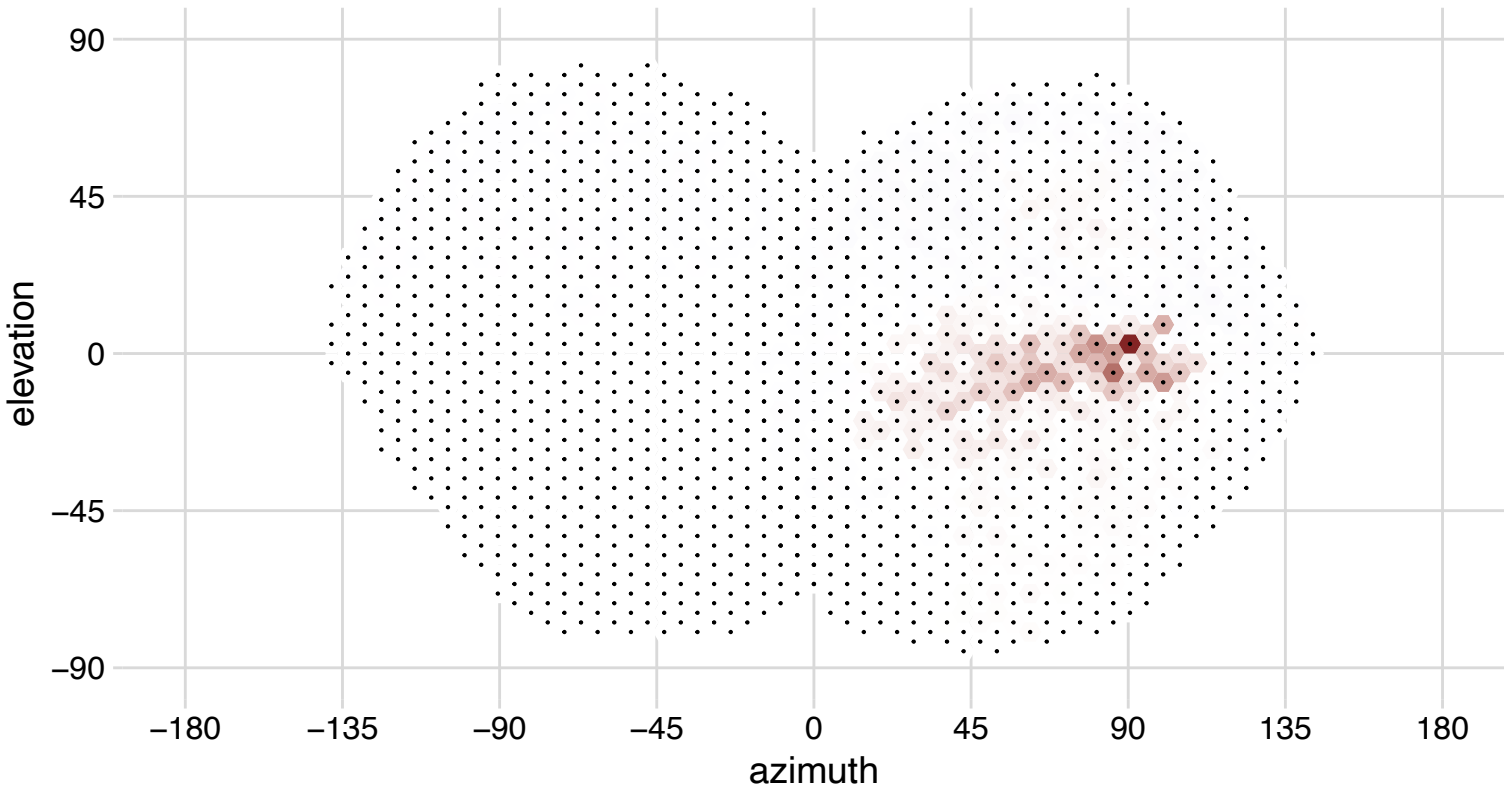

**ER3m 720575940613676402**

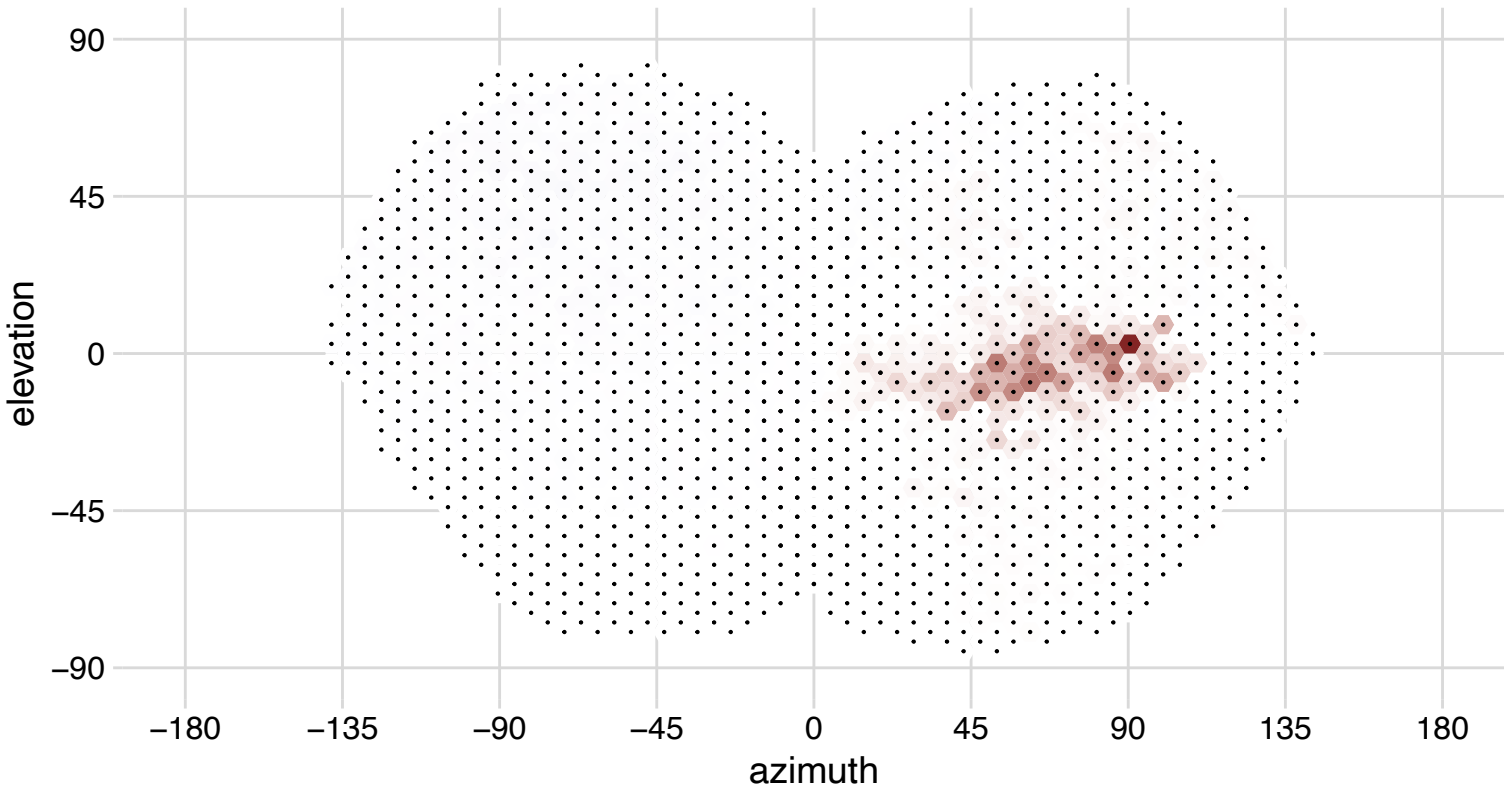

**ER3m 720575940614928691**

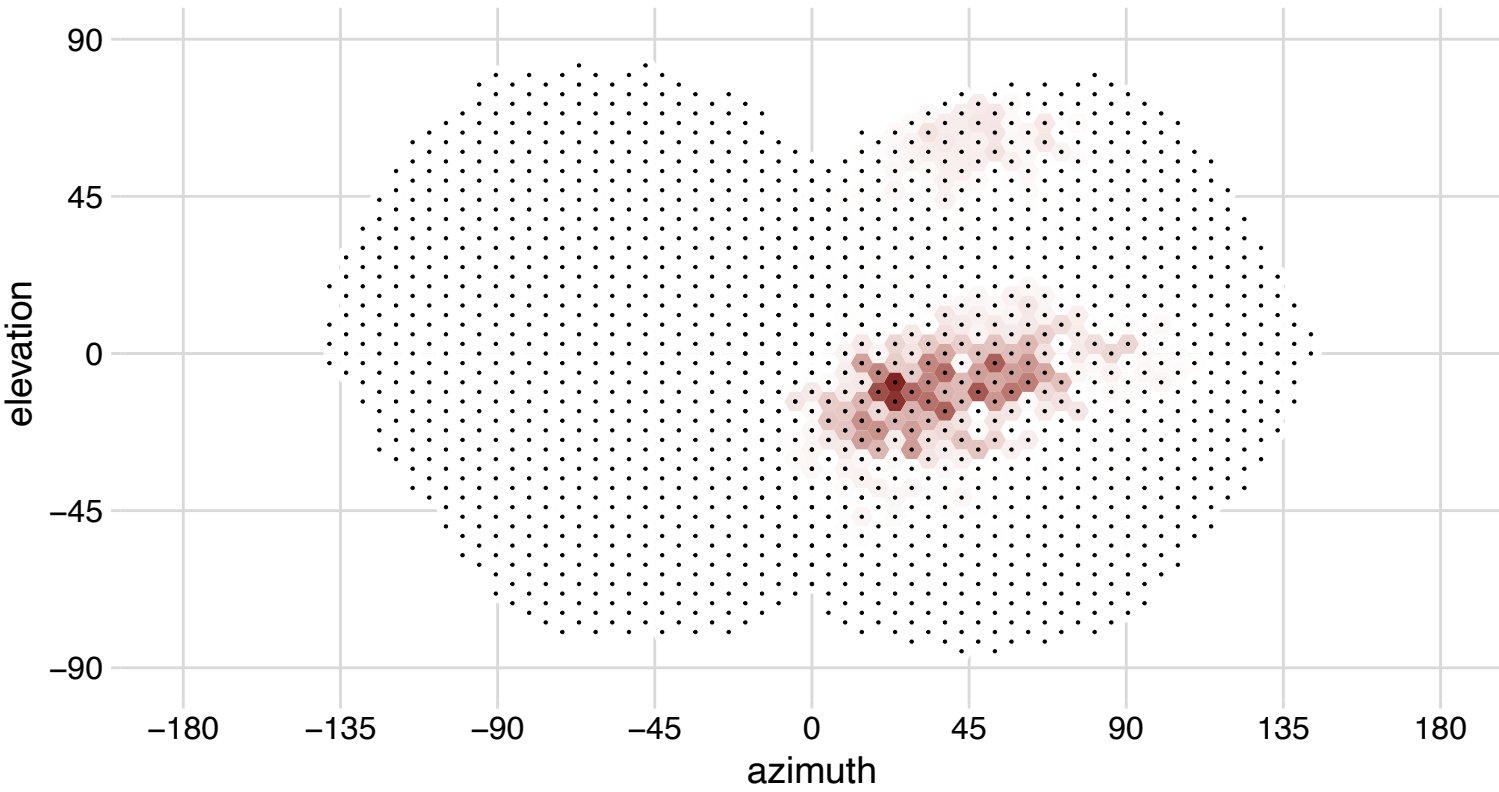

**ER3m 720575940616441410**

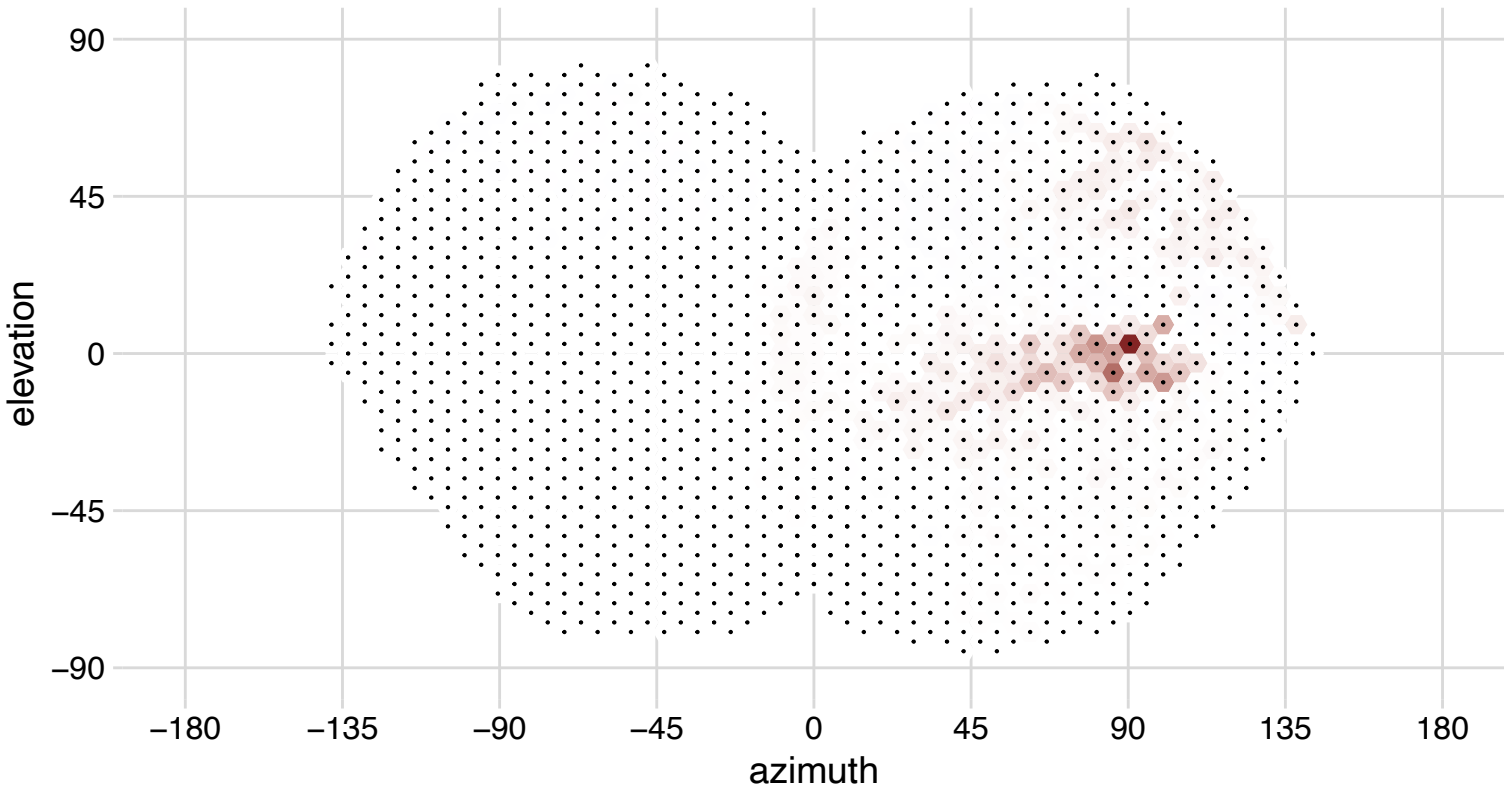

**ER3m 720575940618045986**

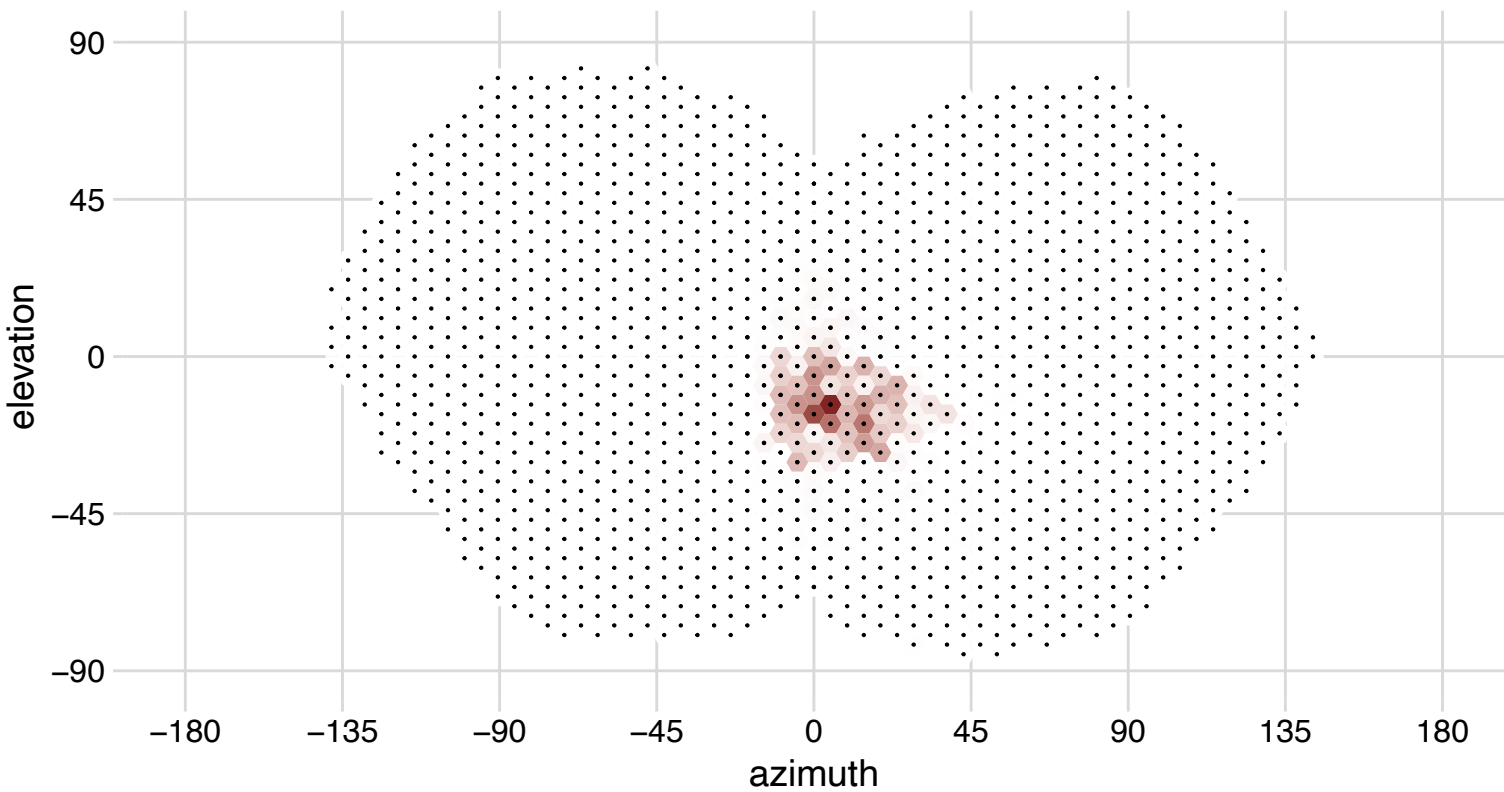

**ER3m 720575940630658807**

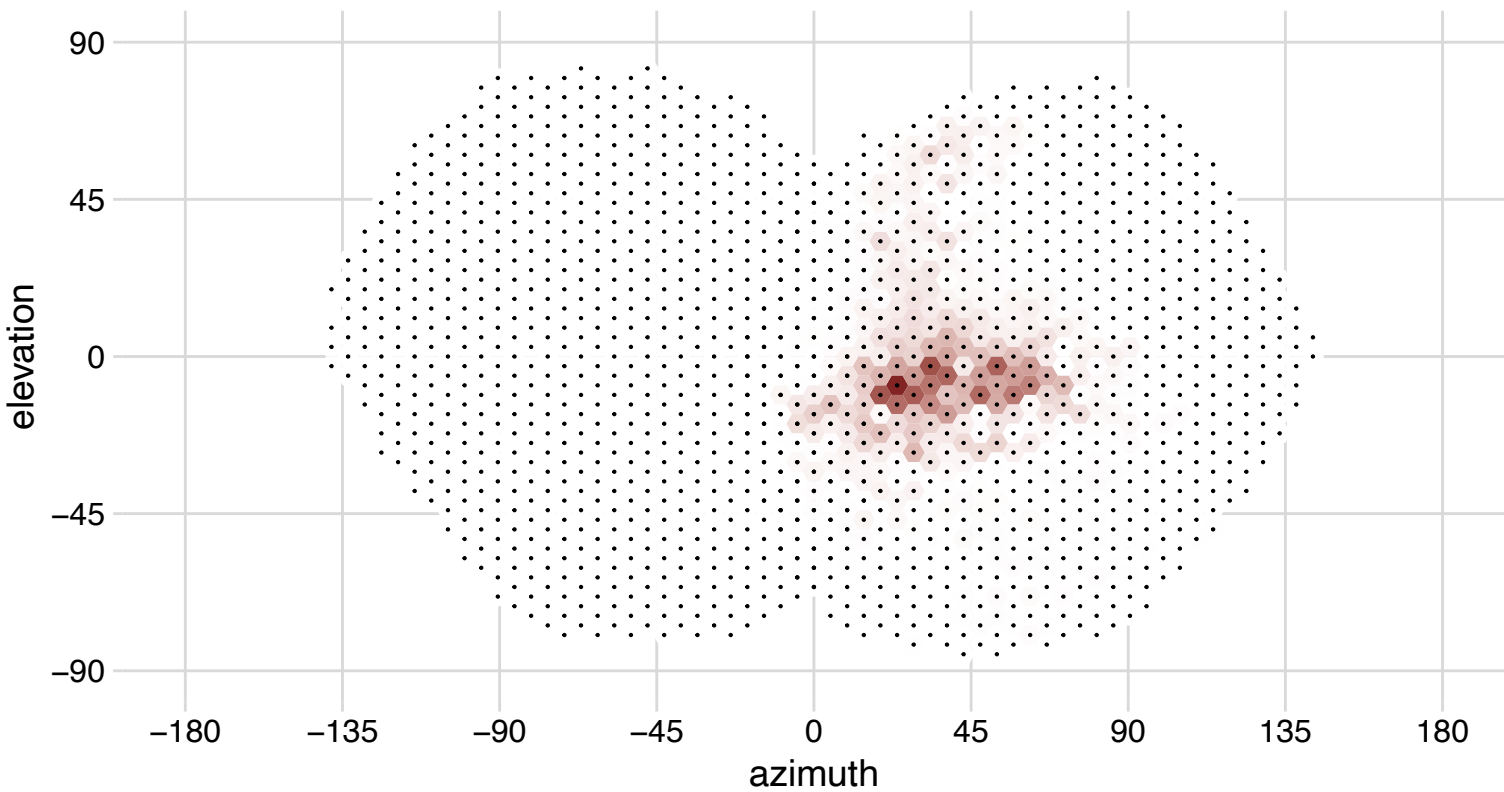

**ER3p\_ab 720575940613700674**

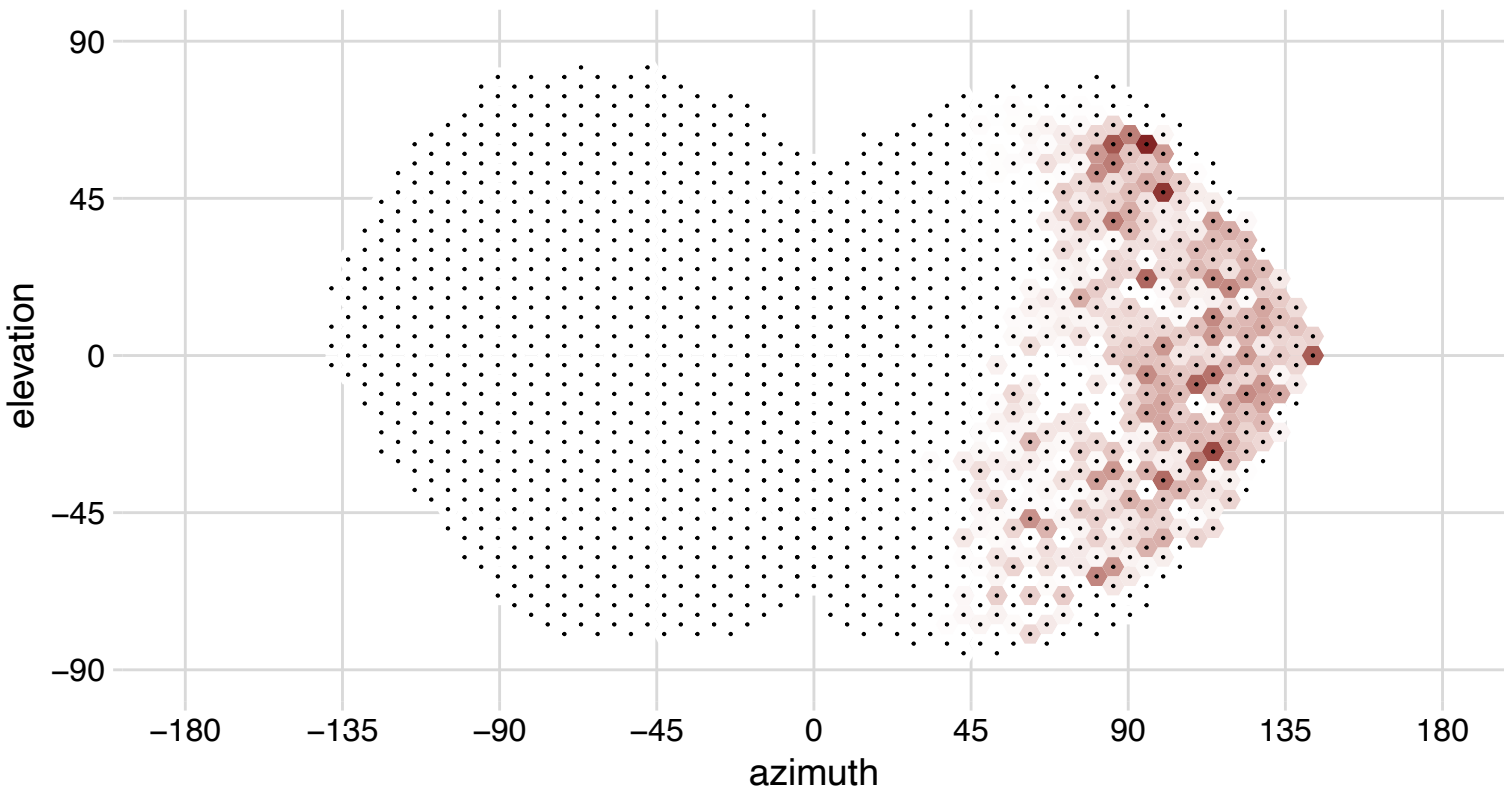

**ER3p\_ab 720575940618732782**

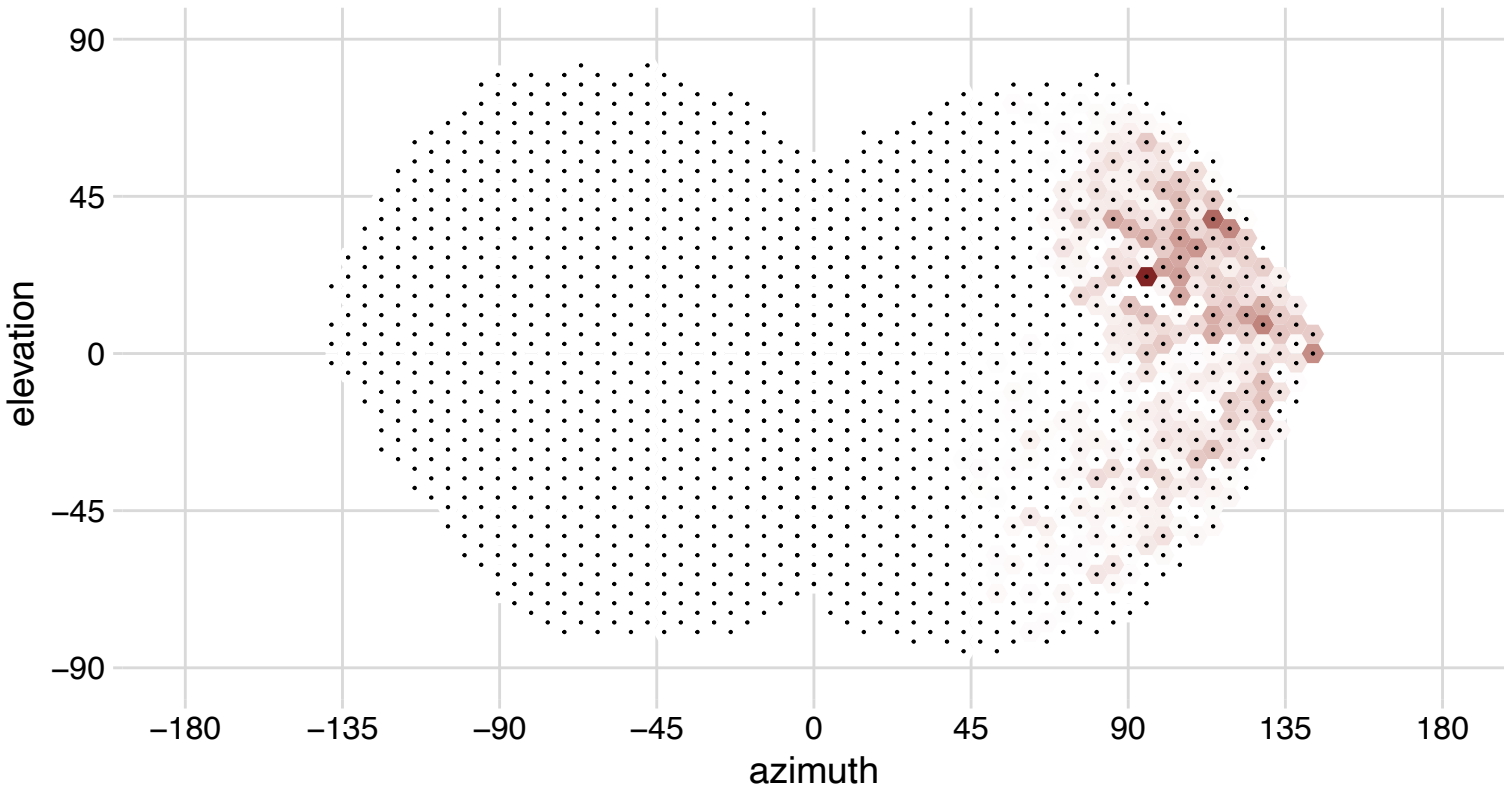



**ER3p\_ab 720575940619477232**

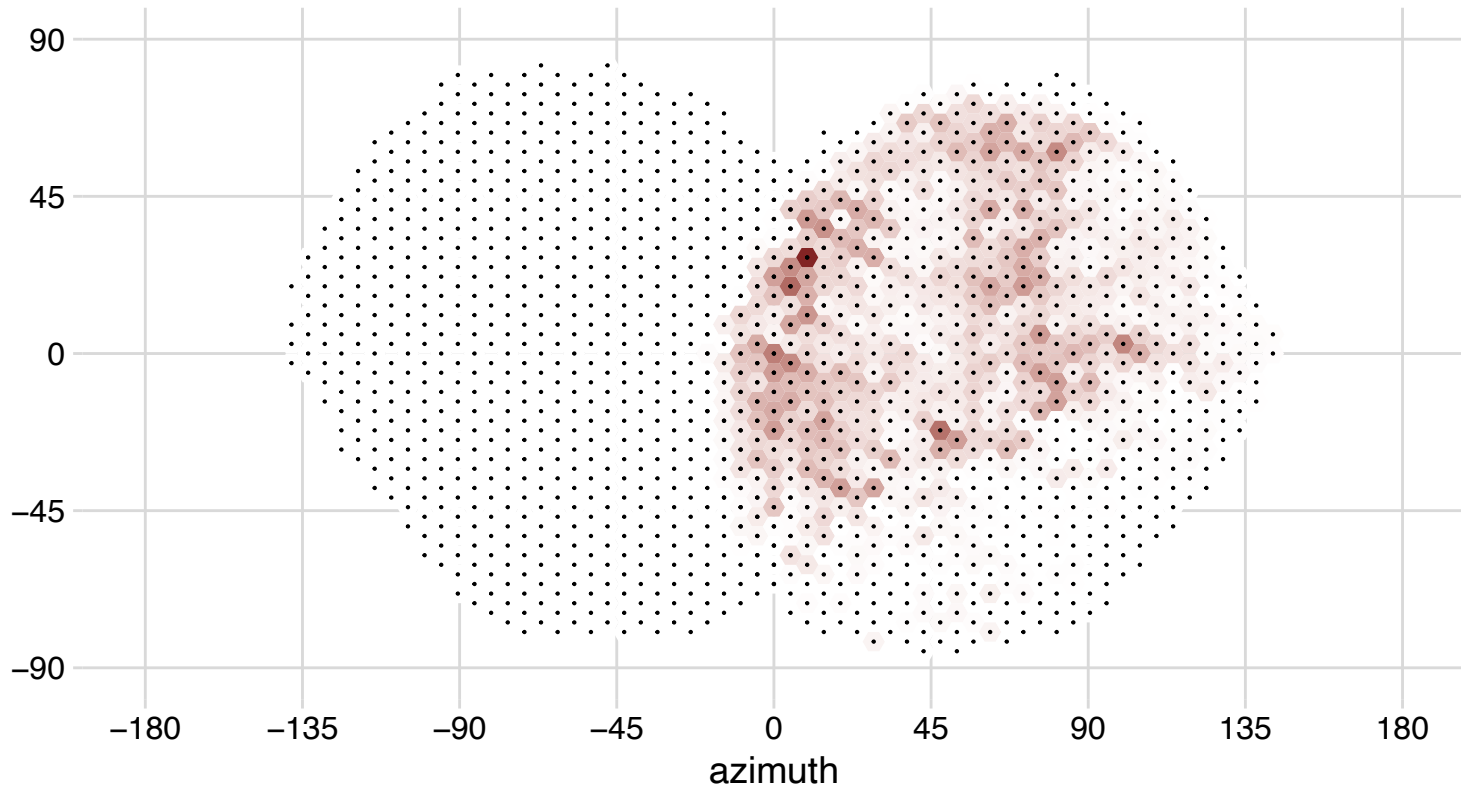

**ER3p\_ab 720575940619957786**

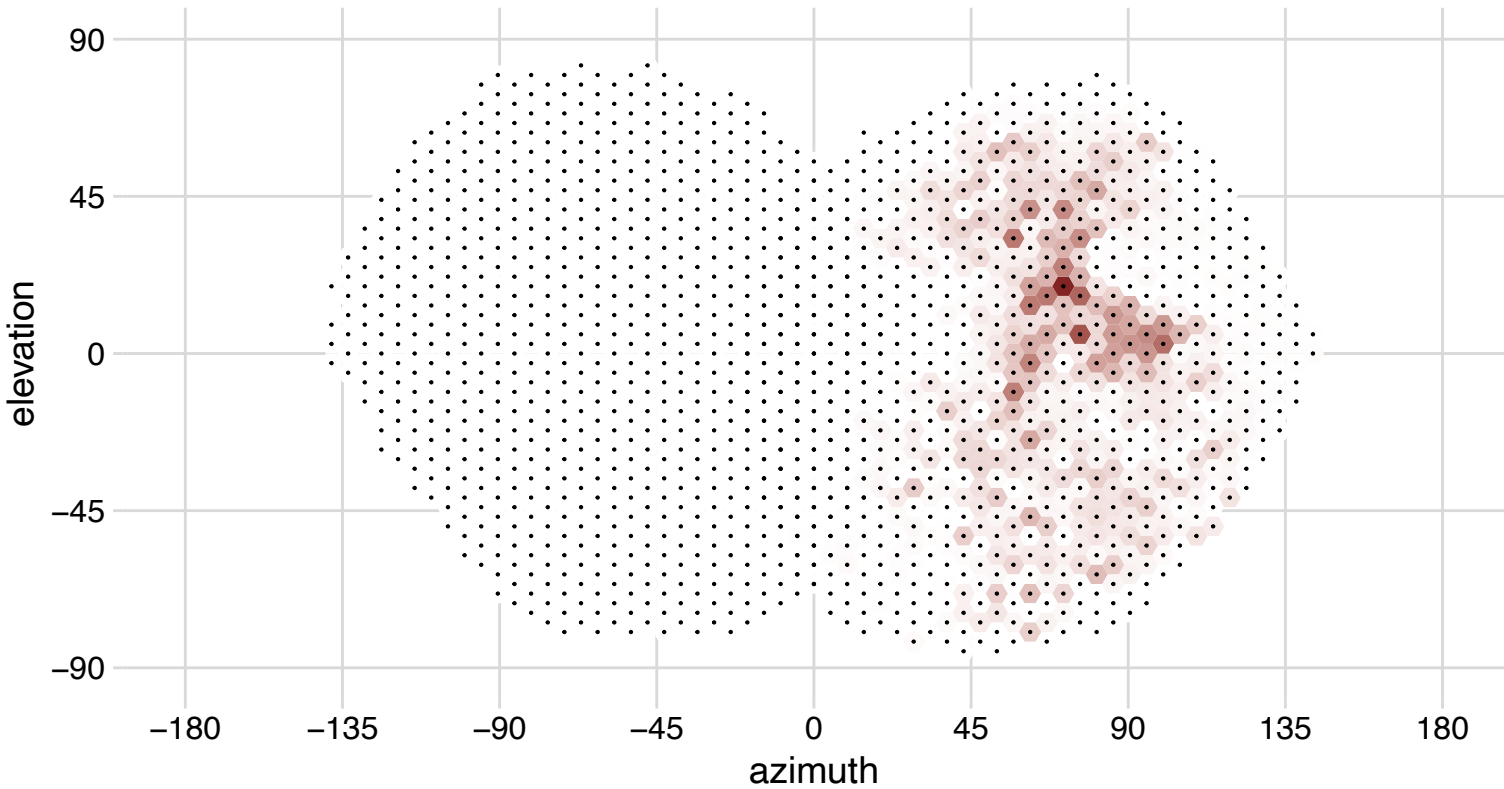

**ER3p\_ab 720575940622431305**

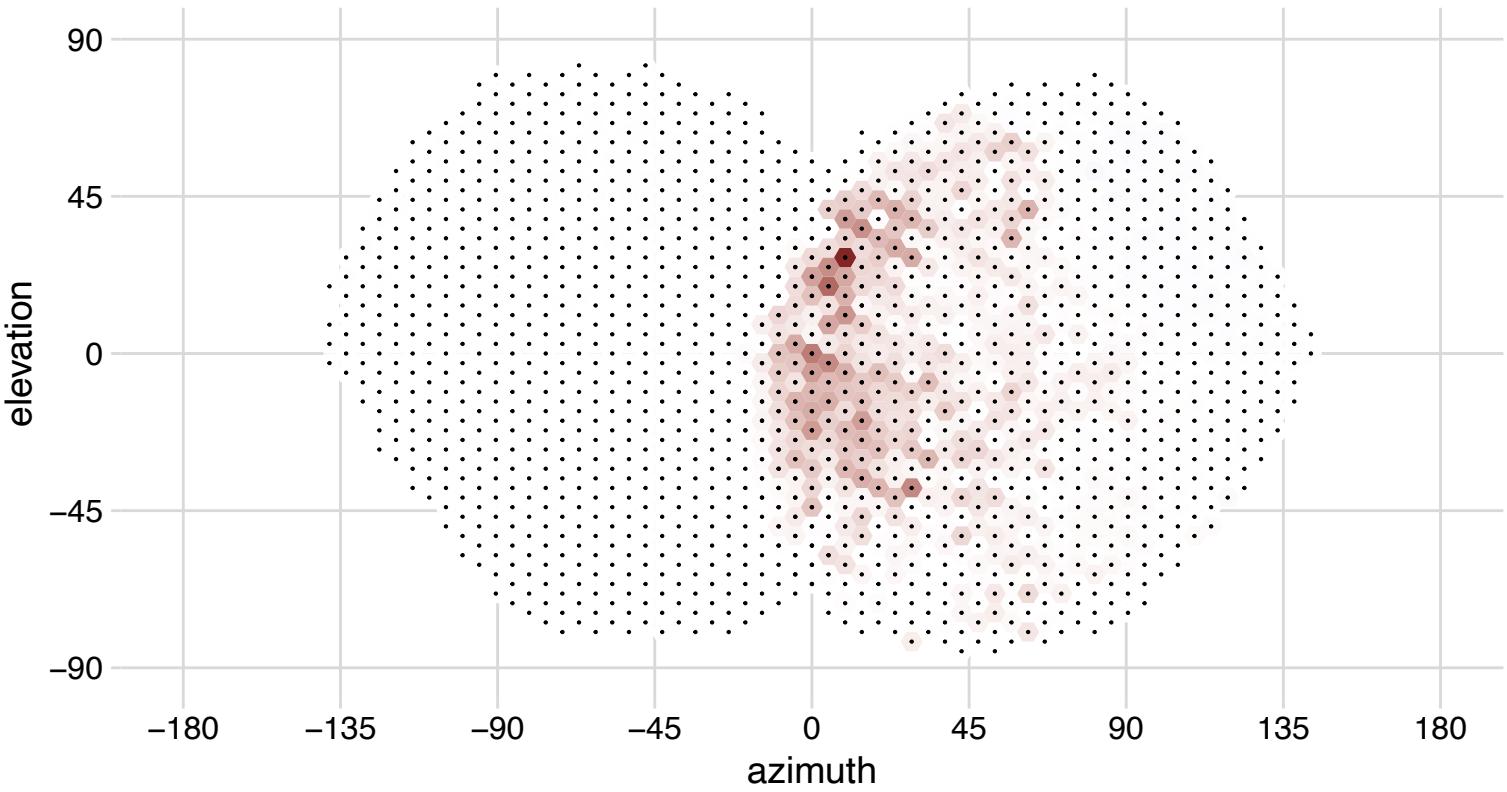

**ER3p\_ab 720575940640424589**

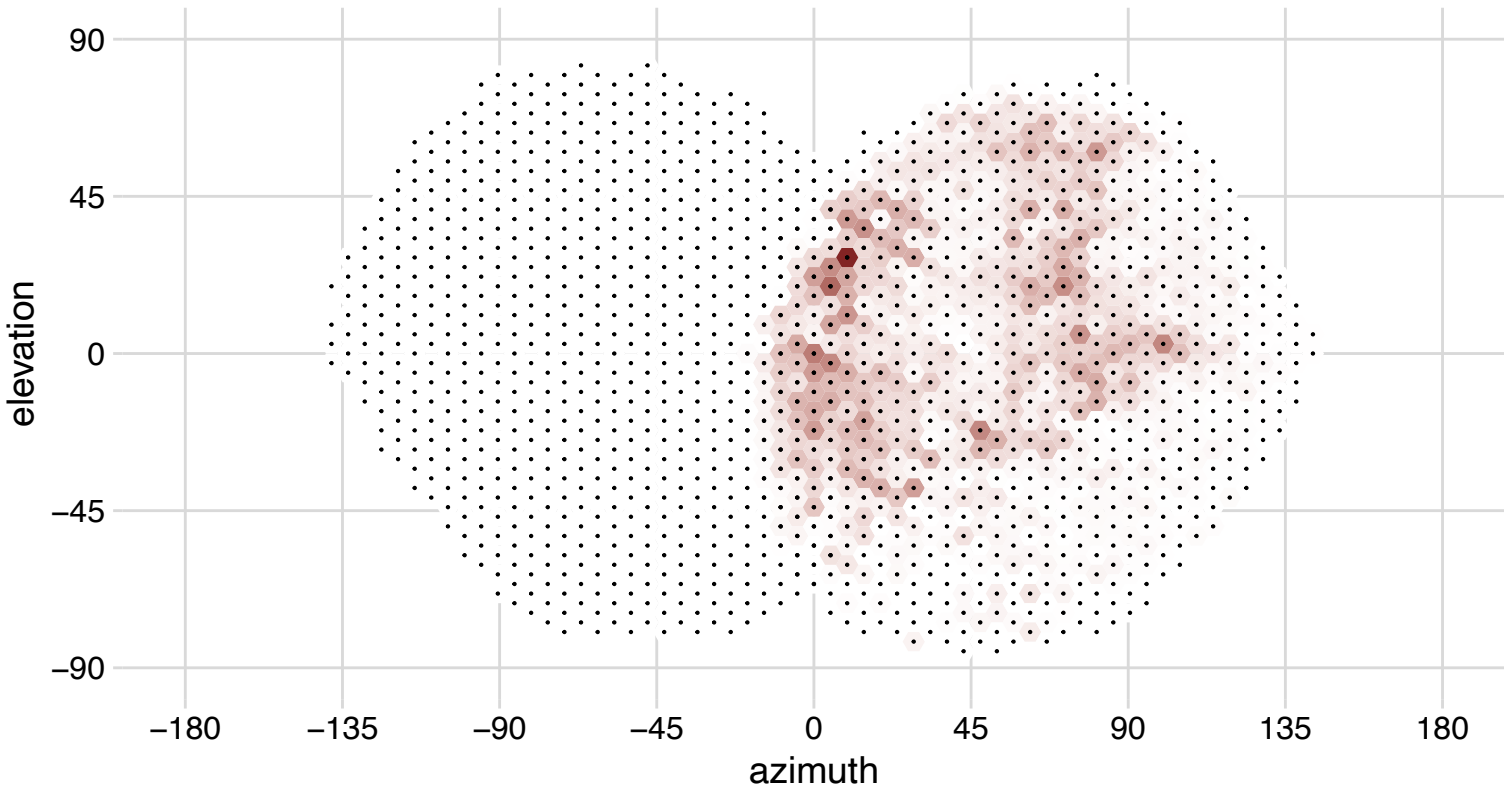

**ER3p\_ab 720575940640424845**

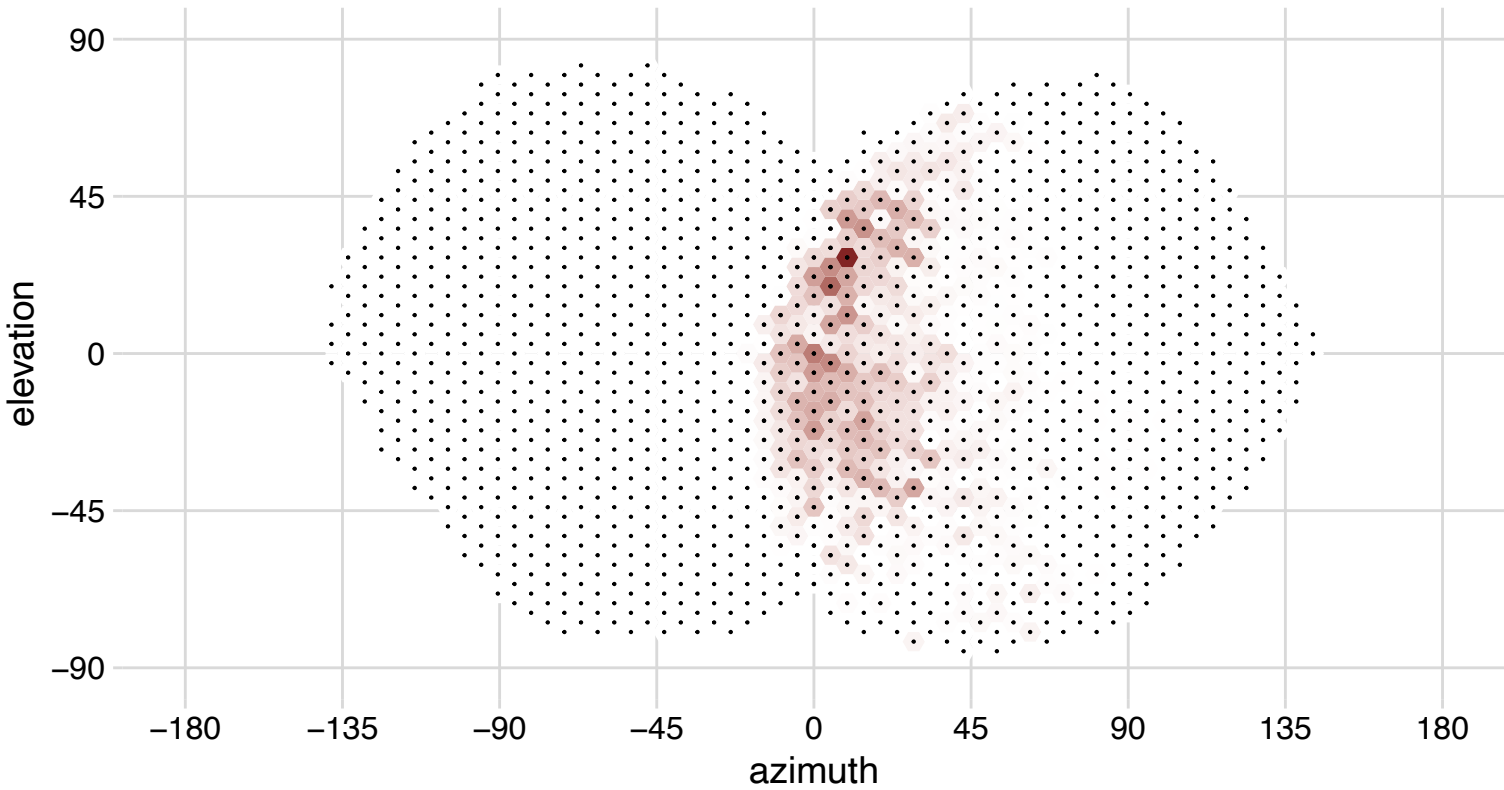

**ER3p\_ab 720575940647731833**

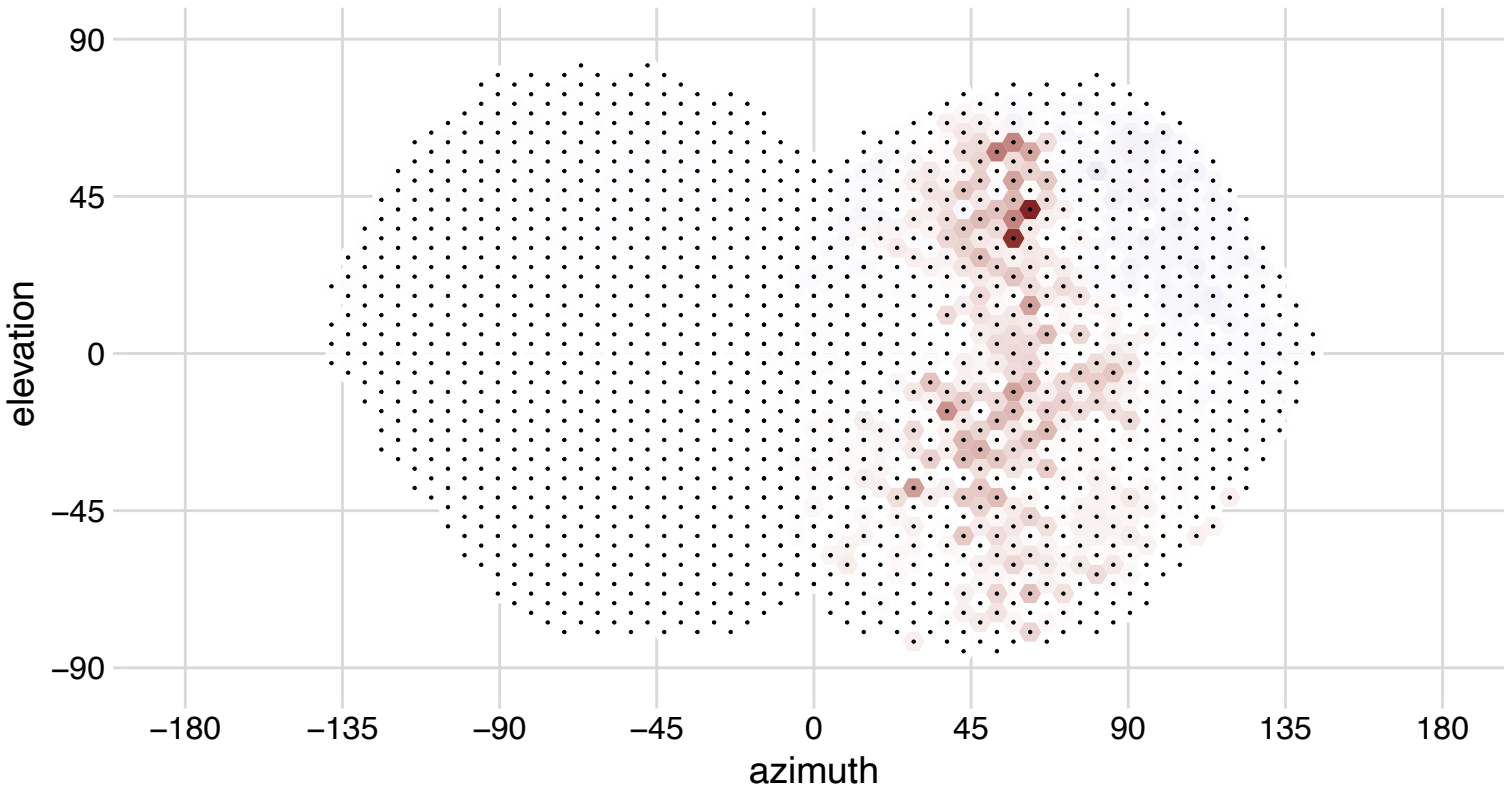

**ER3w\_ab 720575940610505701**

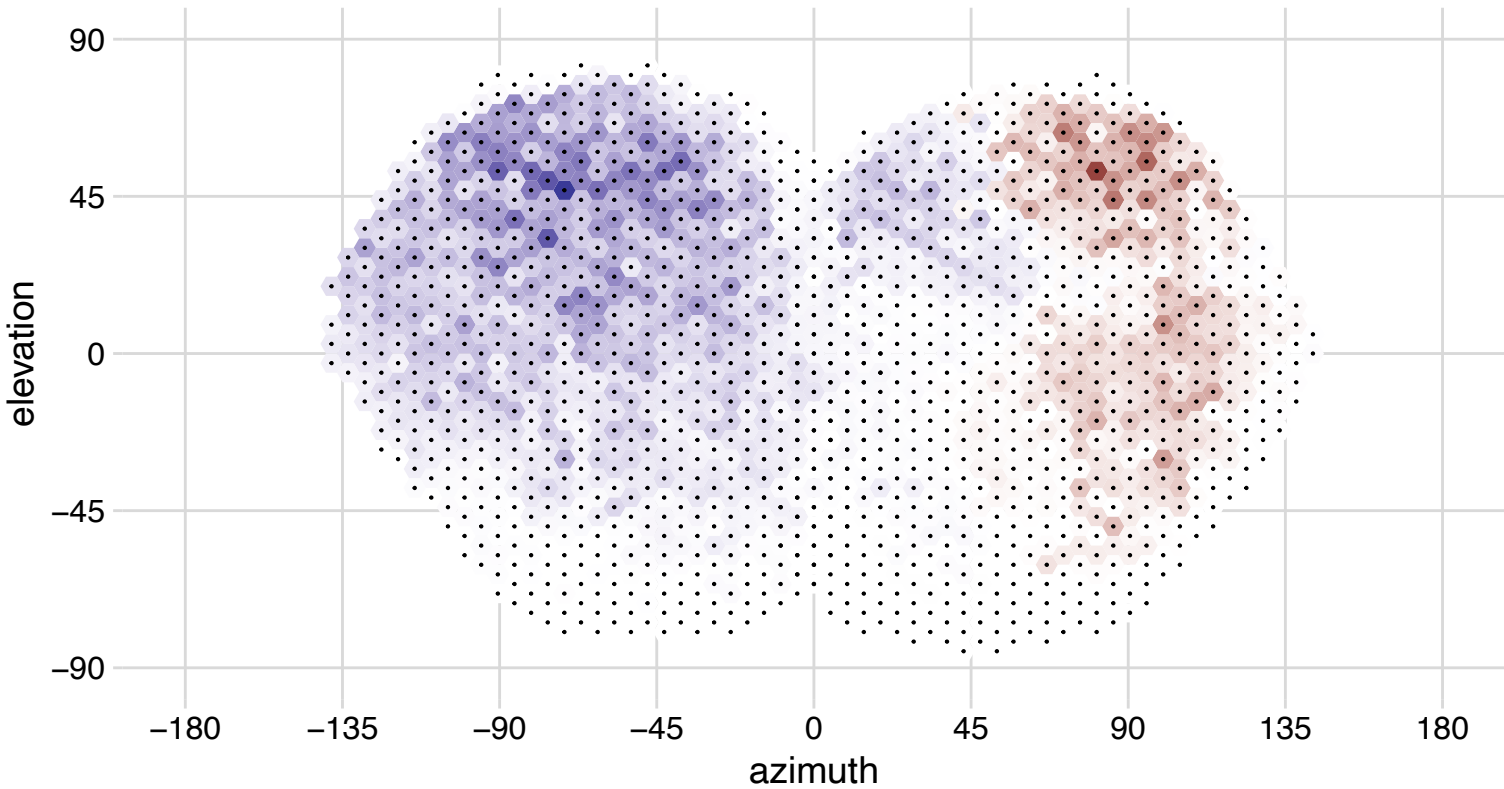

**ER3w\_ab 720575940612979090**

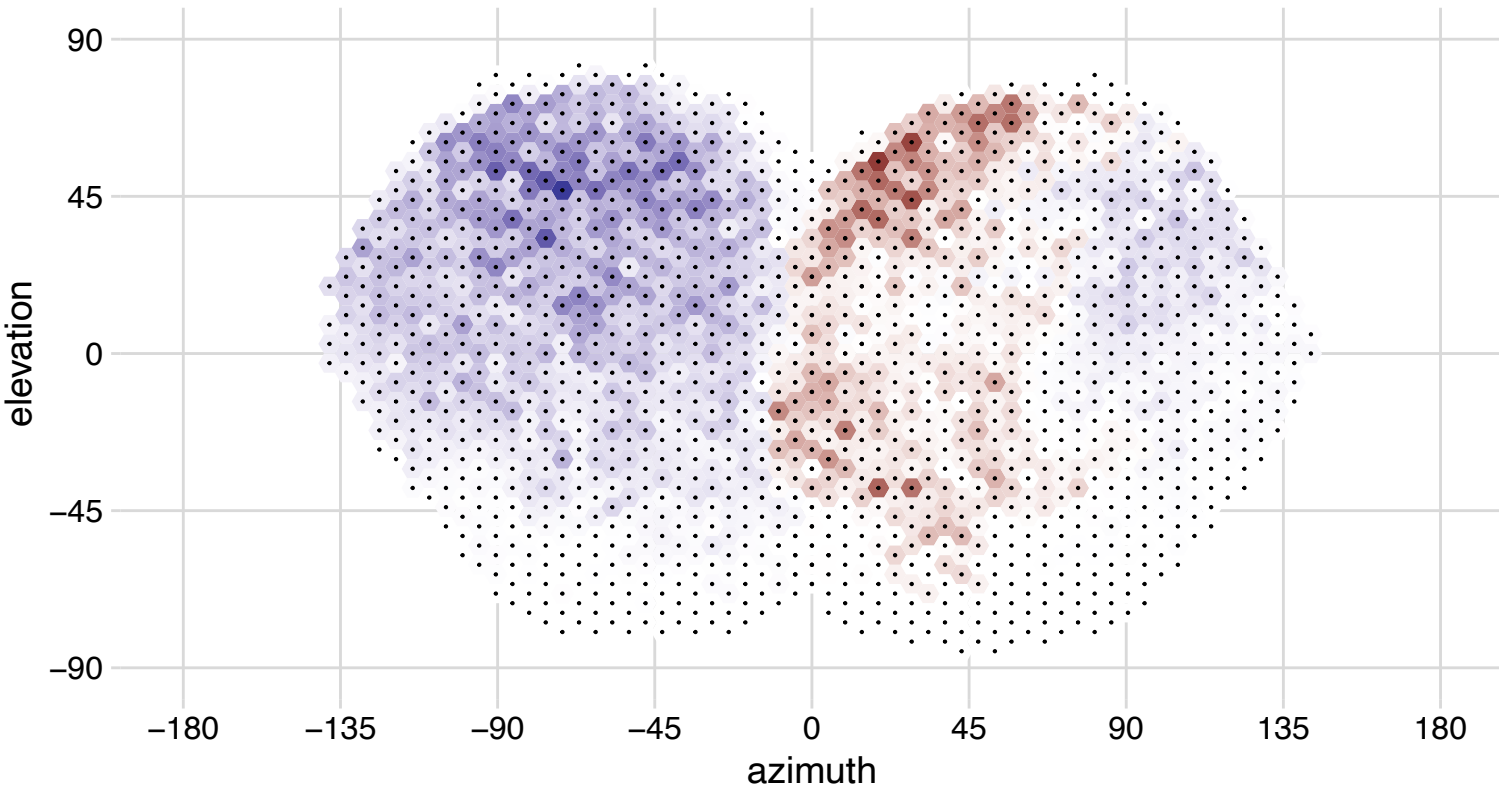



**ER3w\_ab 720575940613646751**

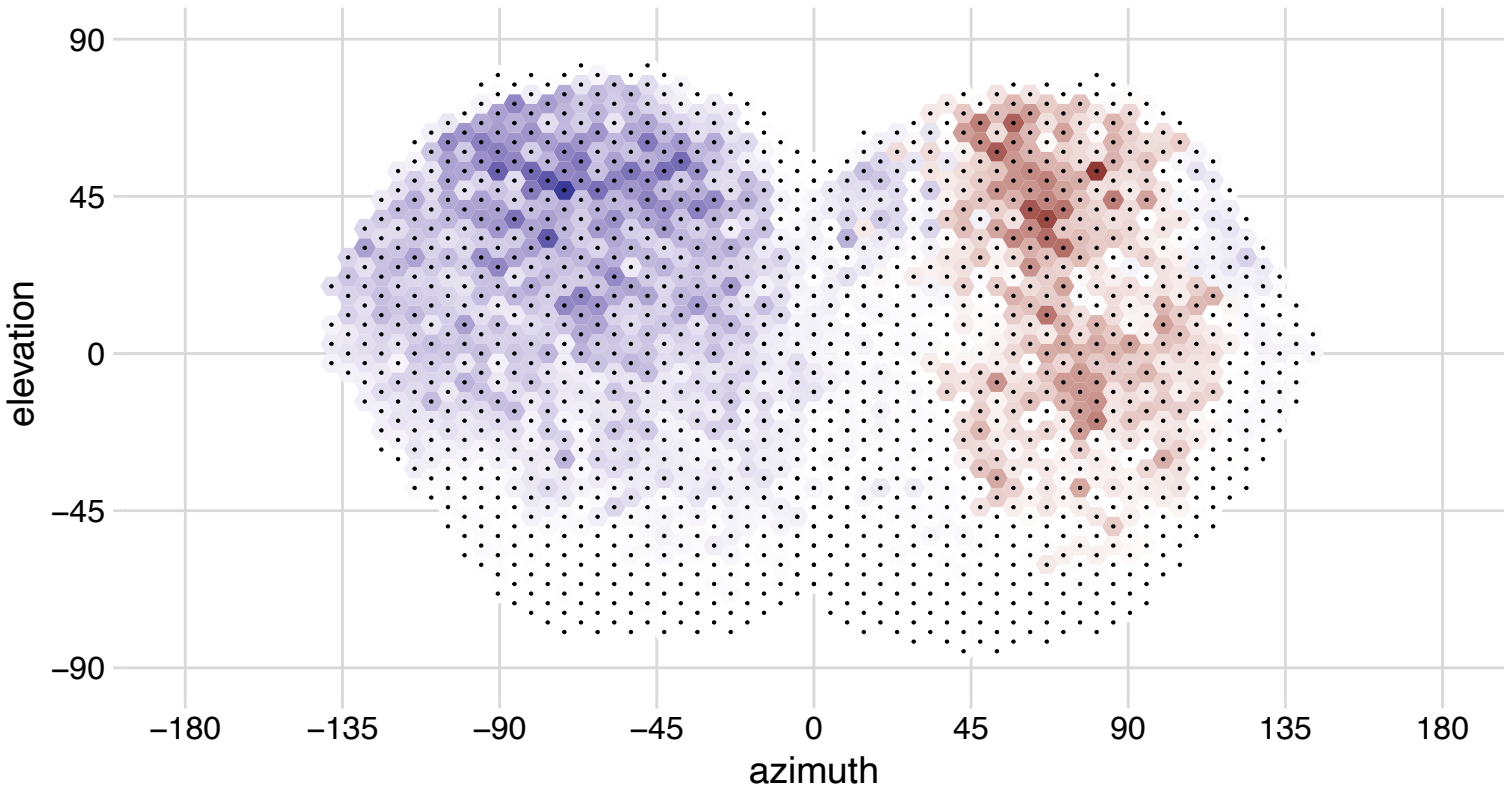

**ER3w\_ab 720575940616025378**

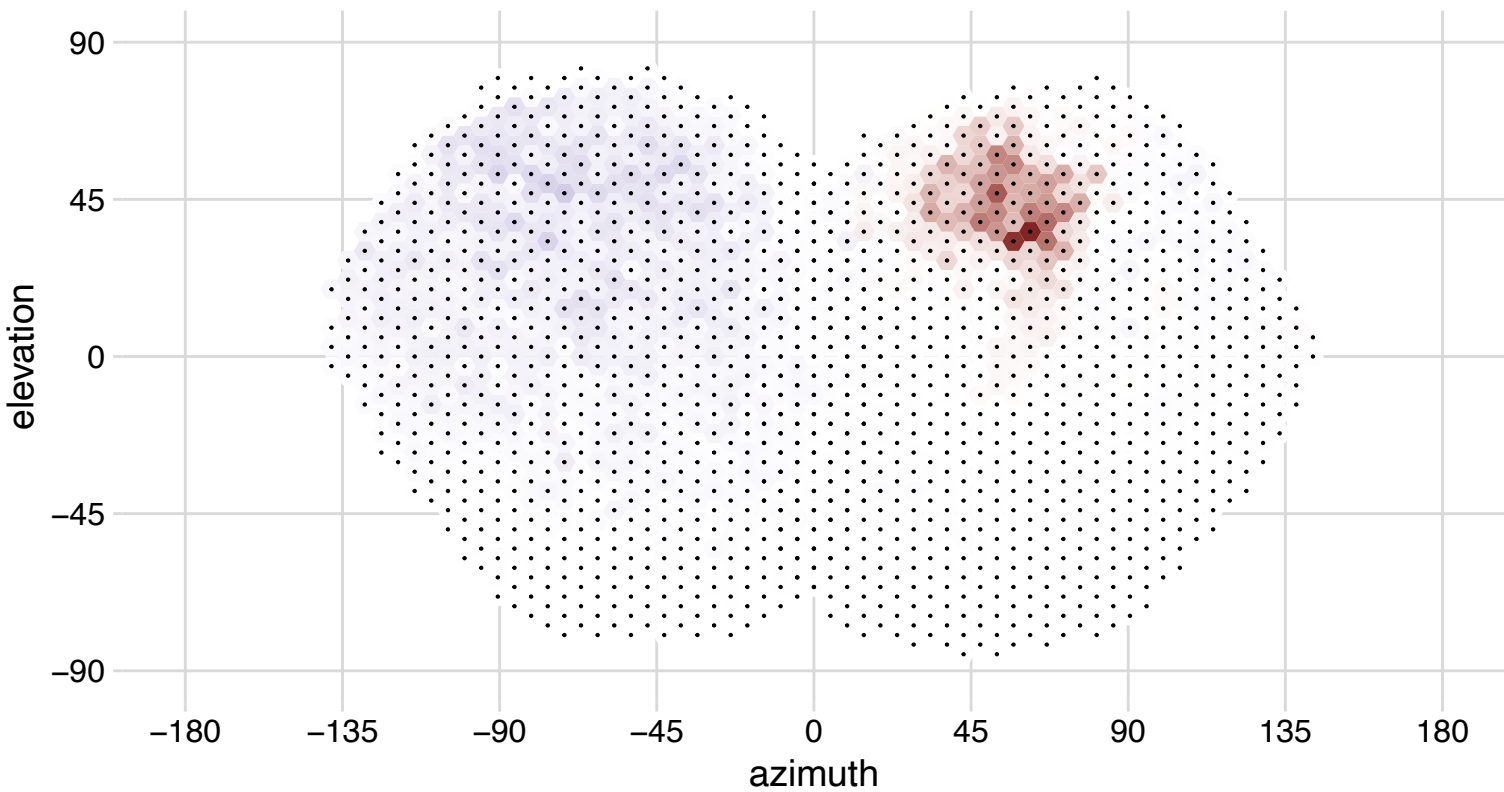

**ER3w\_ab 720575940618306469**

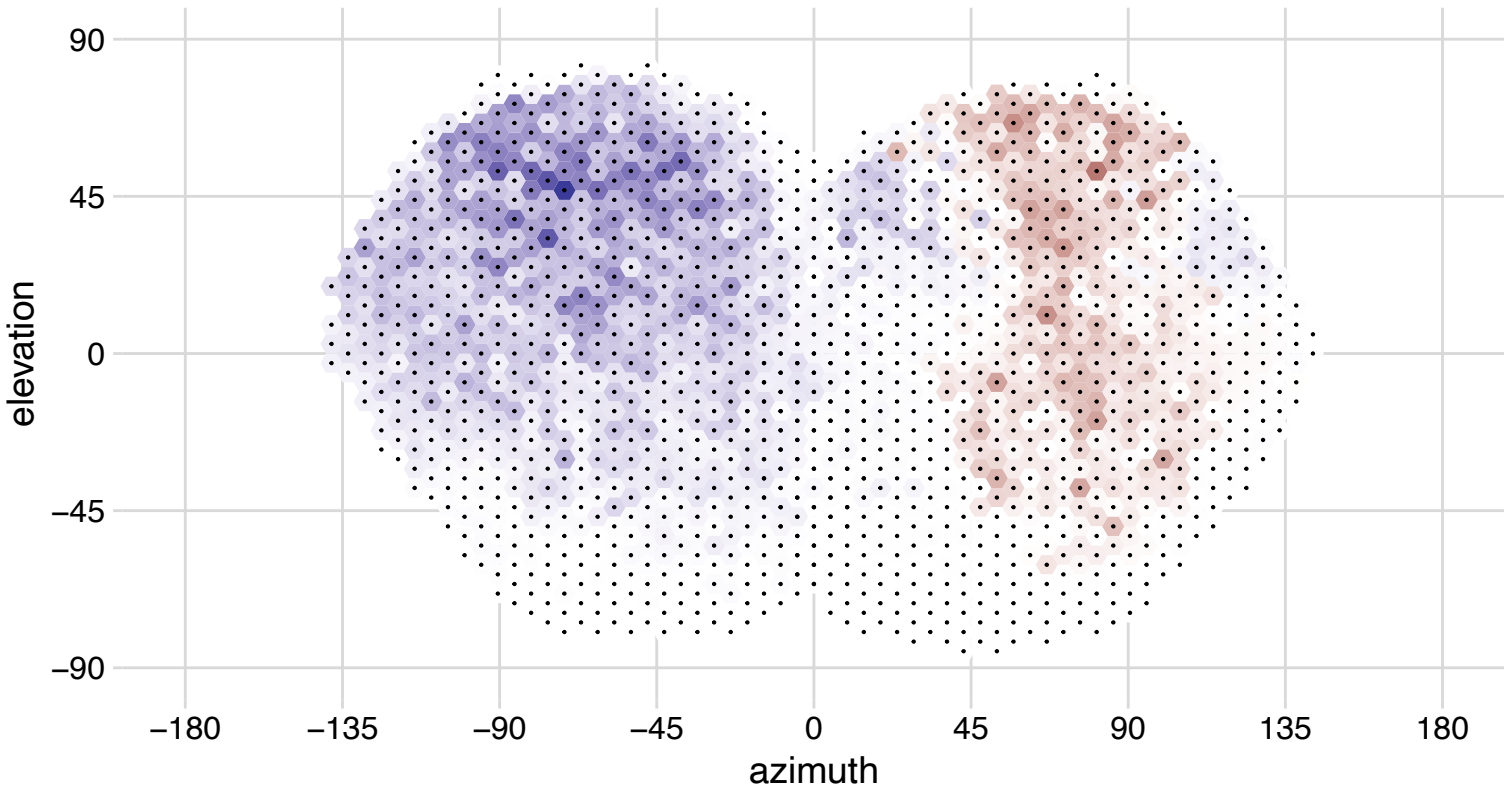

**ER3w\_ab 720575940621066776**

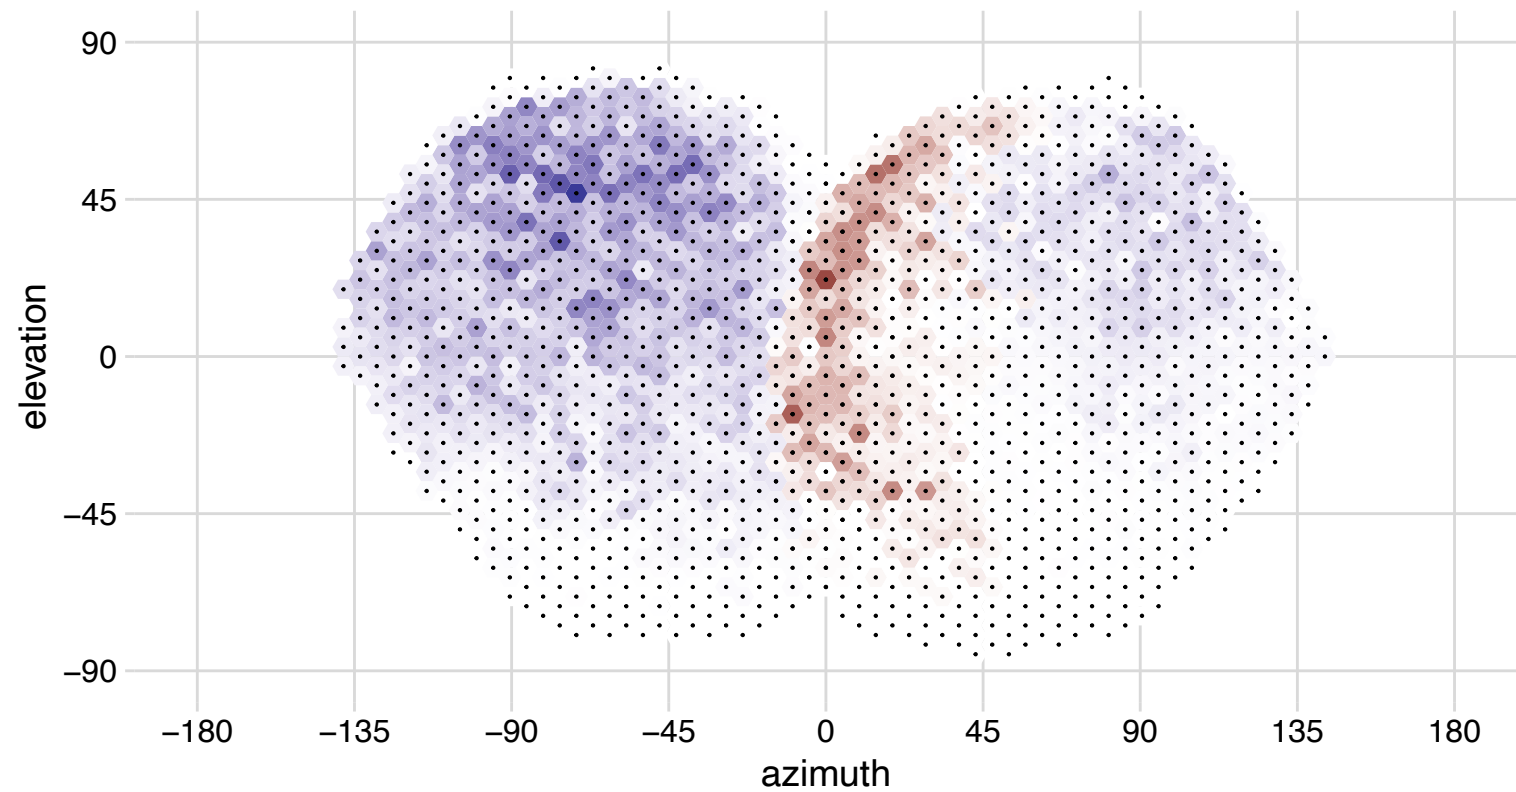

**ER3w\_ab 720575940623298823**

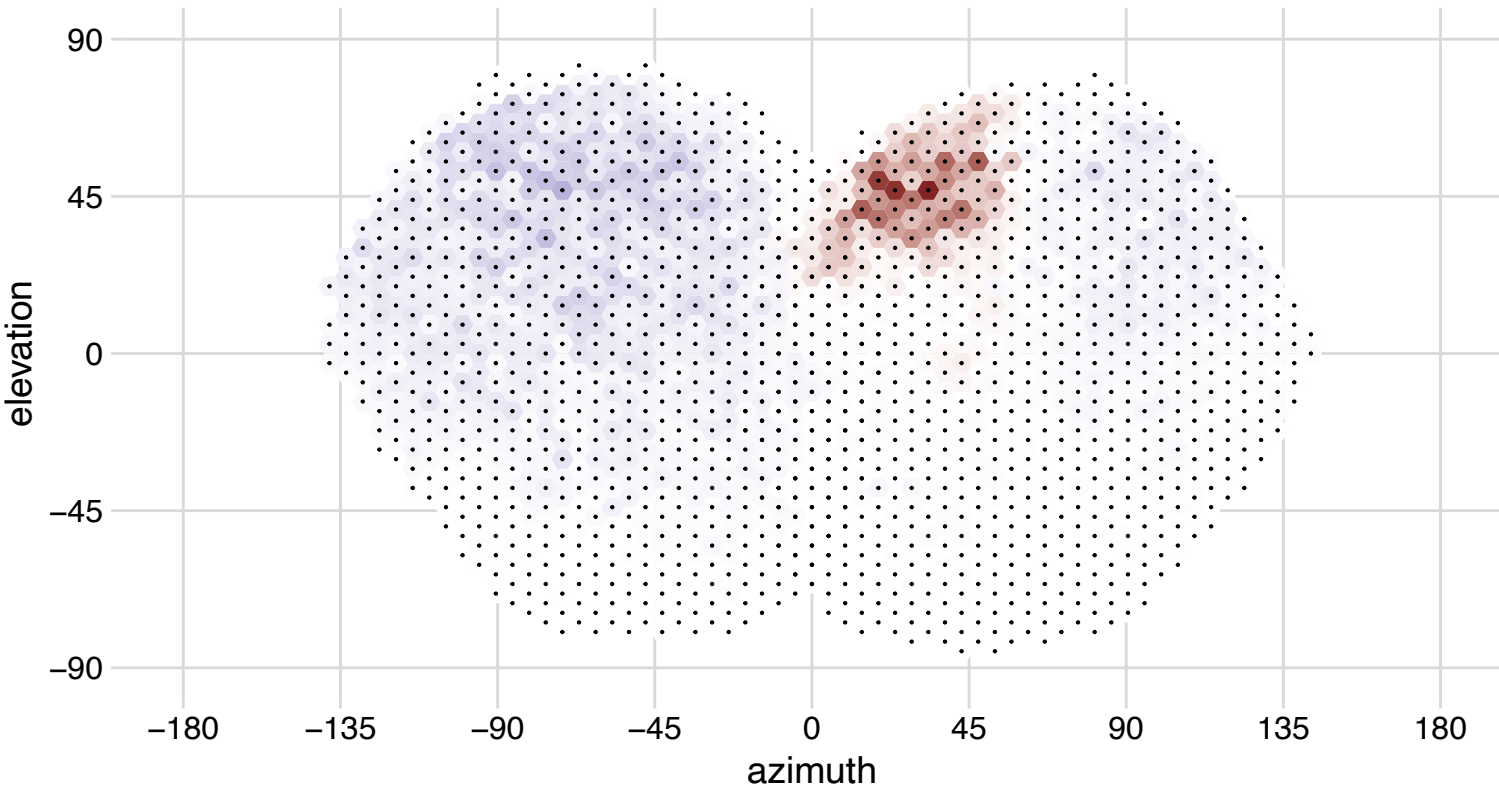

**ER3w\_ab 720575940624470812**

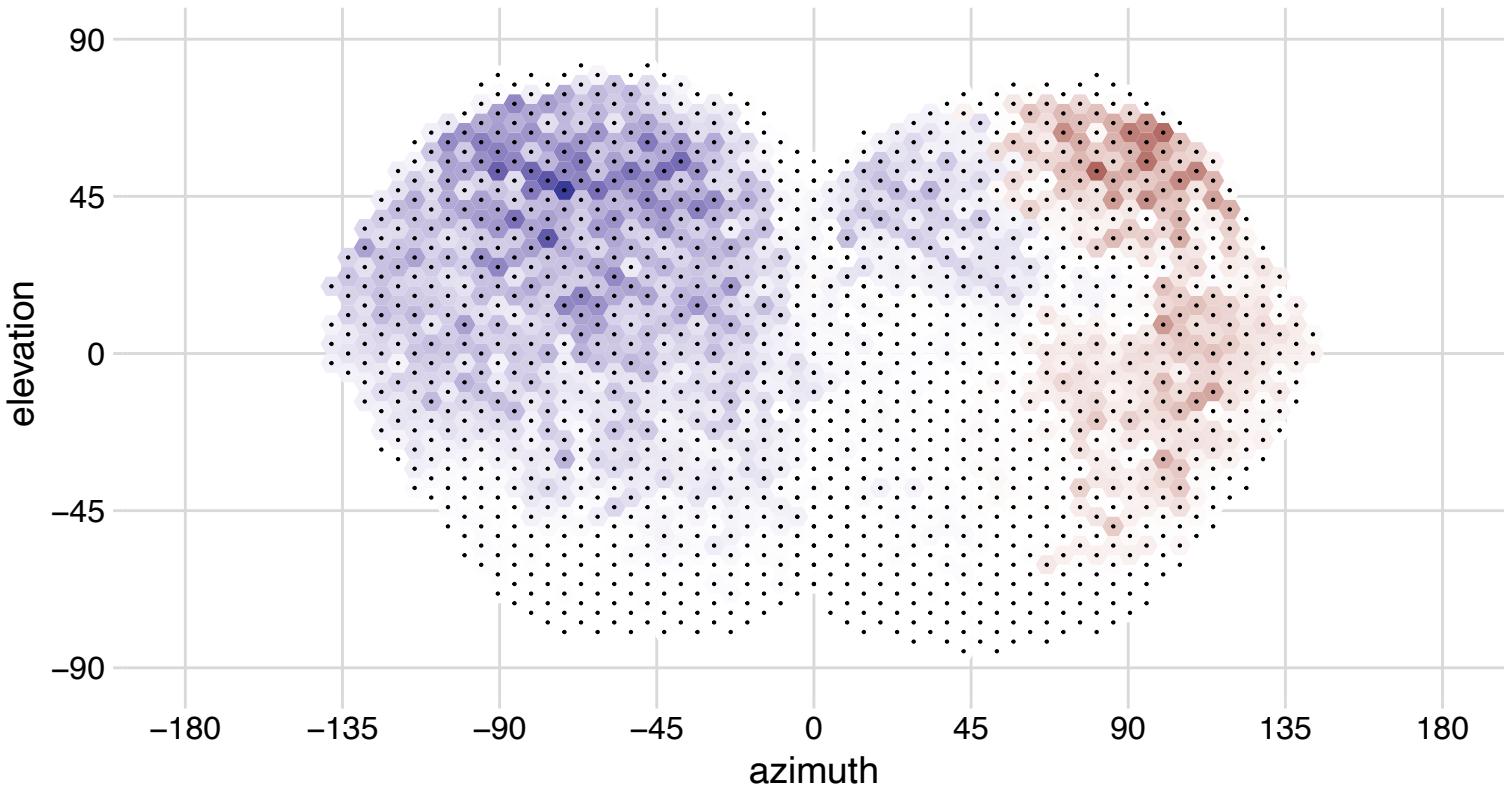

**ER3w\_ab 720575940626363654**

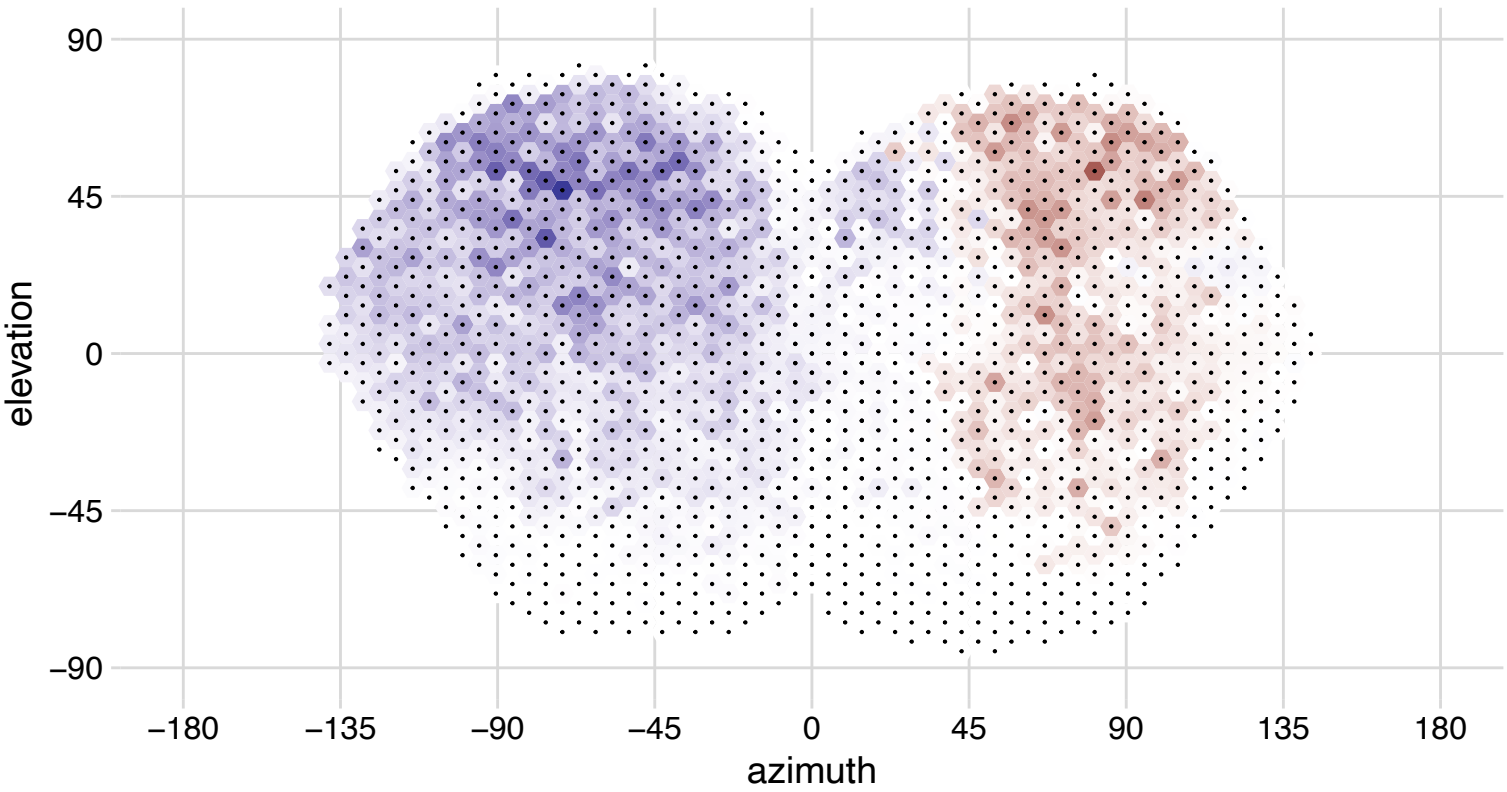

**ER3w\_ab 720575940626421578**

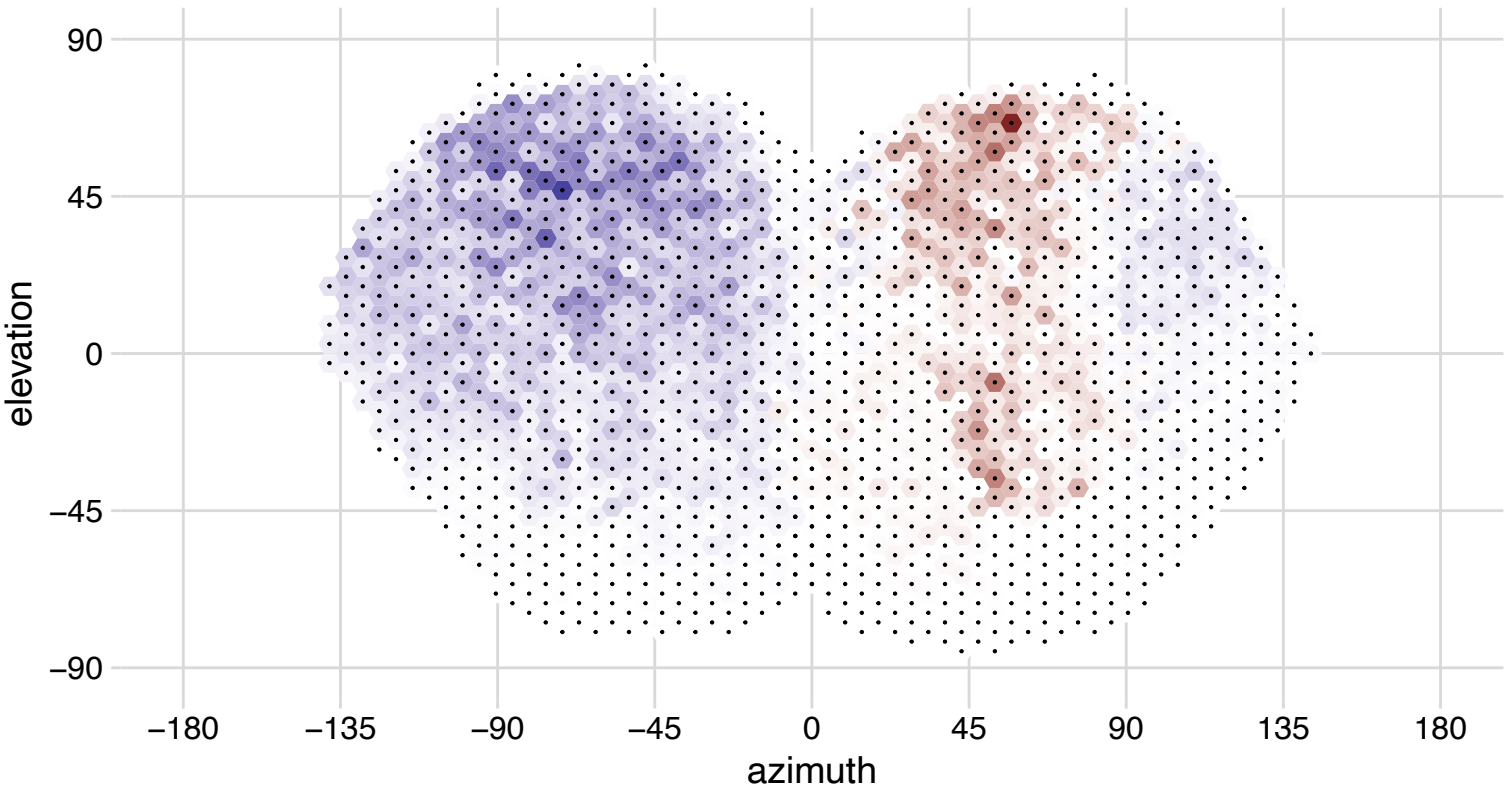



**ER3w\_ab 720575940631248865**

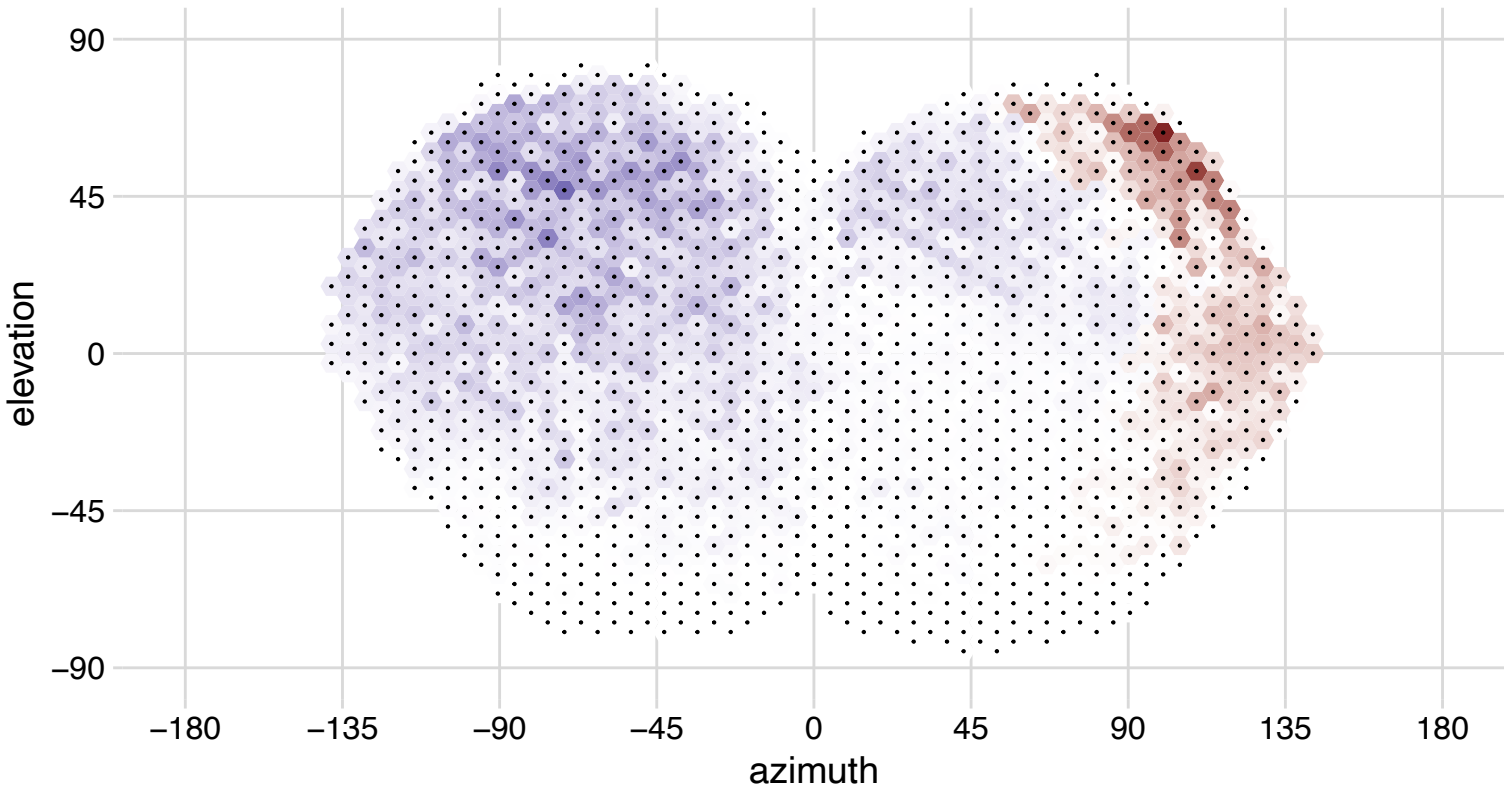

**ER3w\_ab 720575940637681267**

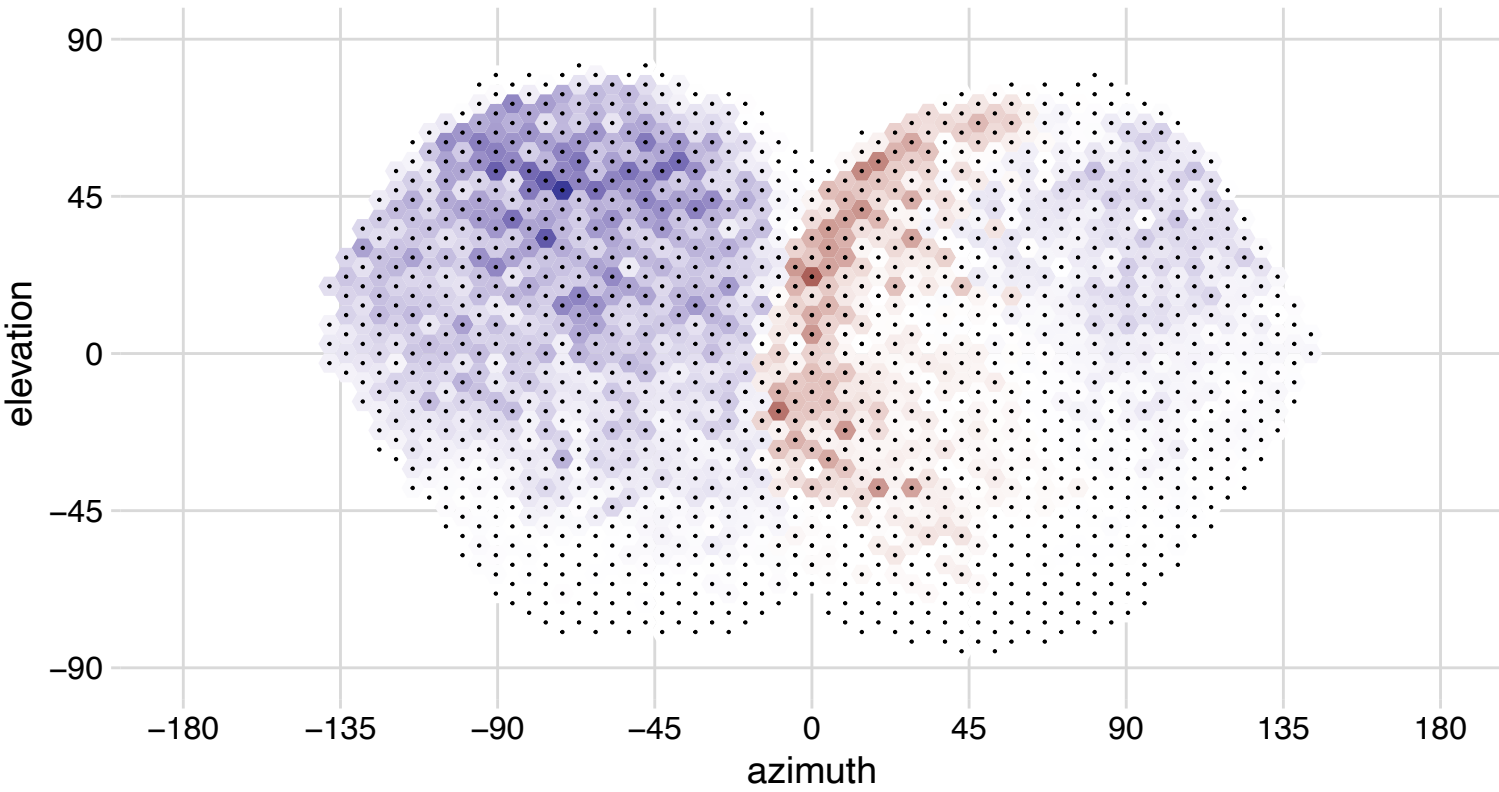

**ER3w\_ab 720575940653326326**

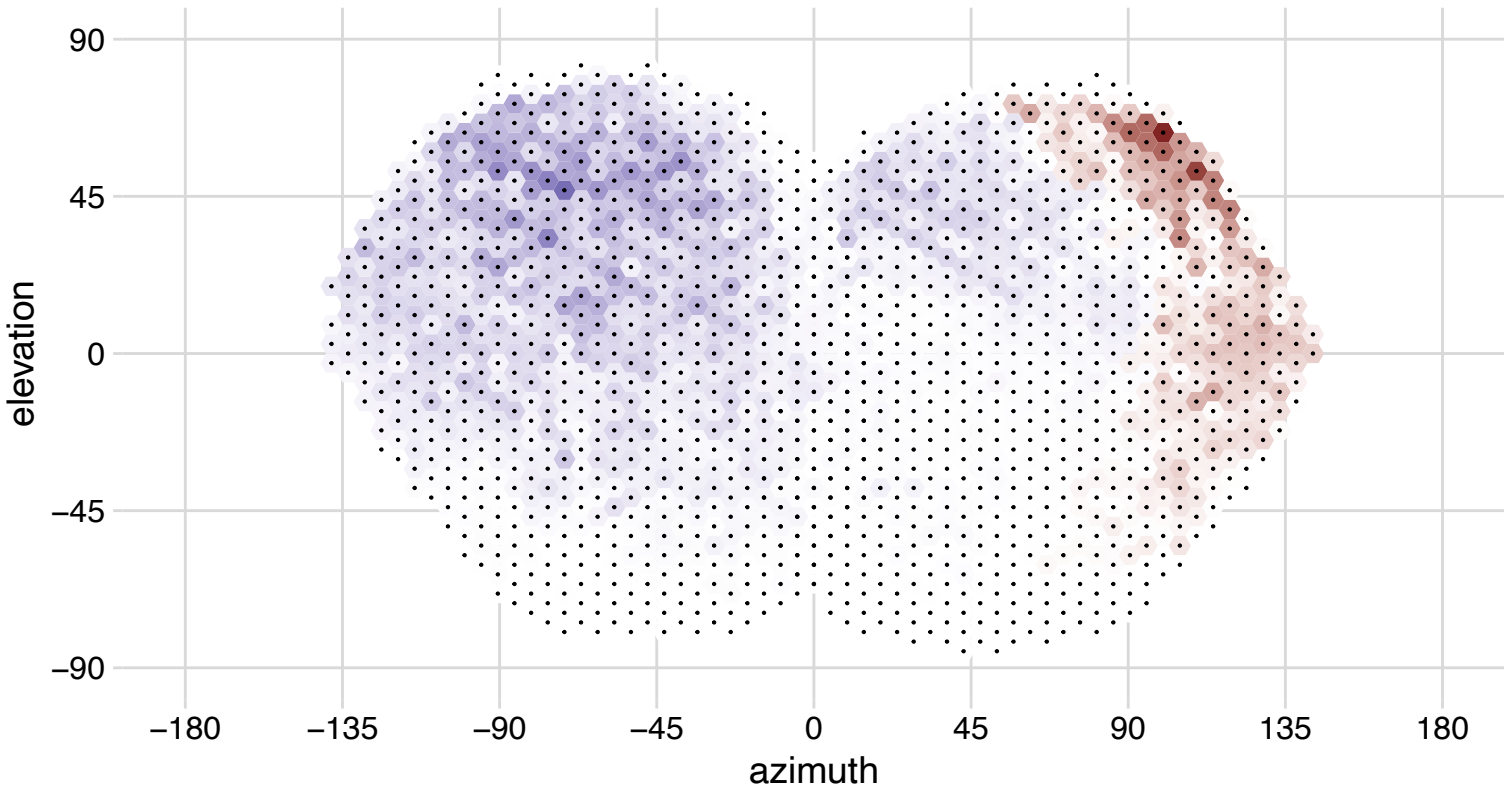

**ER4d 720575940603964774**

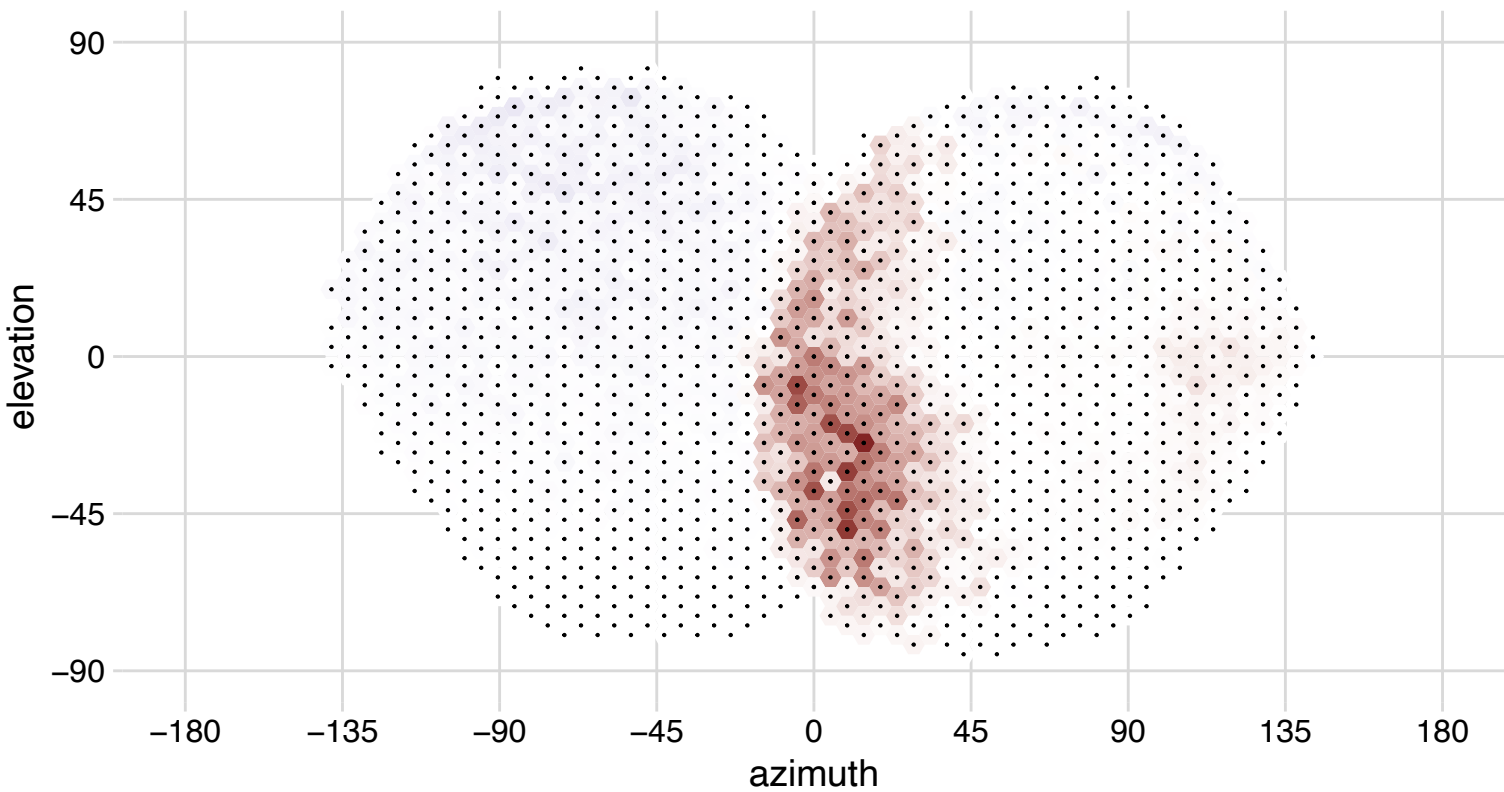

**ER4d 720575940604842924**

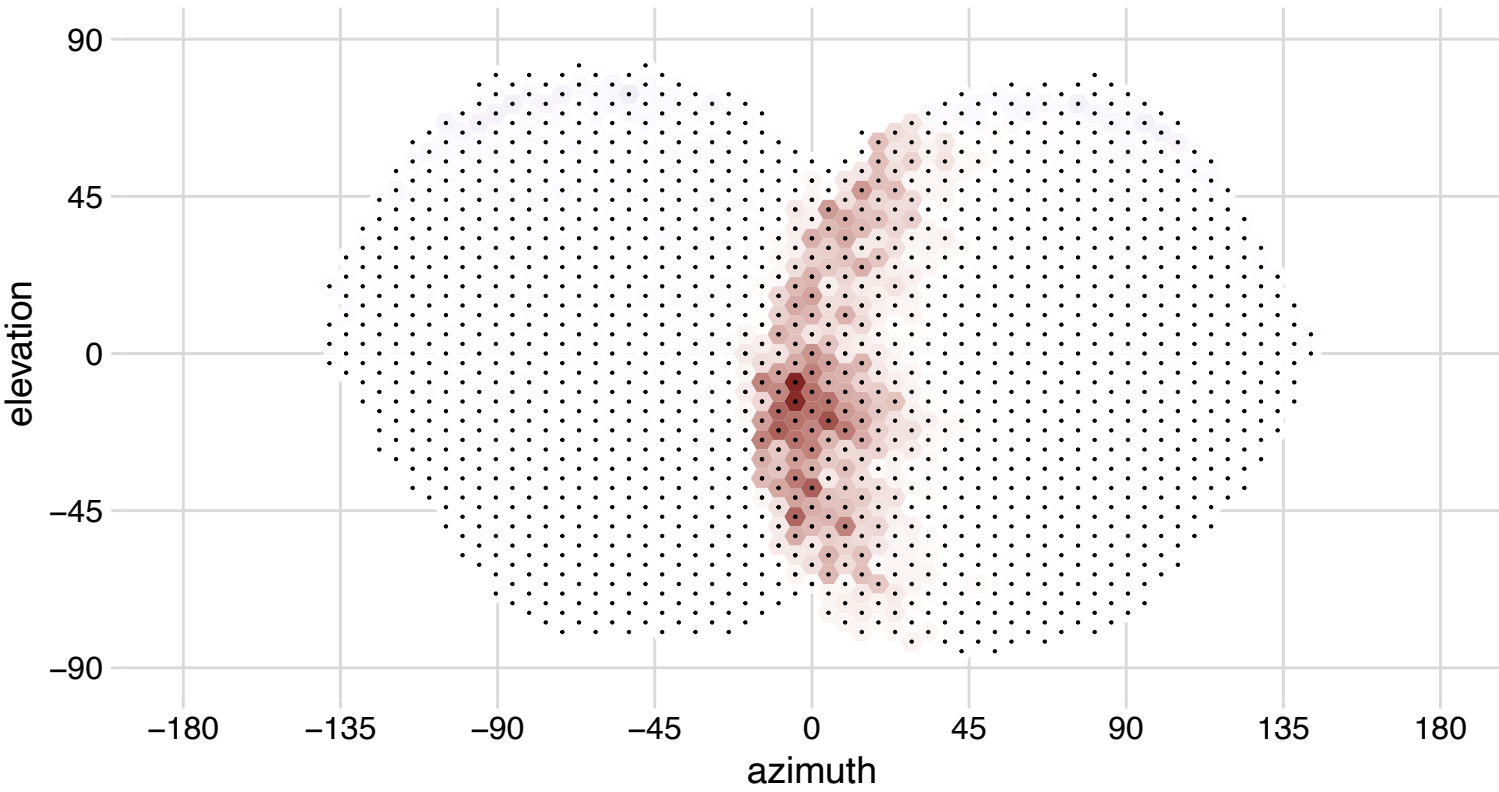

**ER4d 720575940606102729**

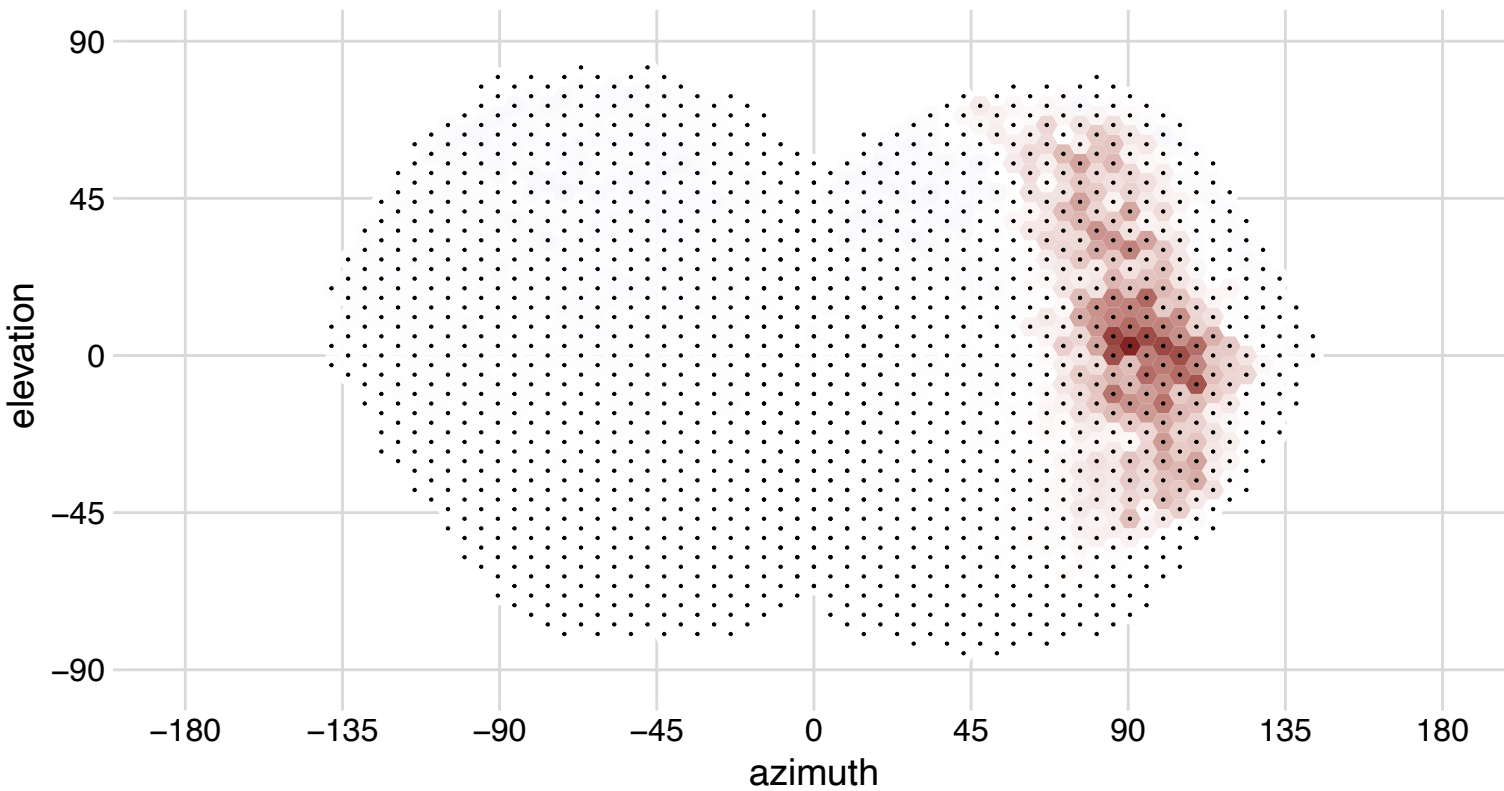

**ER4d 720575940619062357**

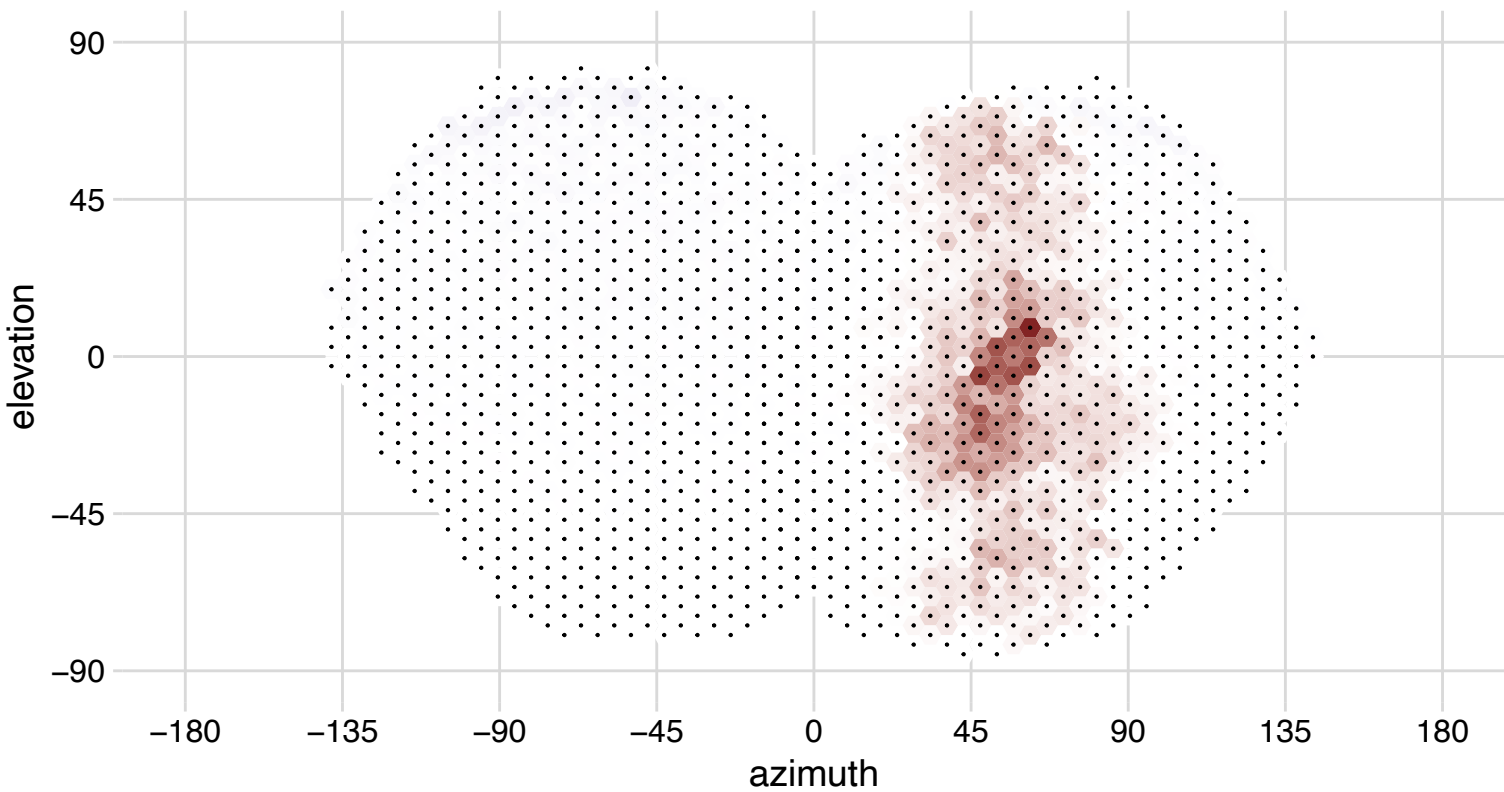

**ER4d 720575940619320917**

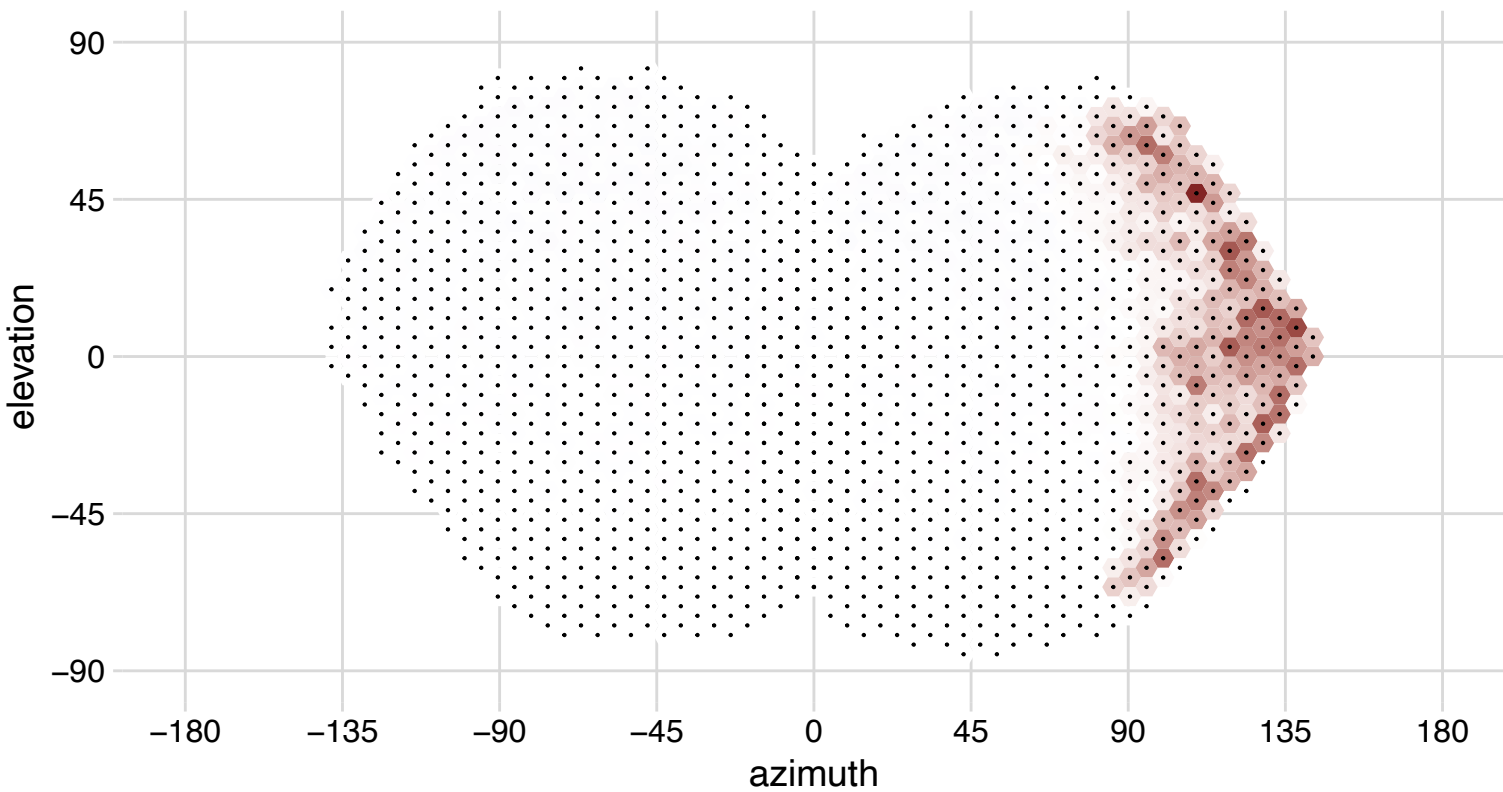



**ER4d 720575940623219463**

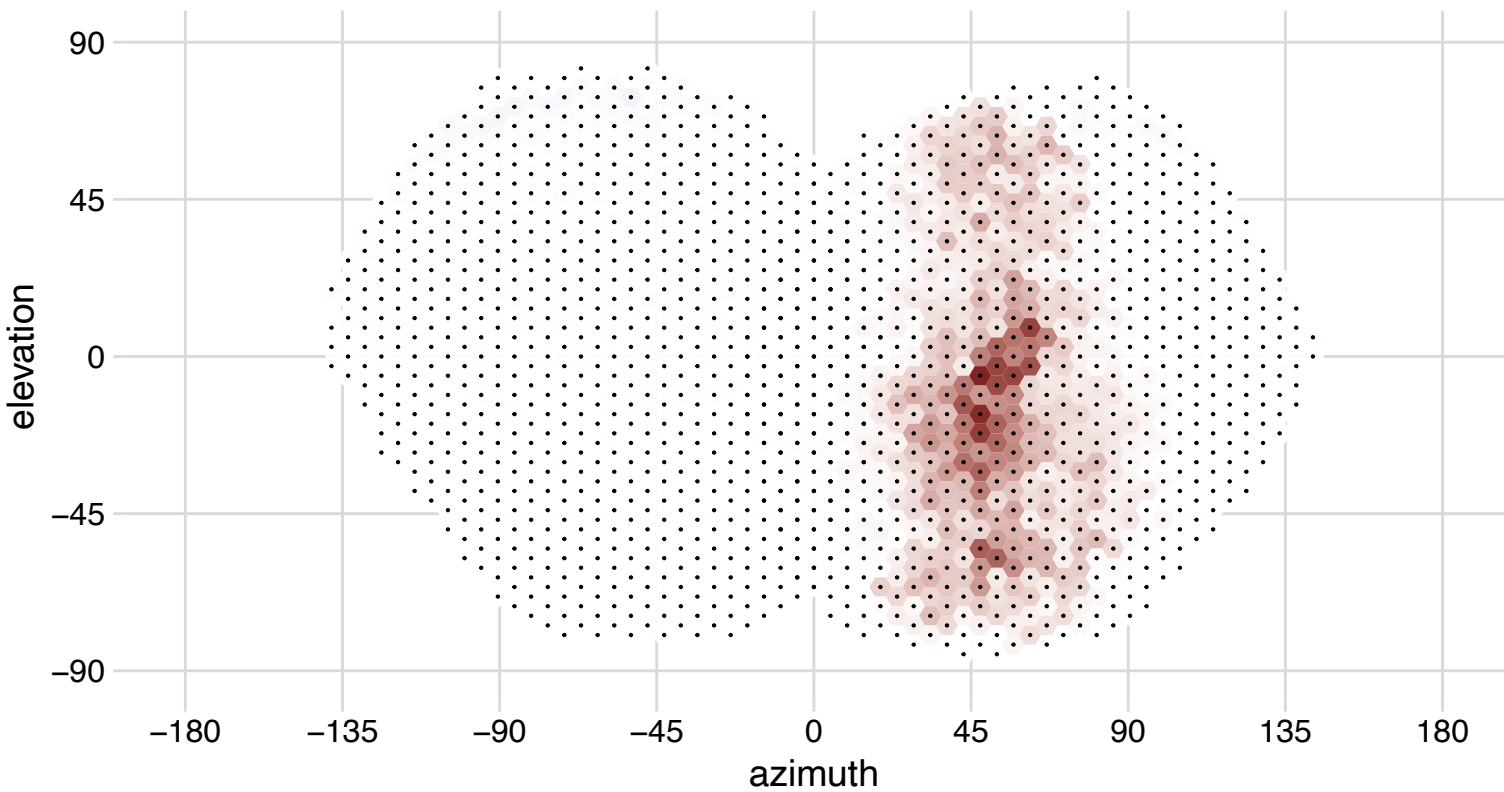

**ER4d 720575940624373837**

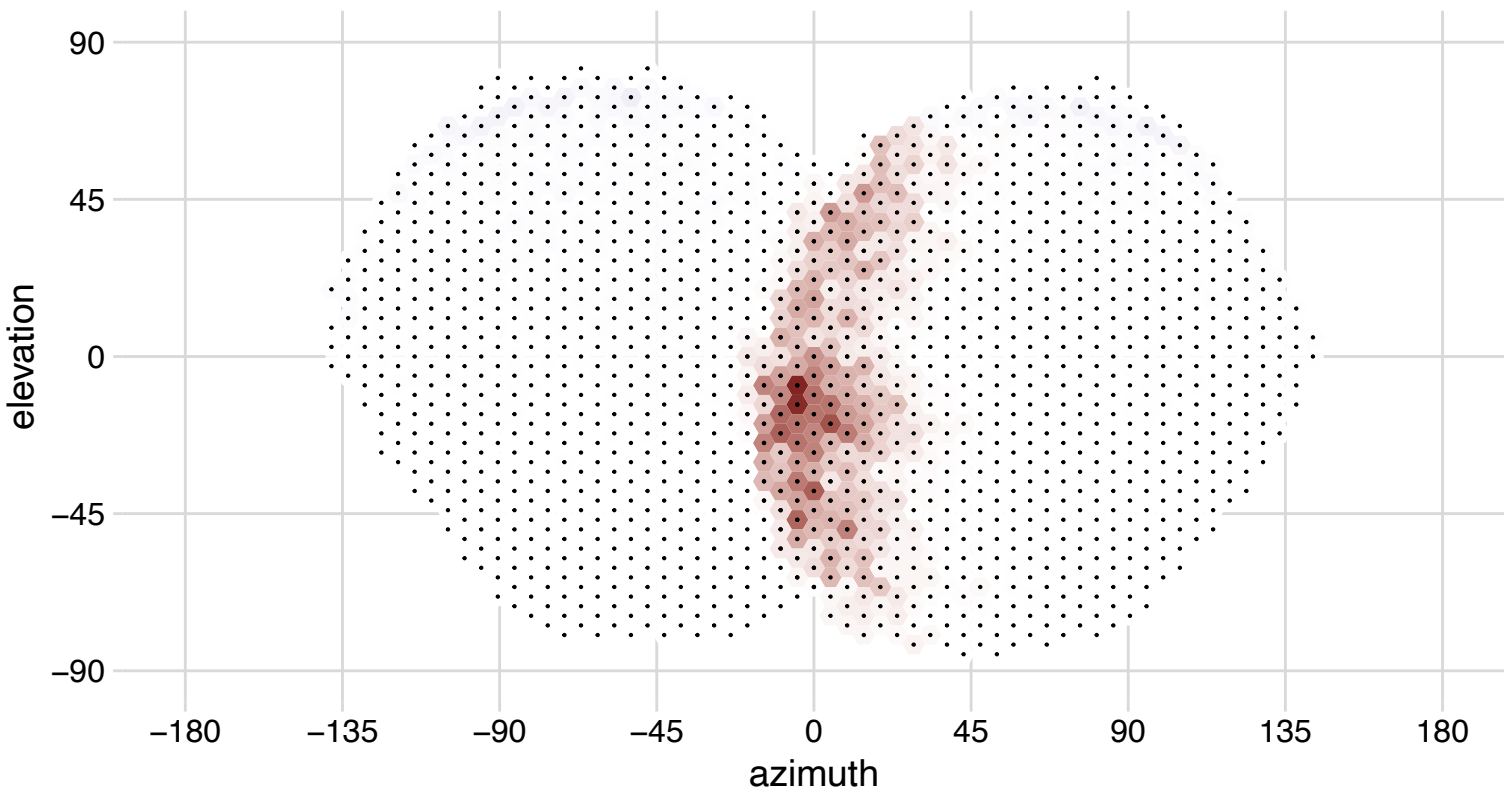

**ER4d 720575940625511762**

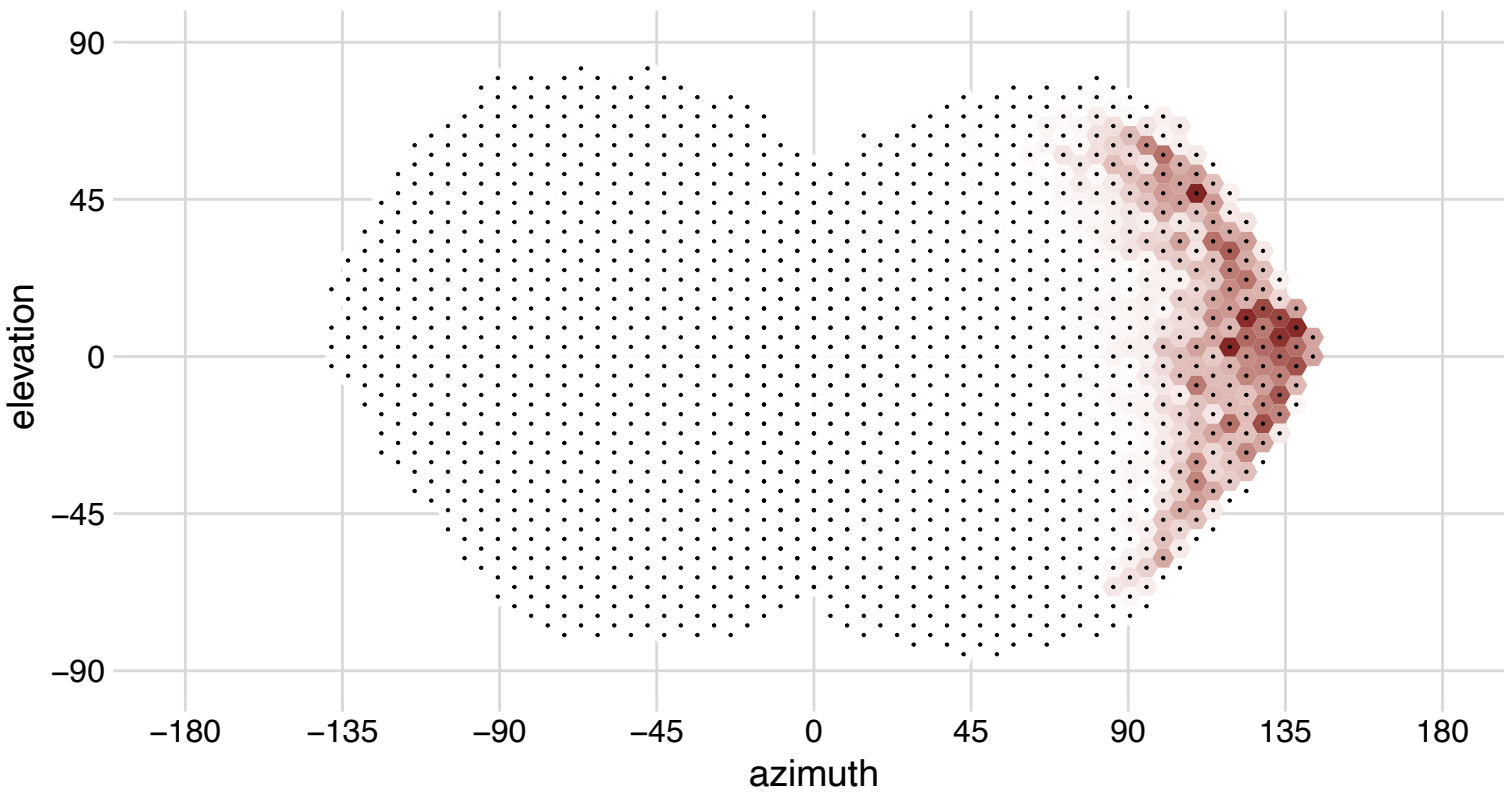

**ER4d 720575940629720848**

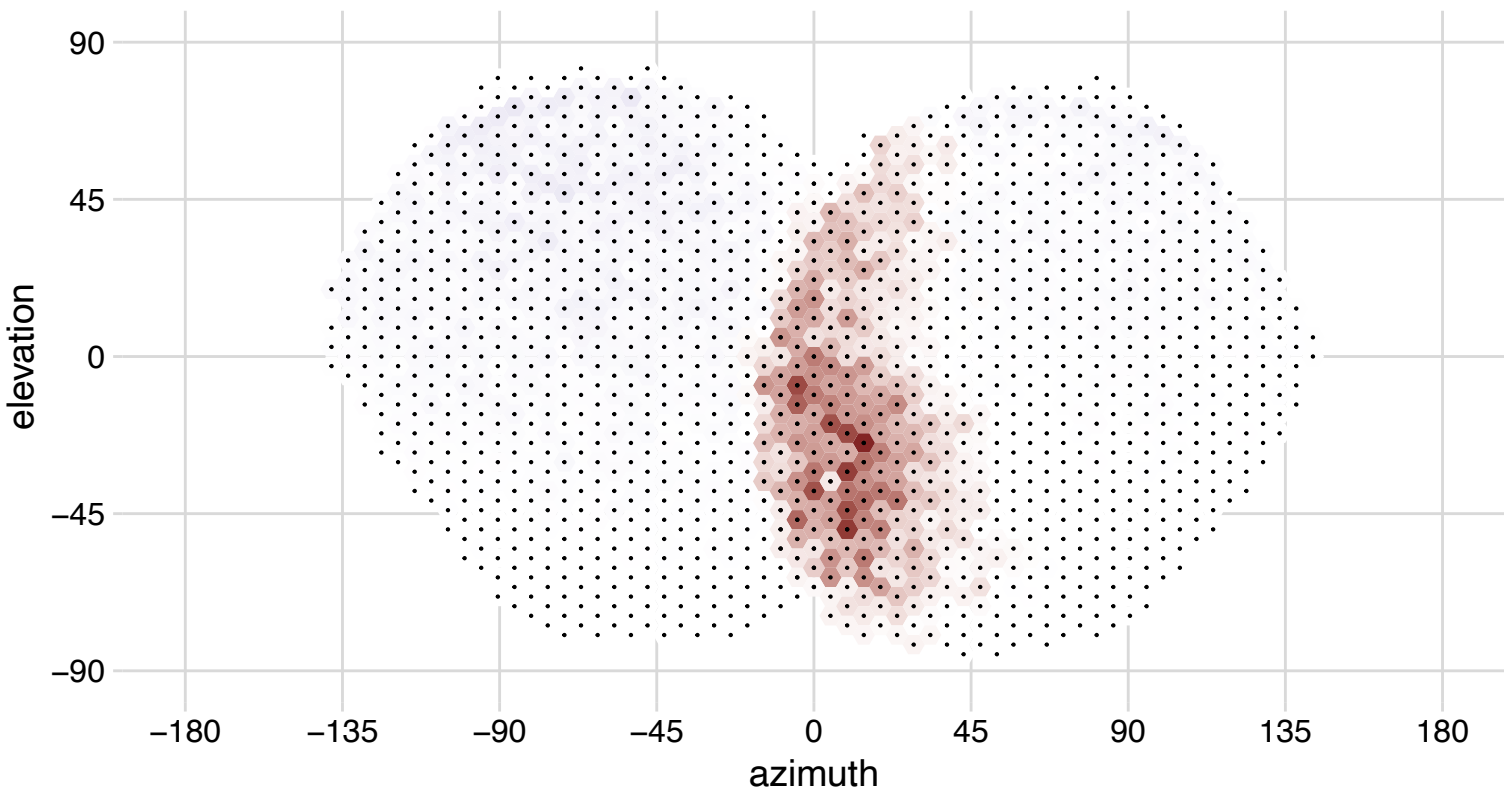

**ER4d 720575940631364716**

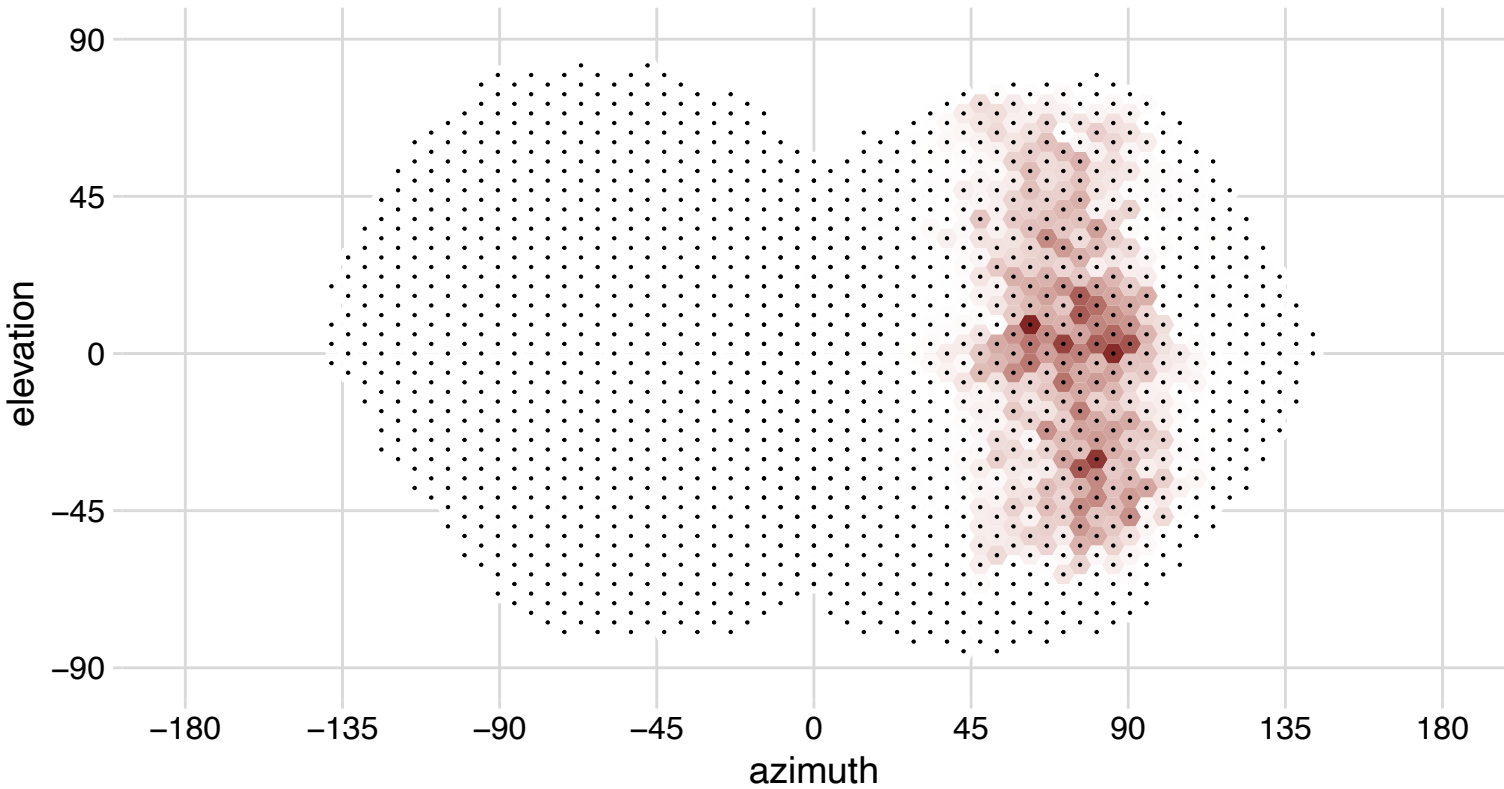

**ER4d 720575940635290992**

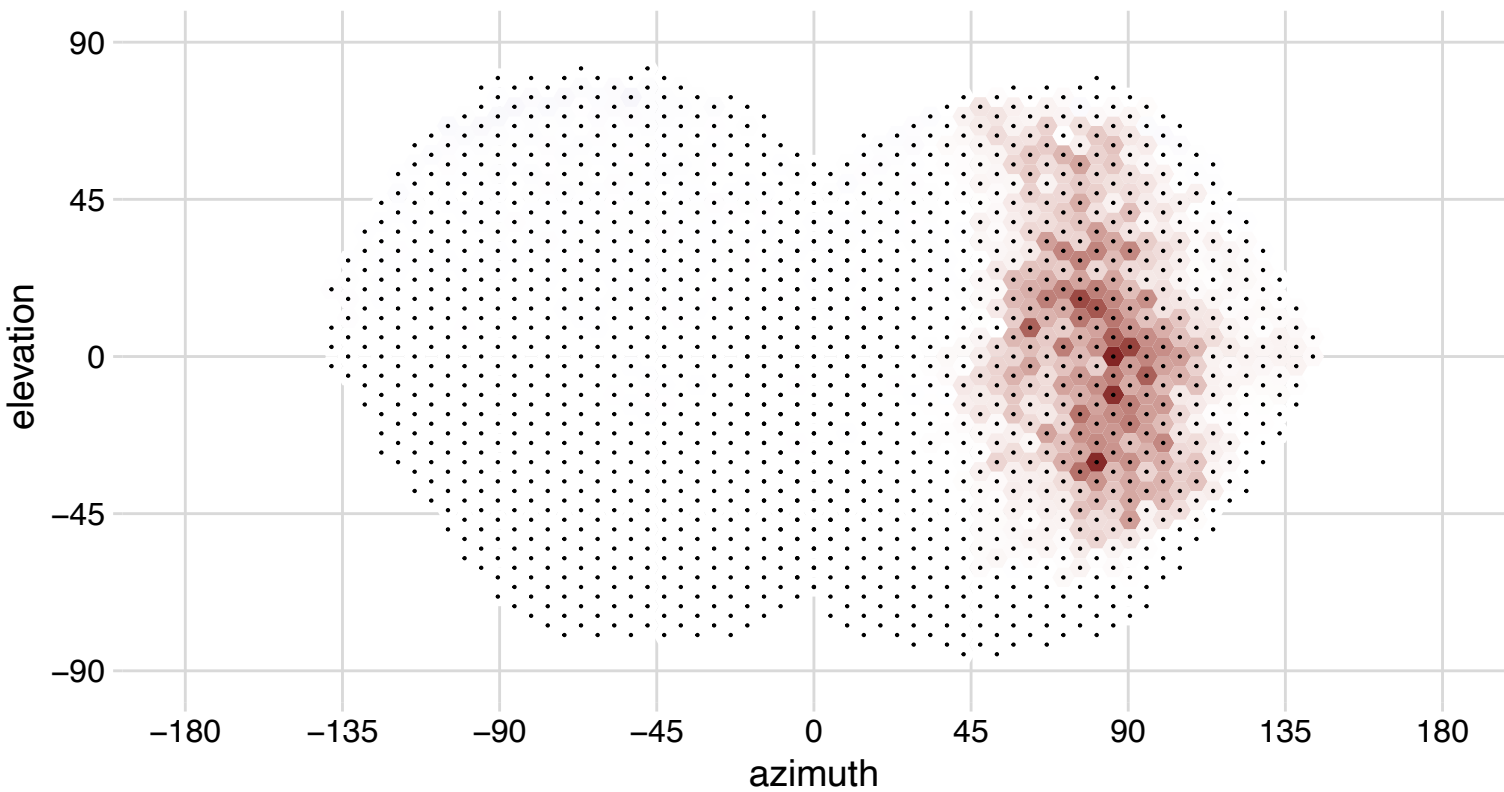

**ER4d 720575940642877088**

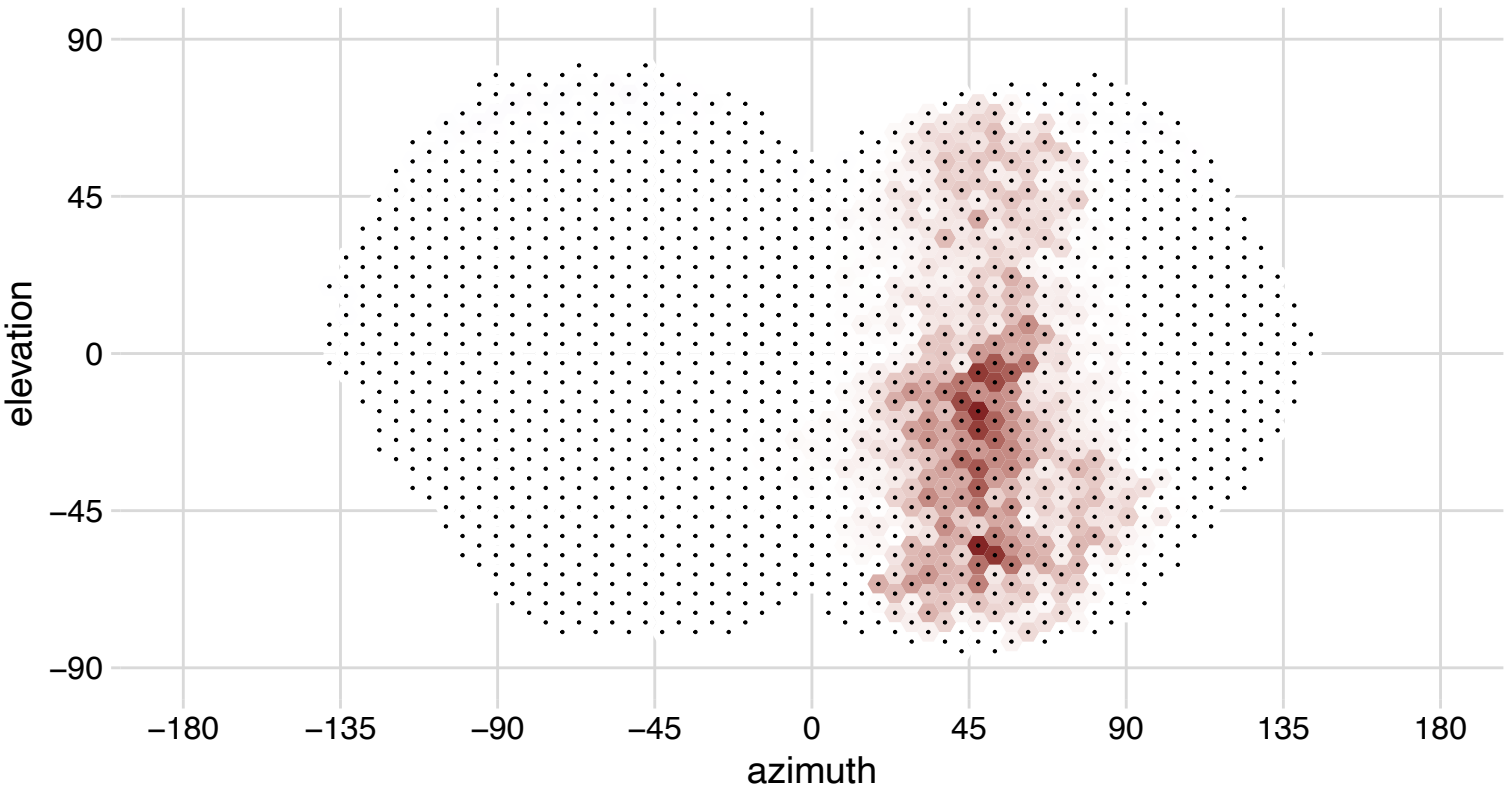

**ER4d 720575940643915300**

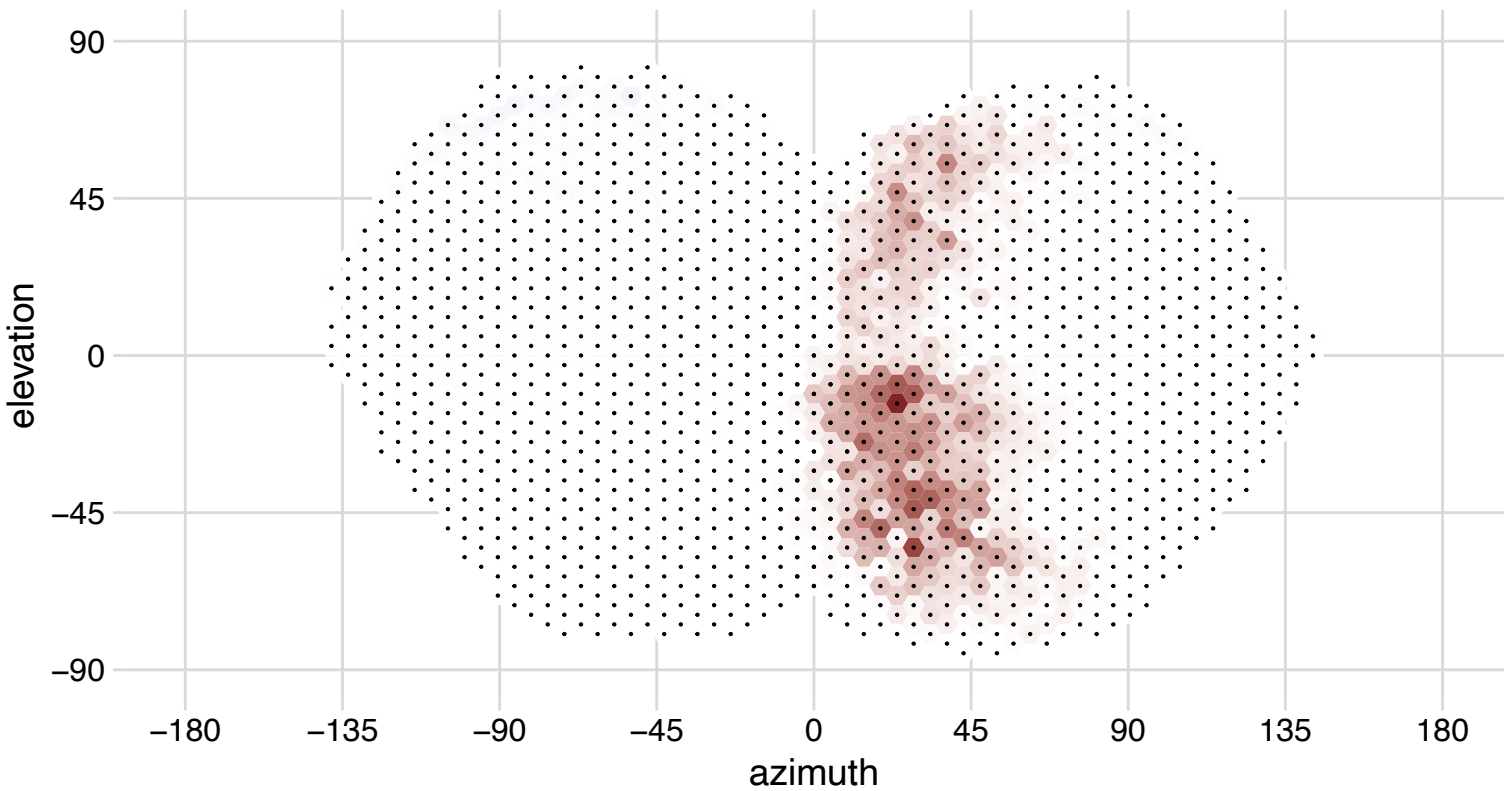



**ER4m 720575940615712735**

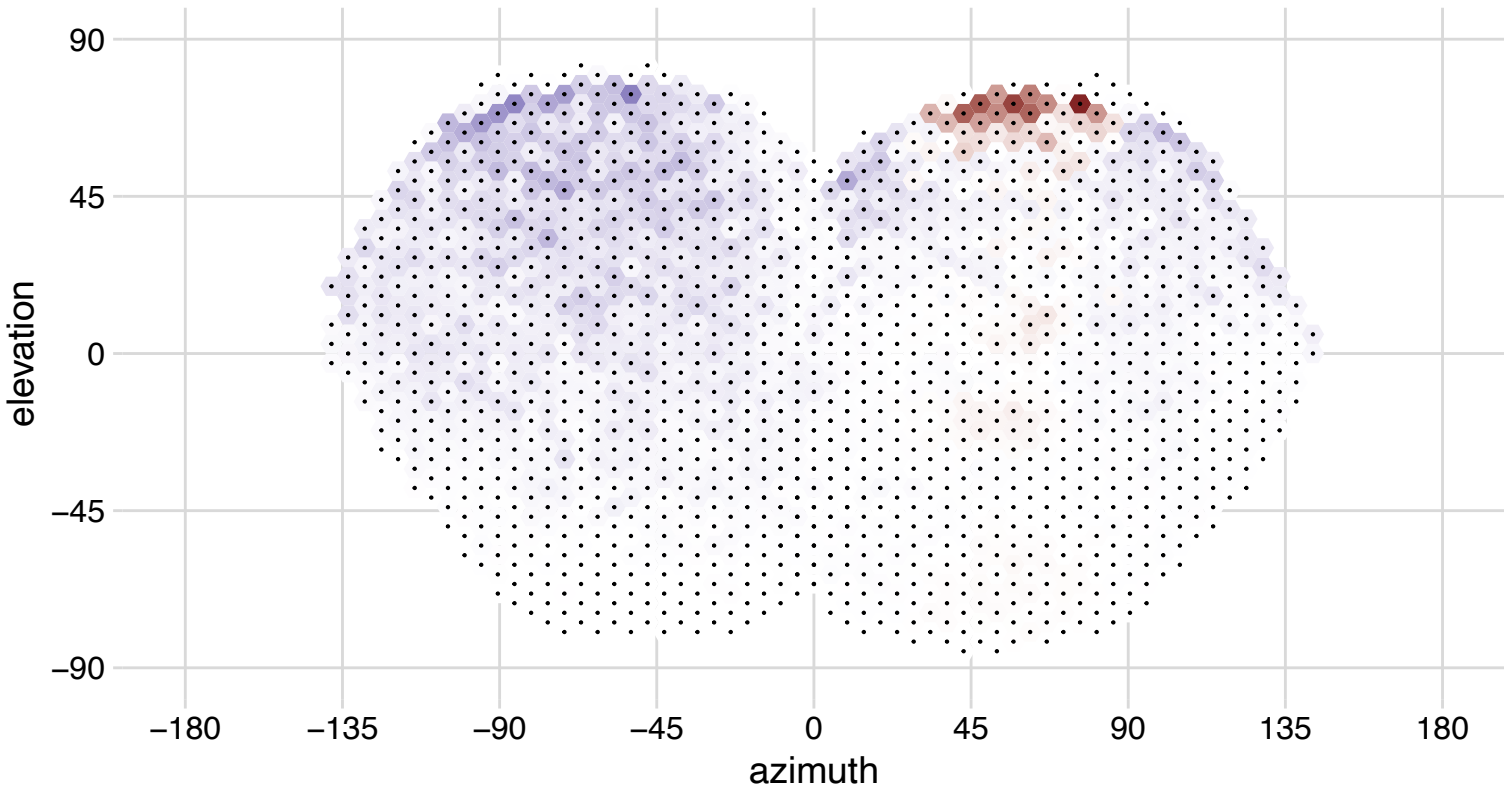

**ER4m 720575940619436342**

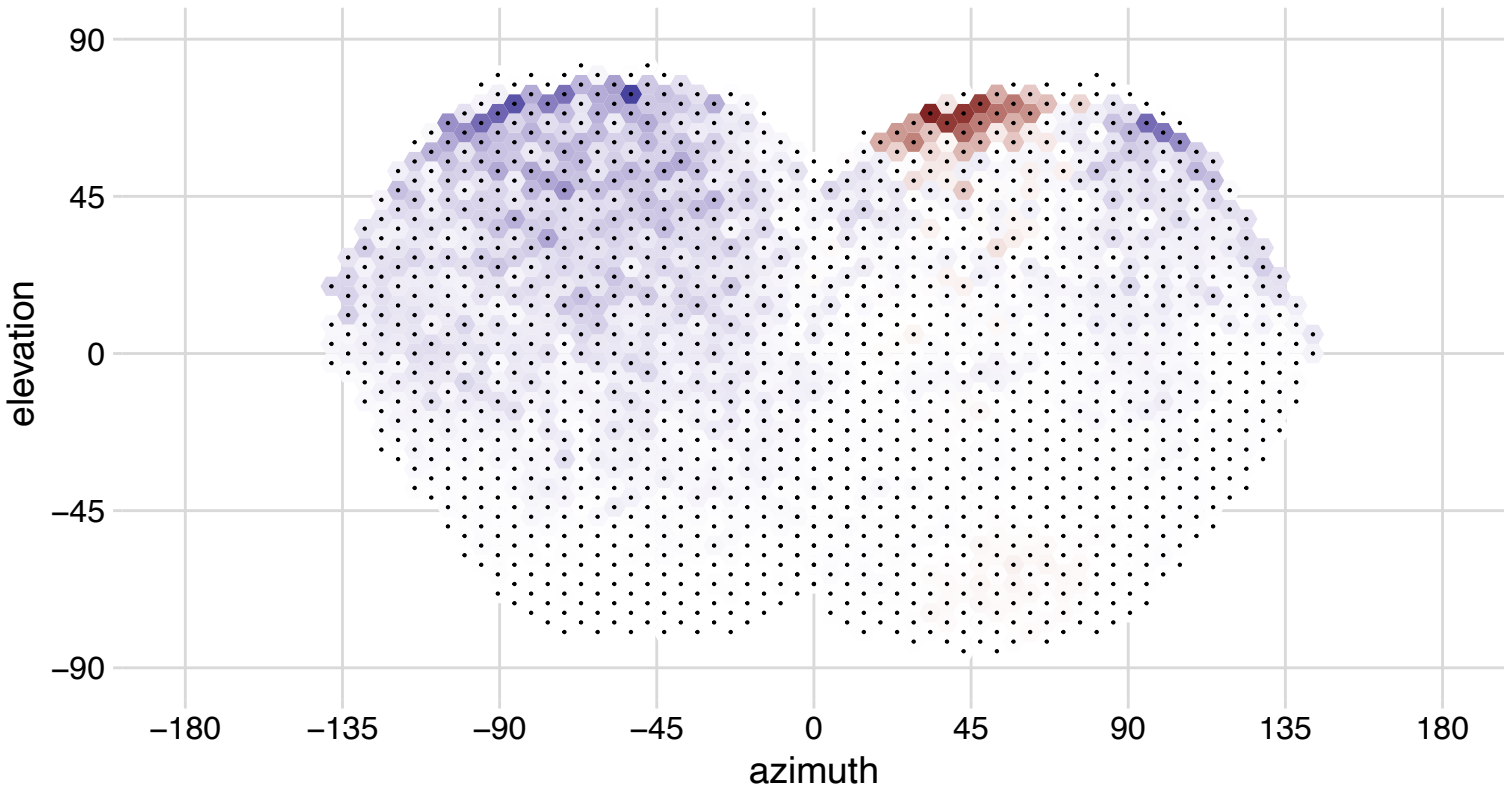

**ER4m 720575940622043830**

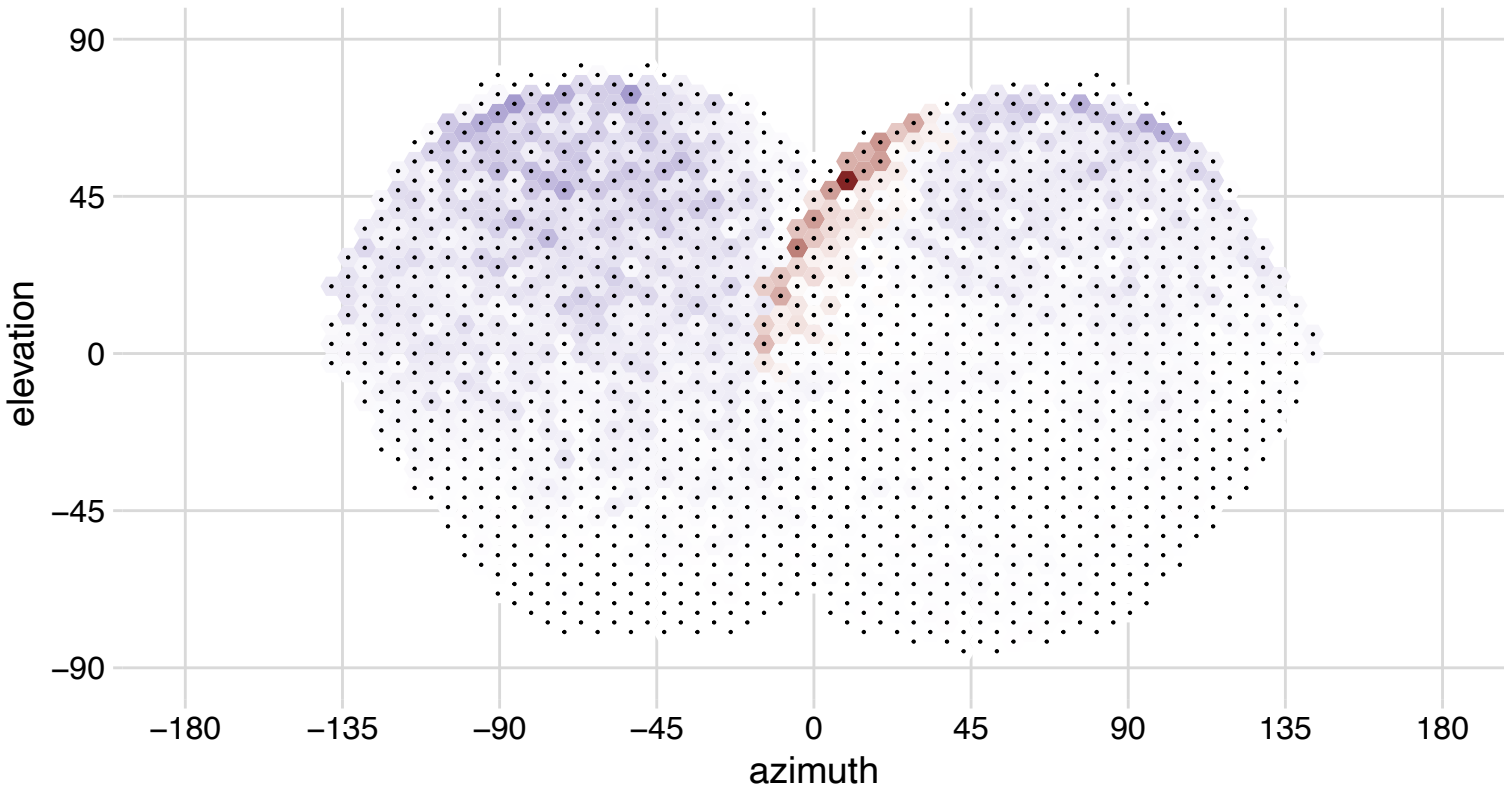

**ER4m 720575940634096339**

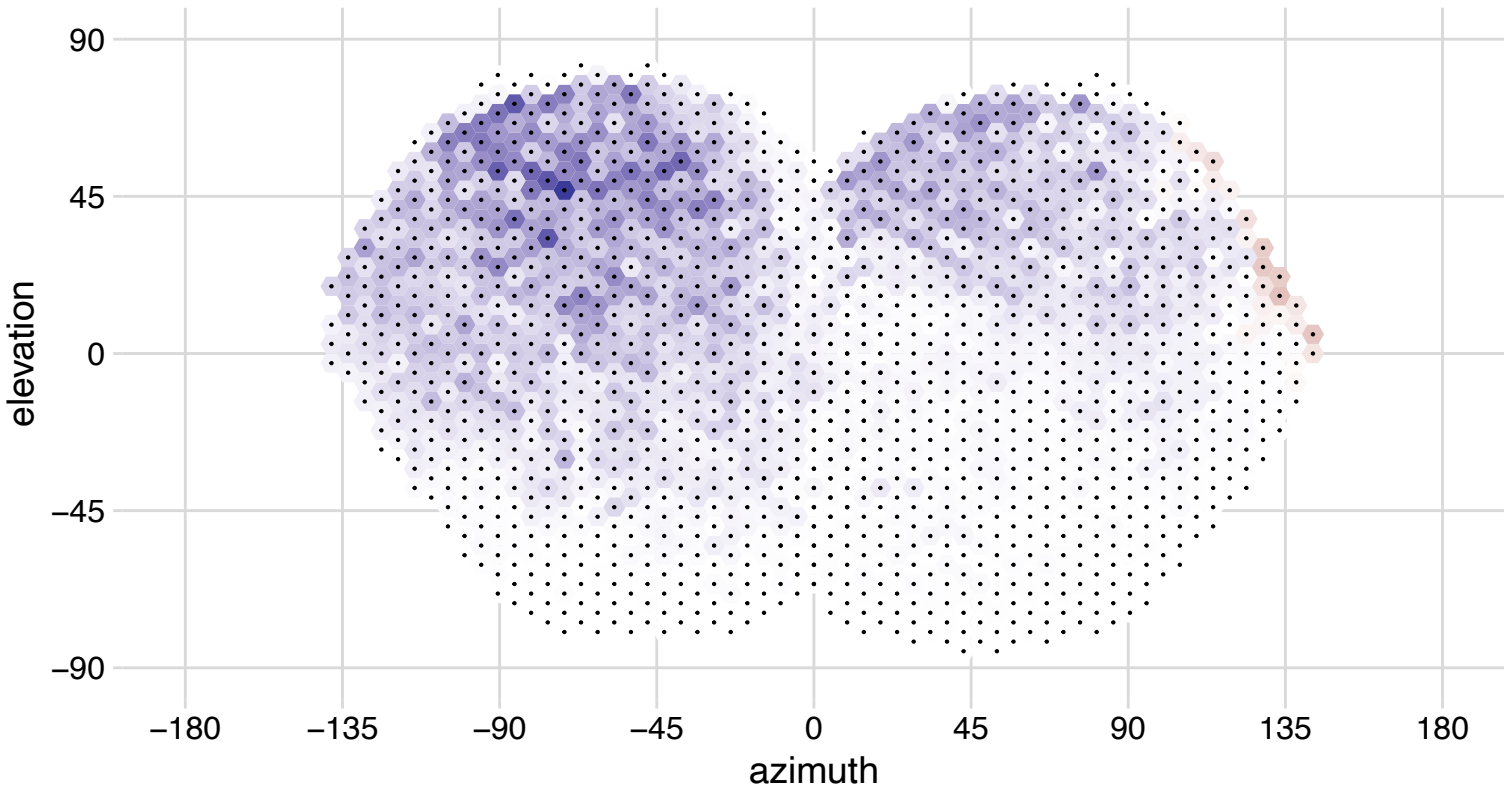

**ER4m 720575940635759002**

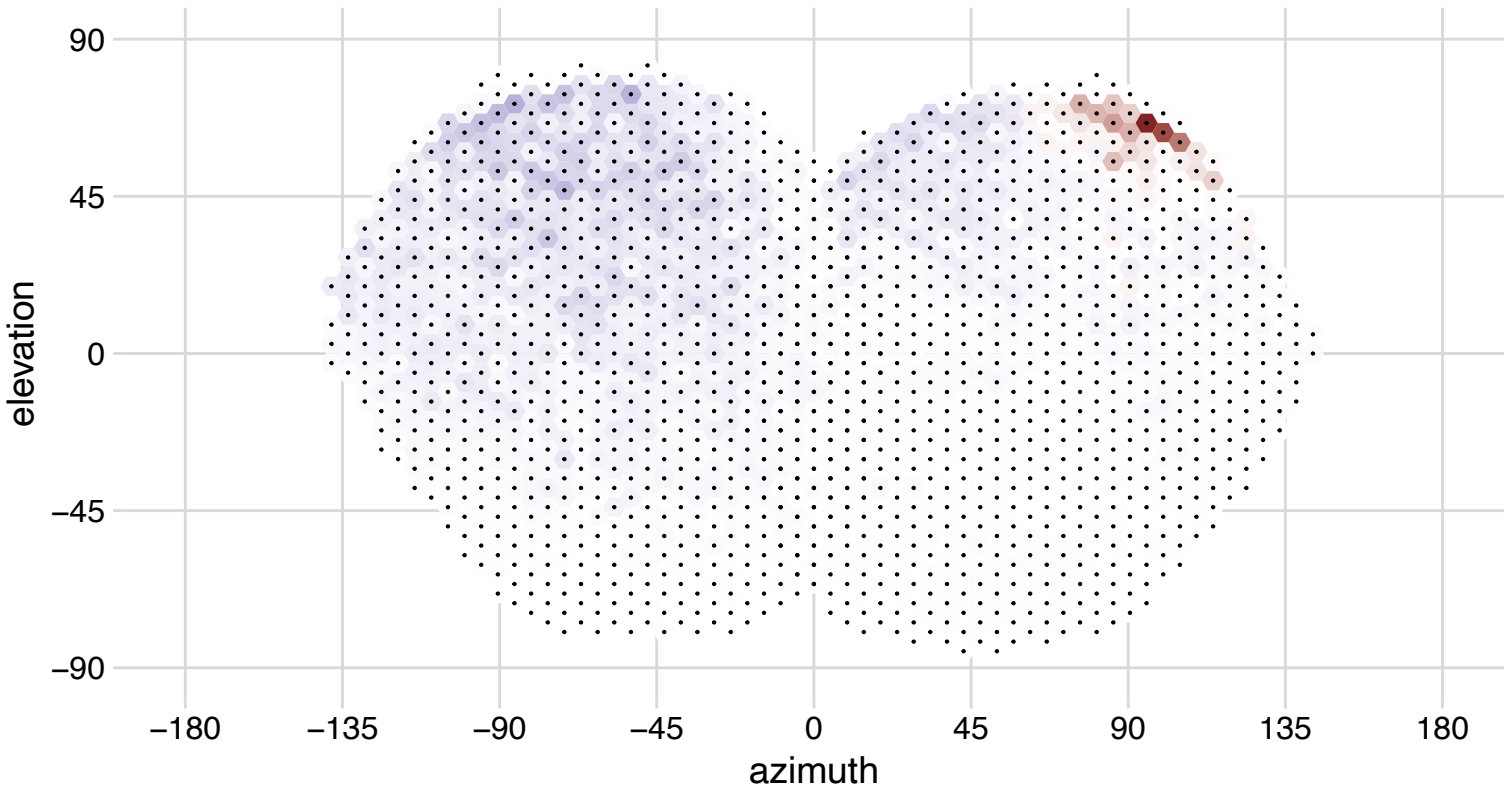

**ER5 720575940615650022**

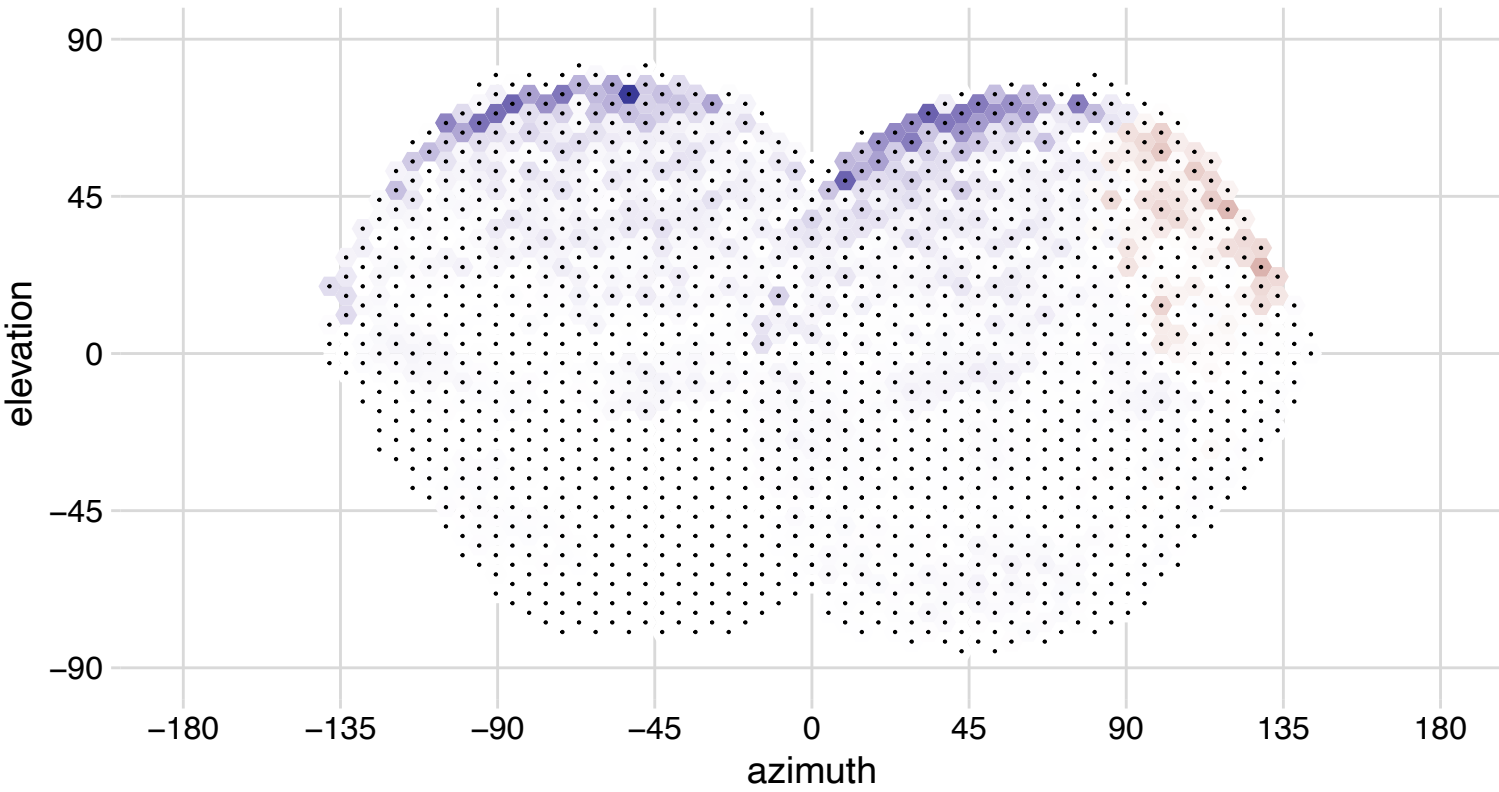

**ER5 720575940620940045**

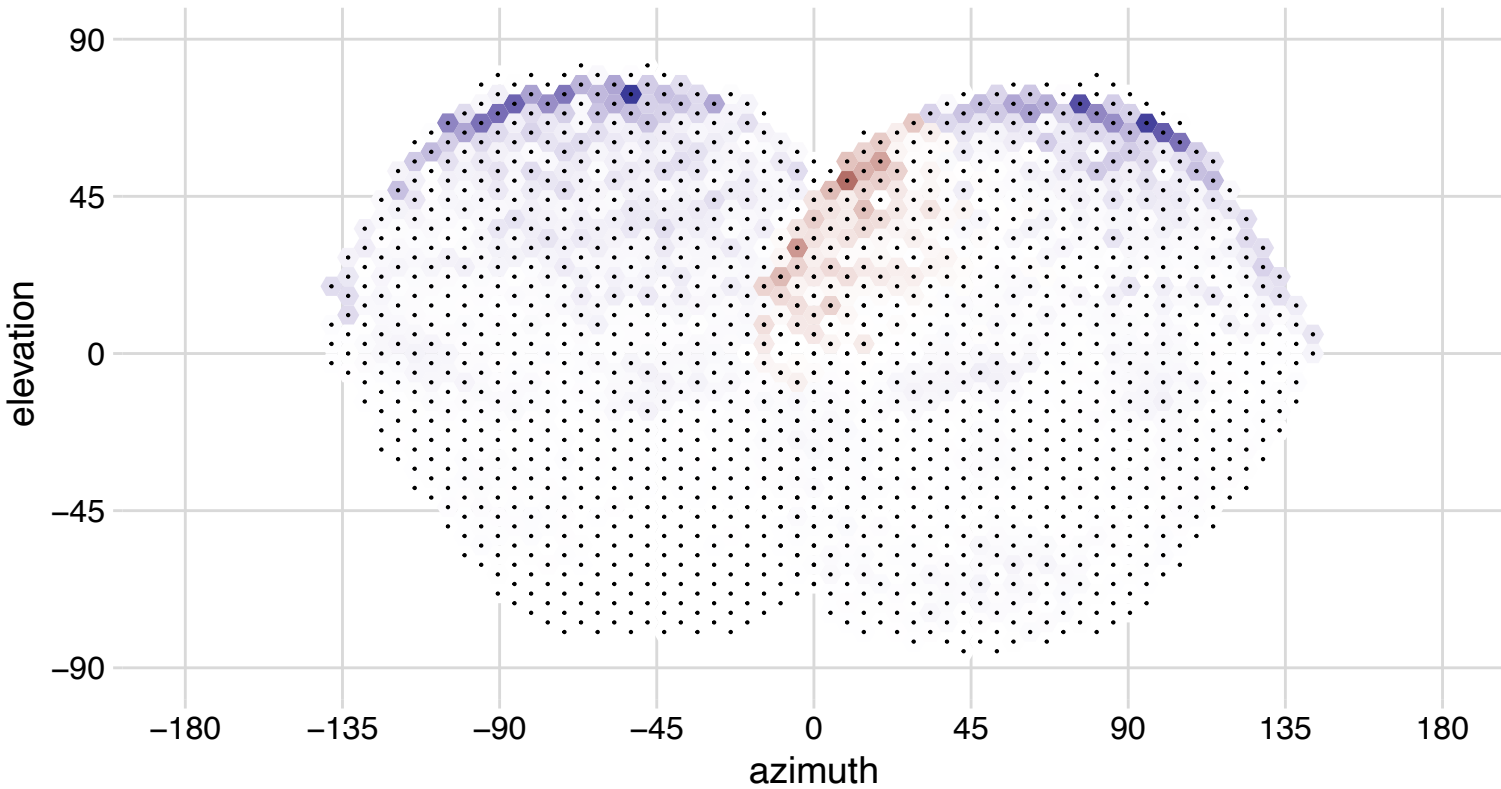

**ER5 720575940621209980**

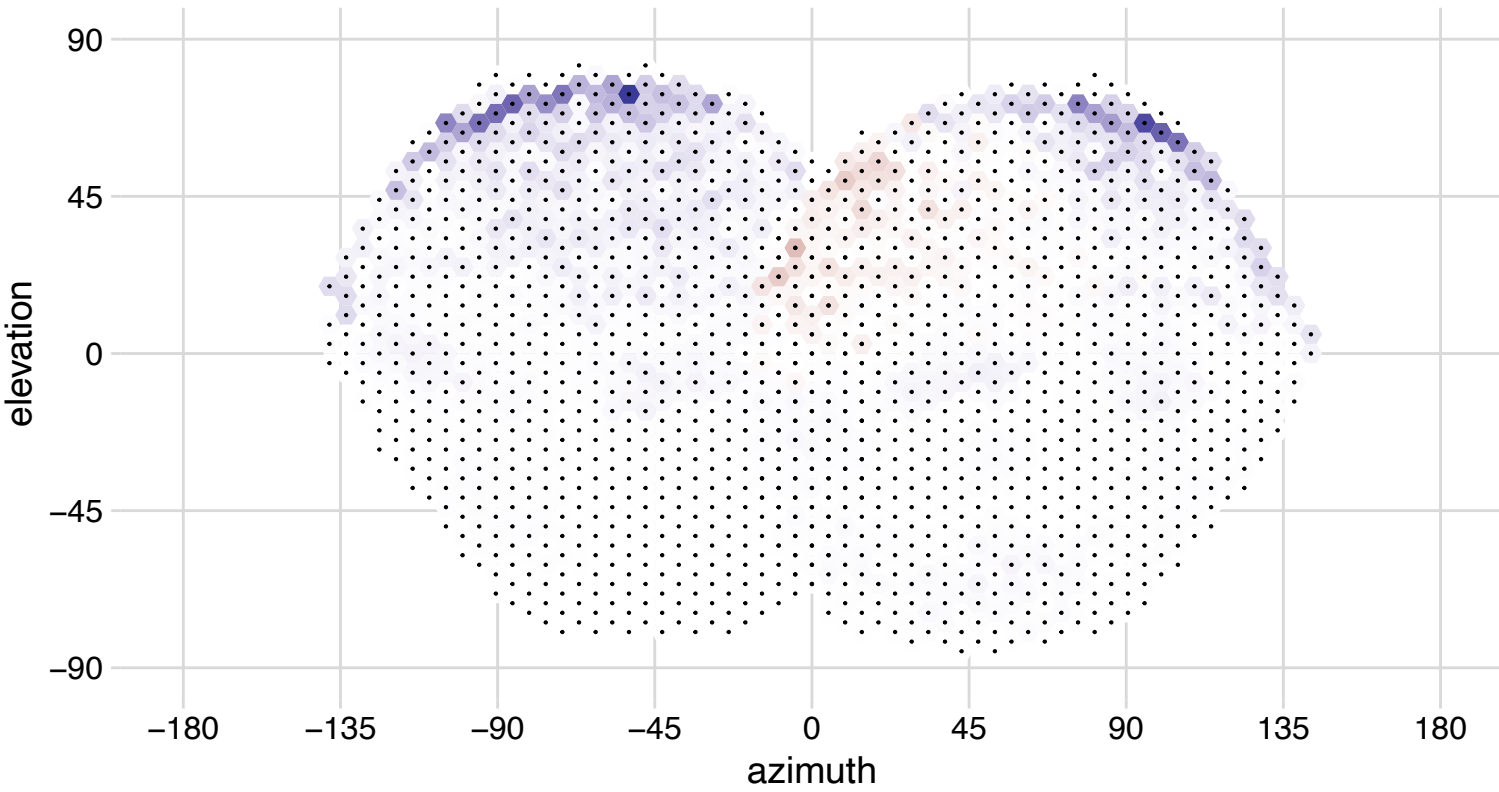



**ER5 720575940624837453**

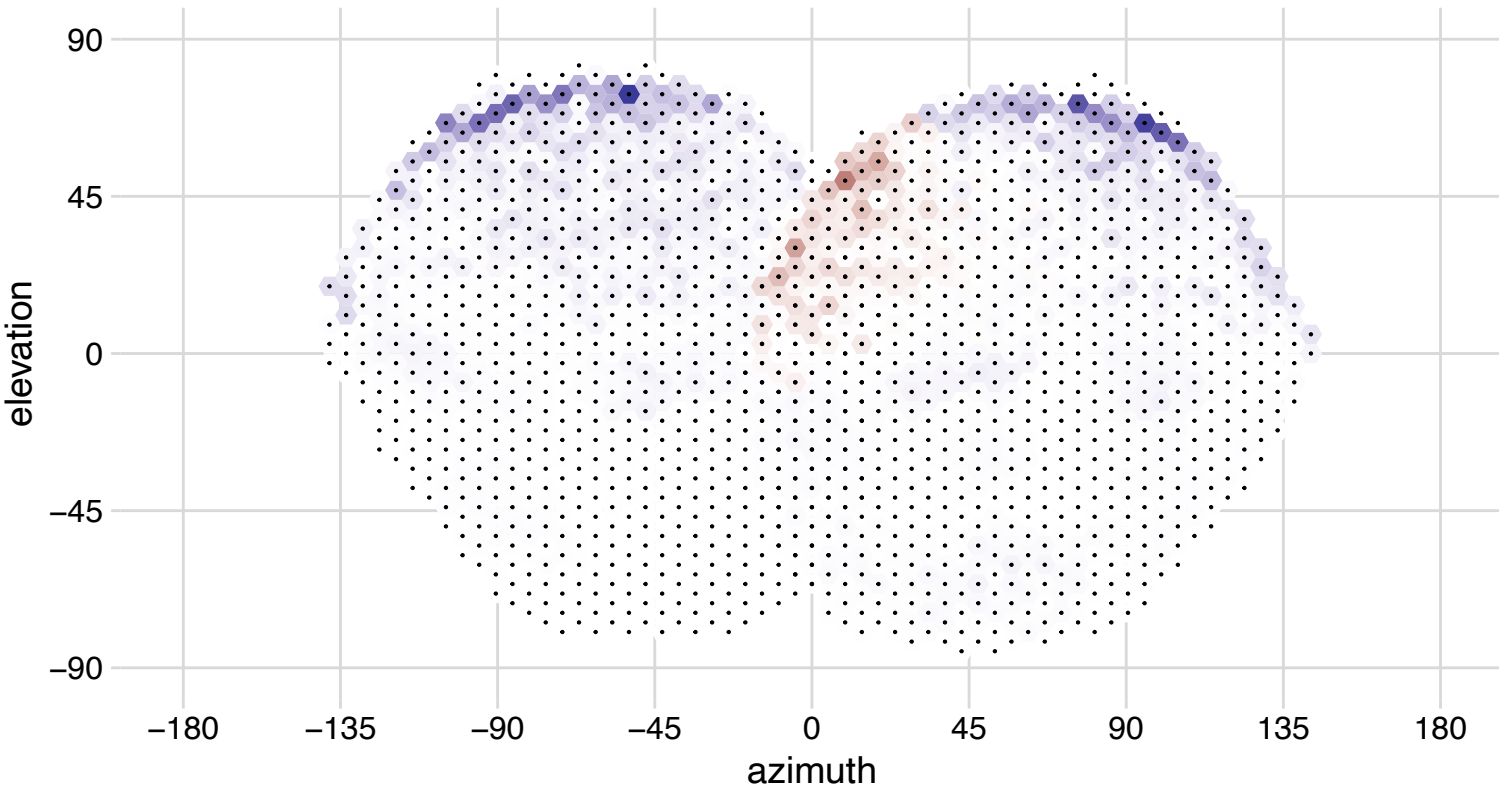

**ER5 720575940625829192**

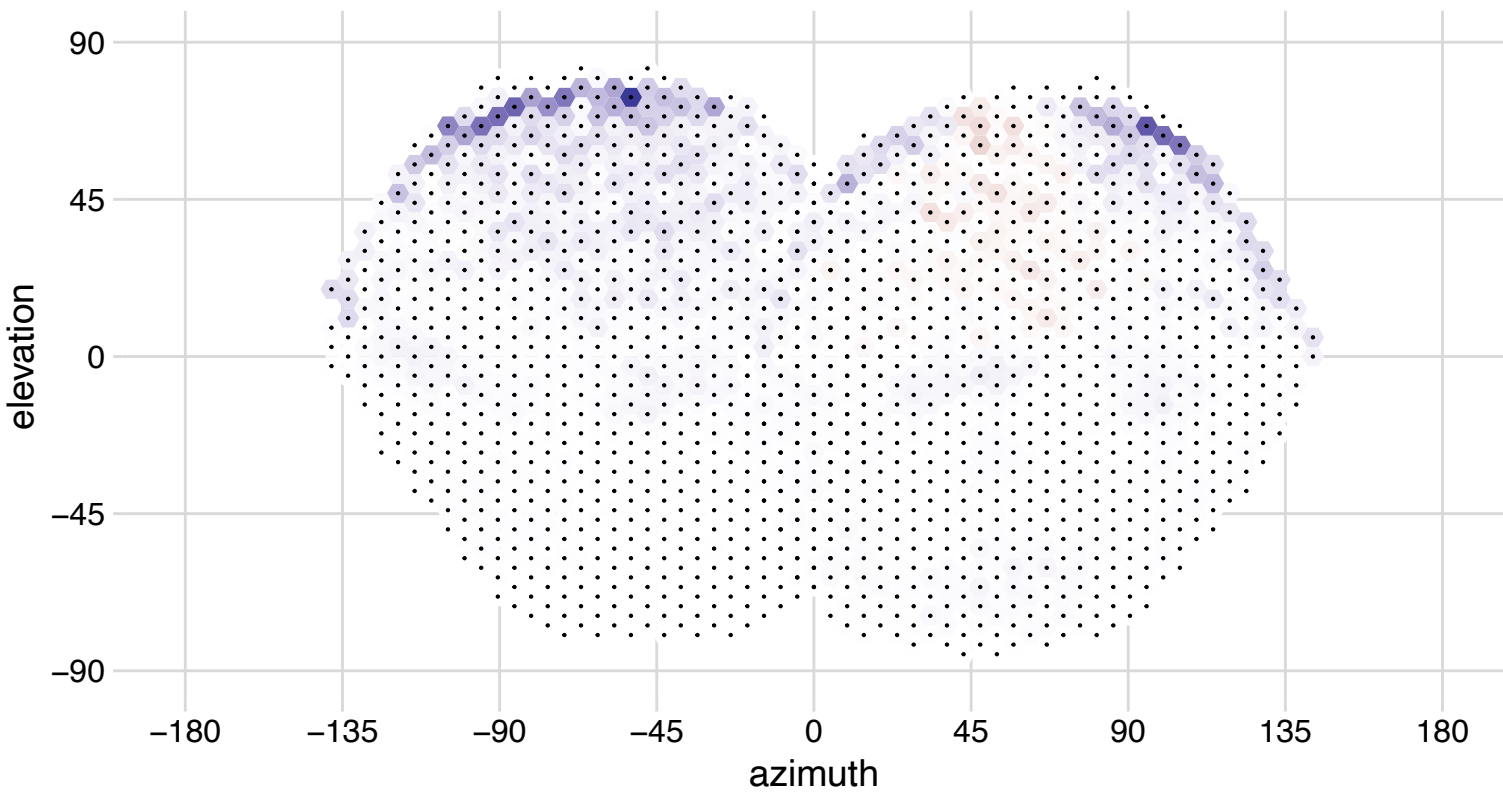

**ER5 720575940626610960**

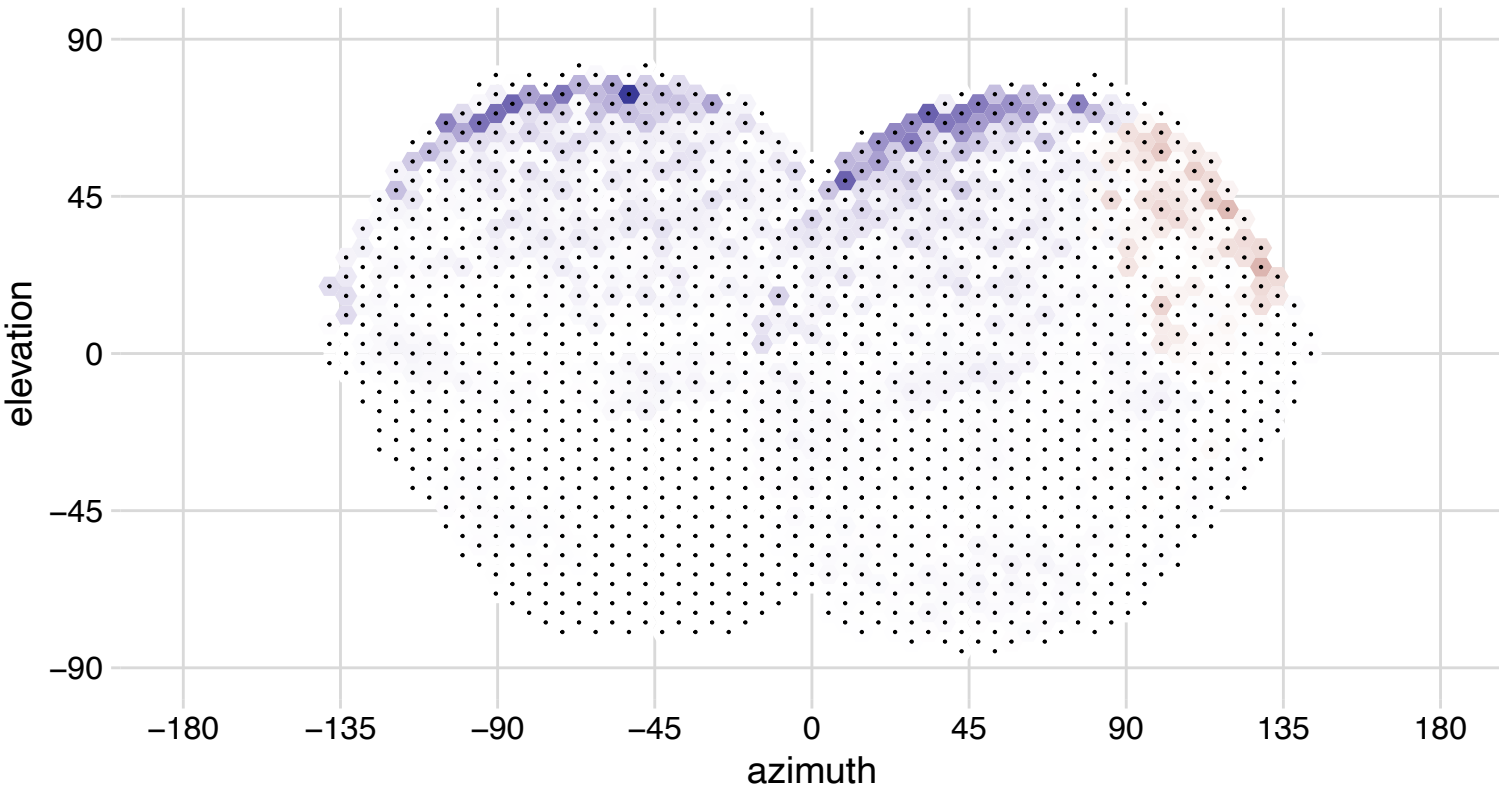

**ER5 720575940628772345**

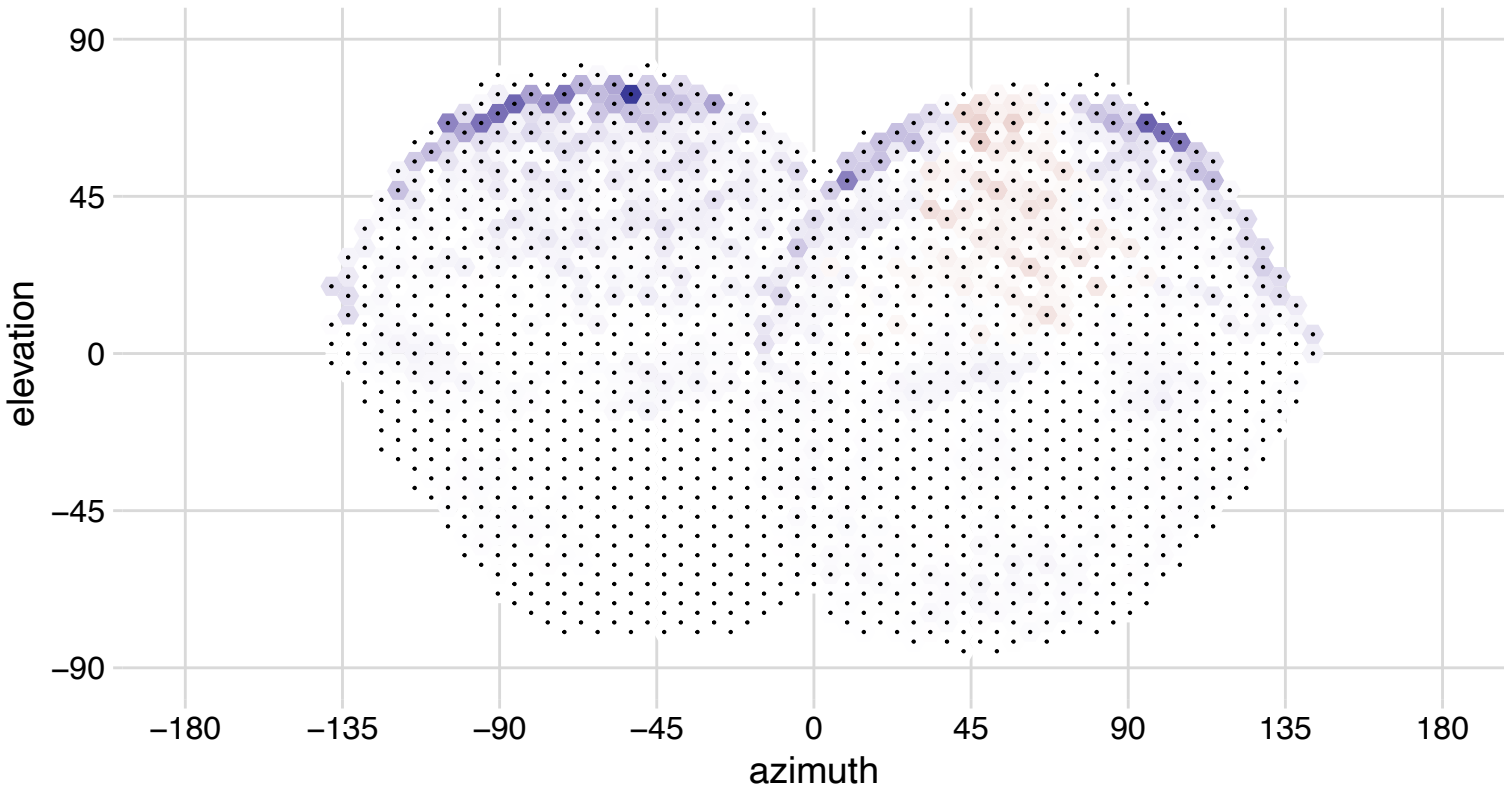

**ER5 720575940631416057**

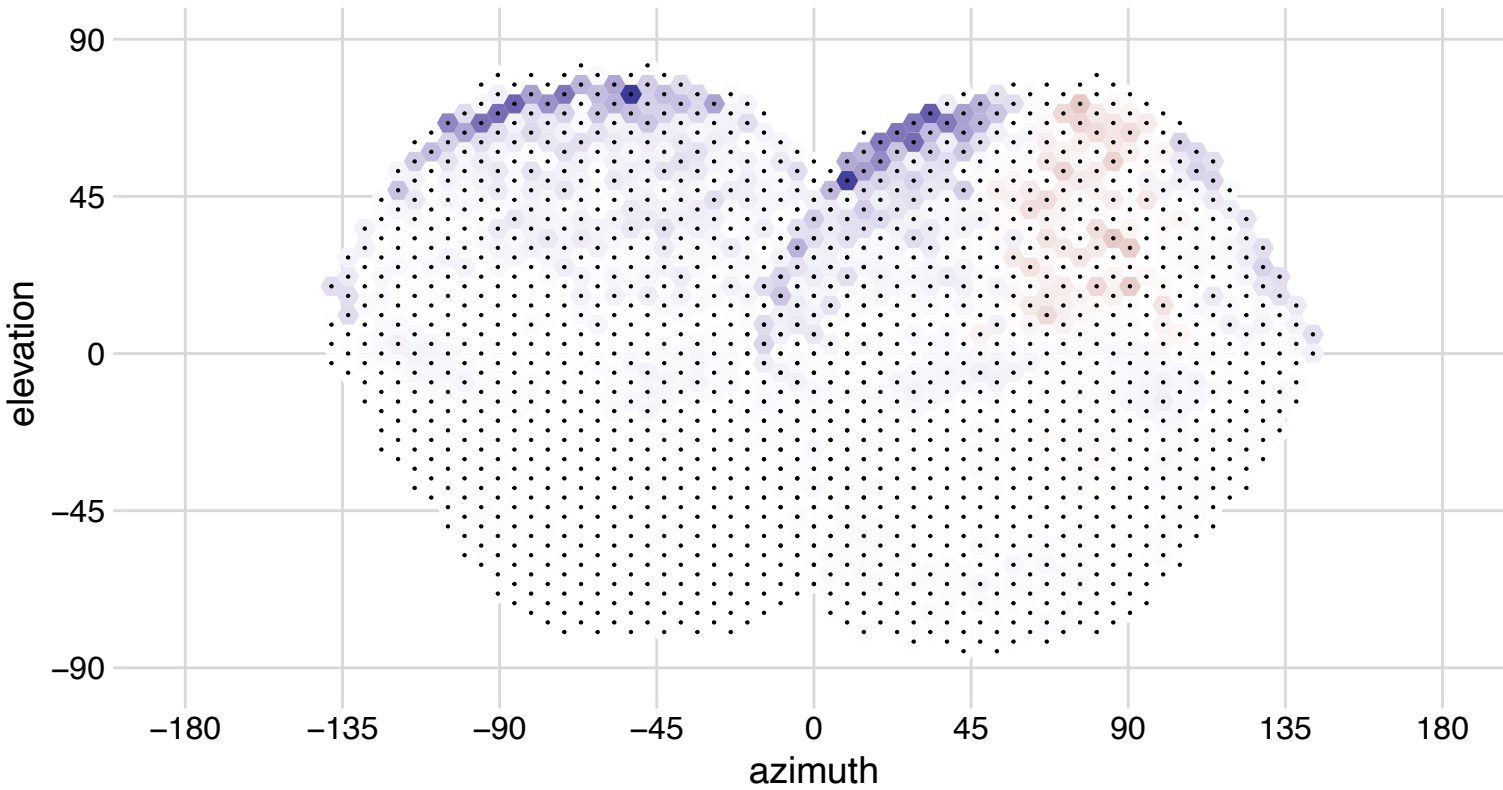

**ER5 720575940632366879**

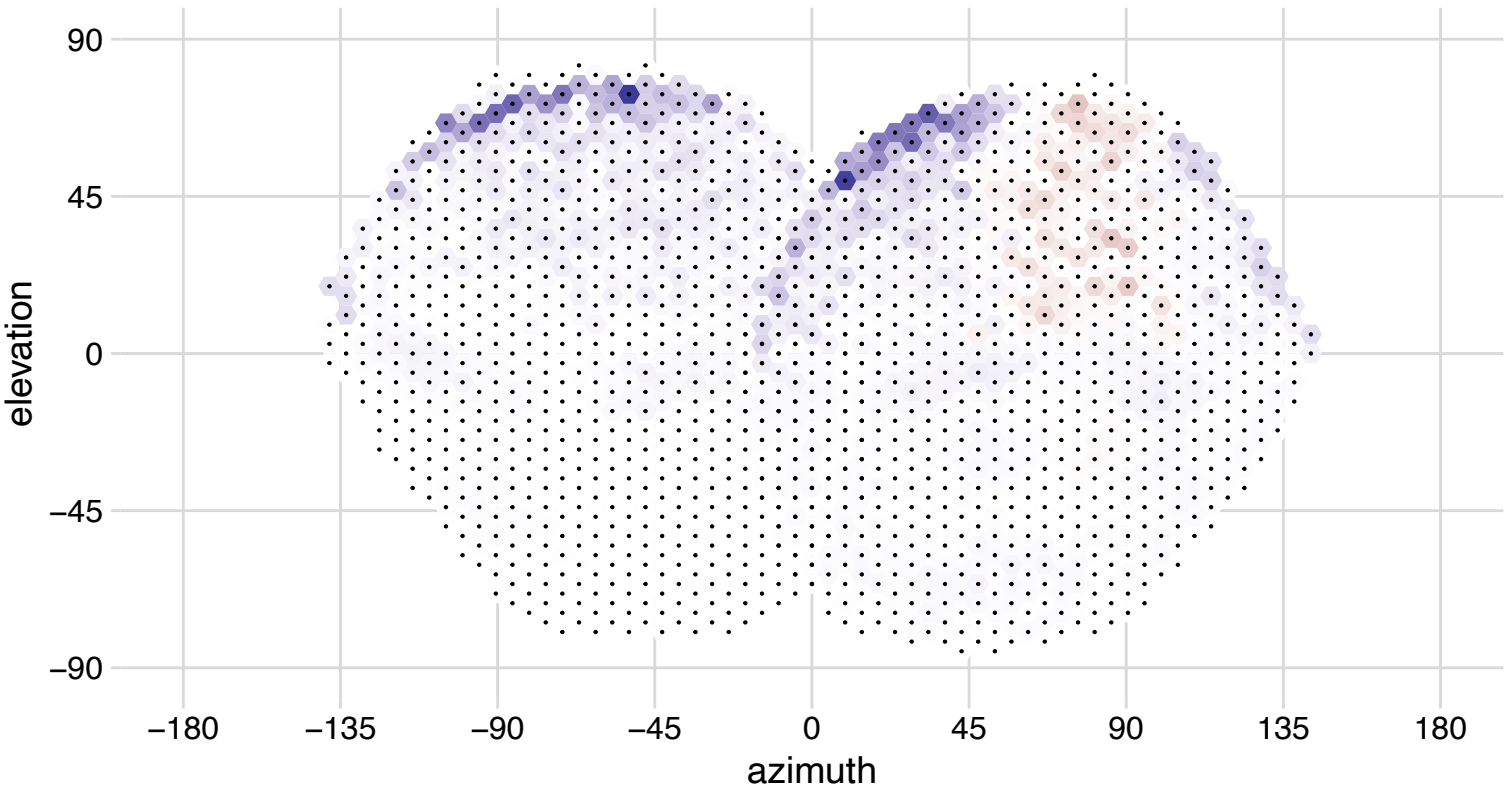

**ER5 720575940637126222**

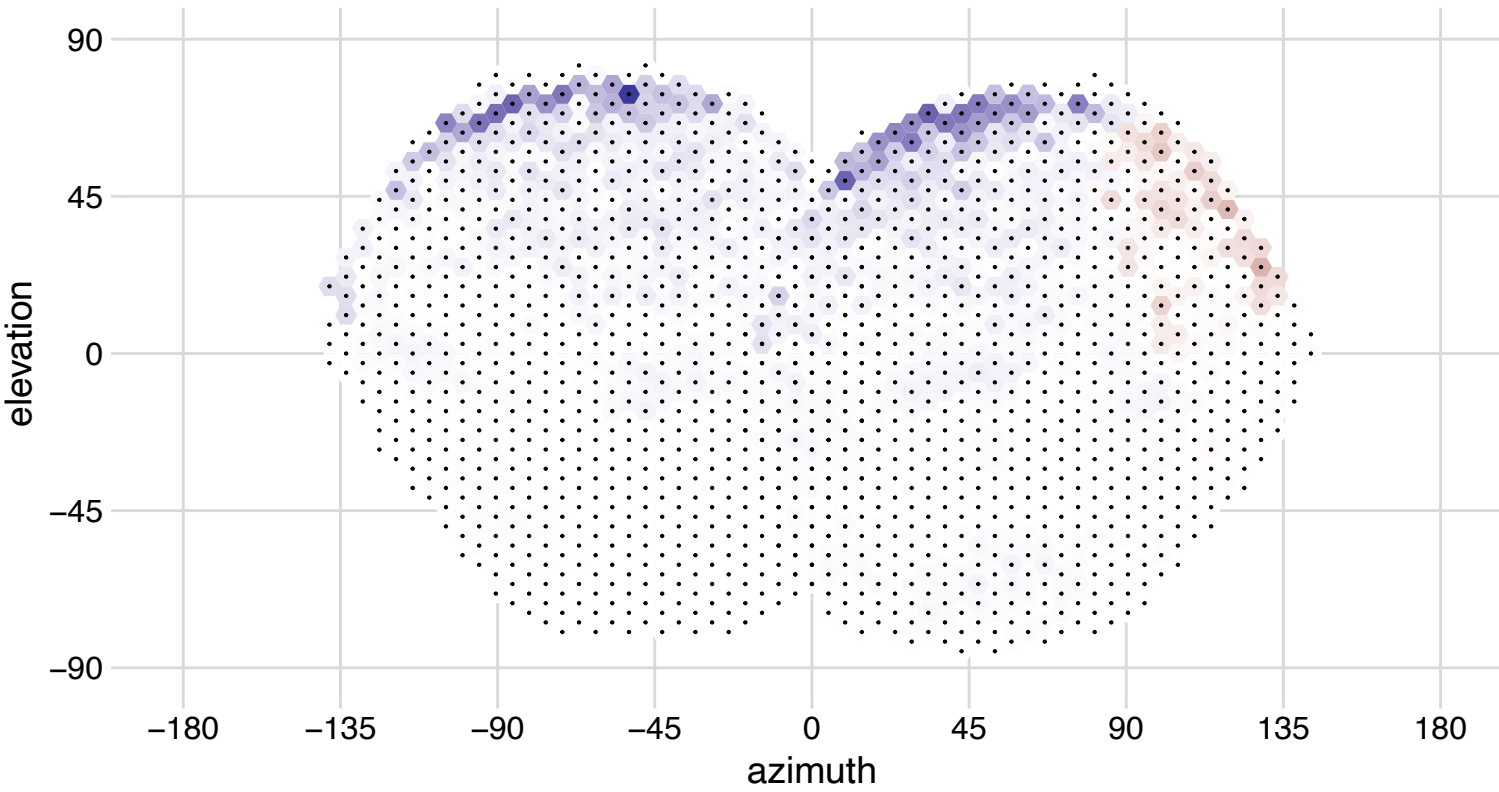

**ER5 720575940652809889**

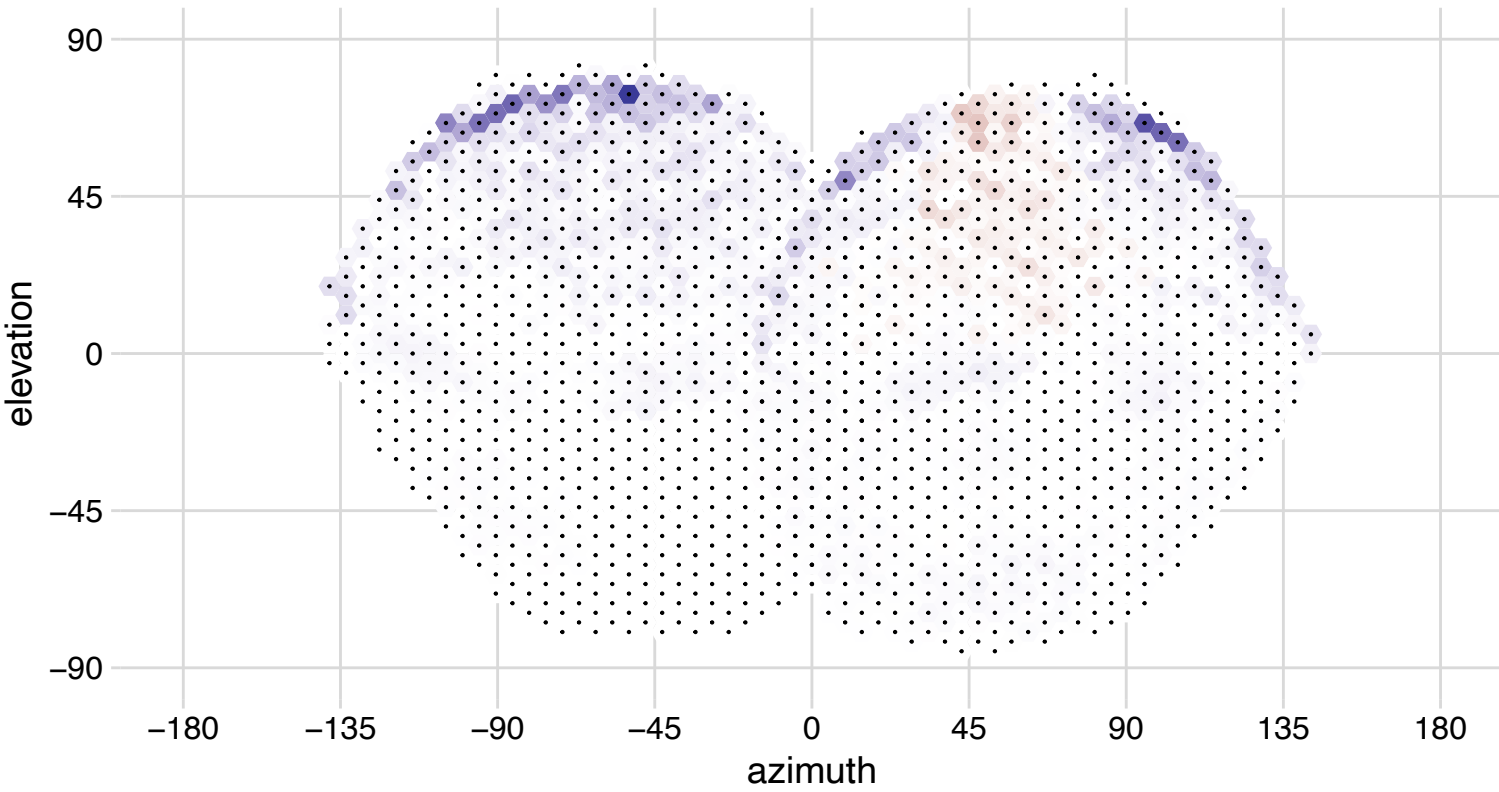



**ER6 720575940617523174**

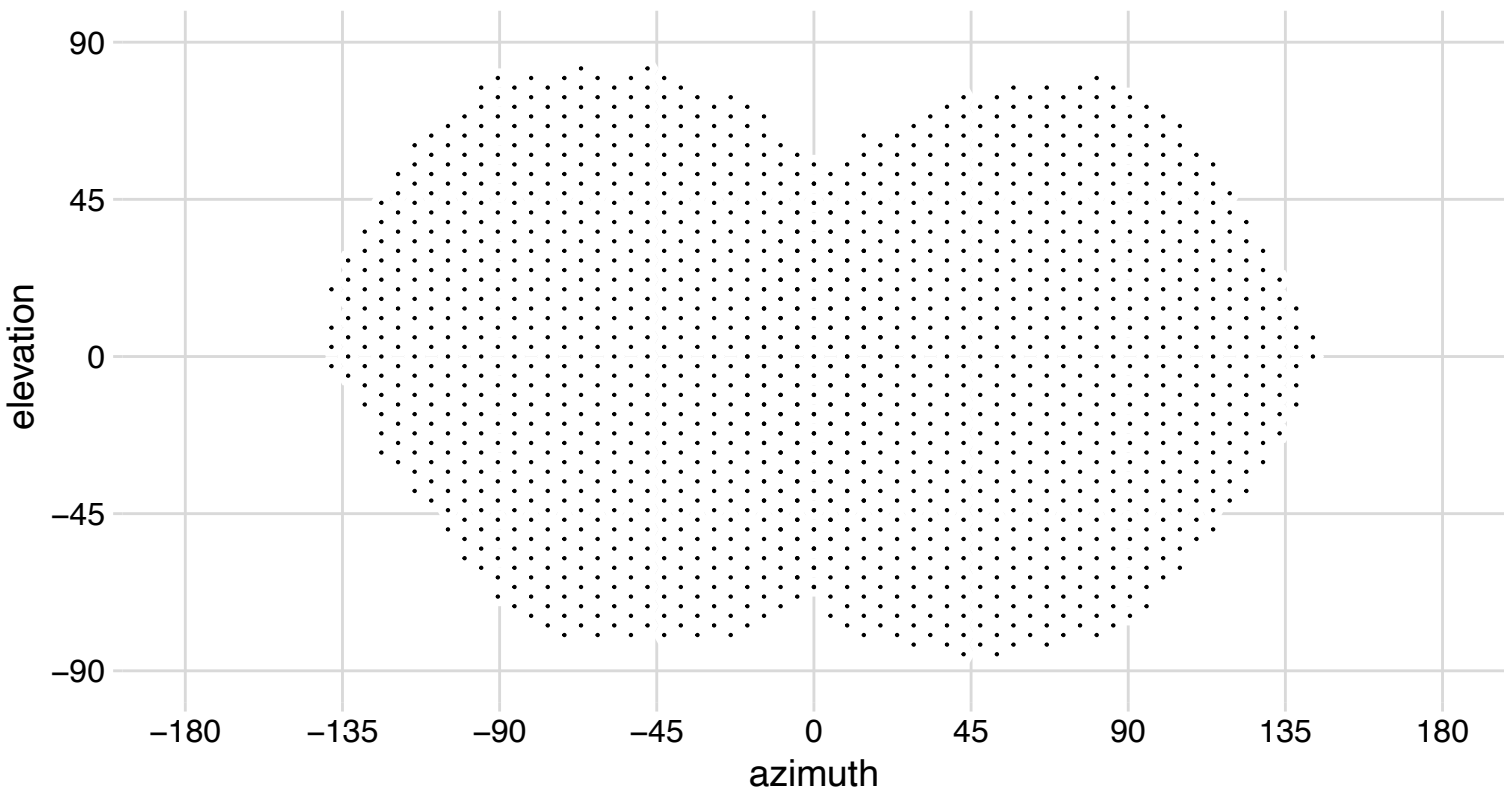

**ER6 720575940640147315**

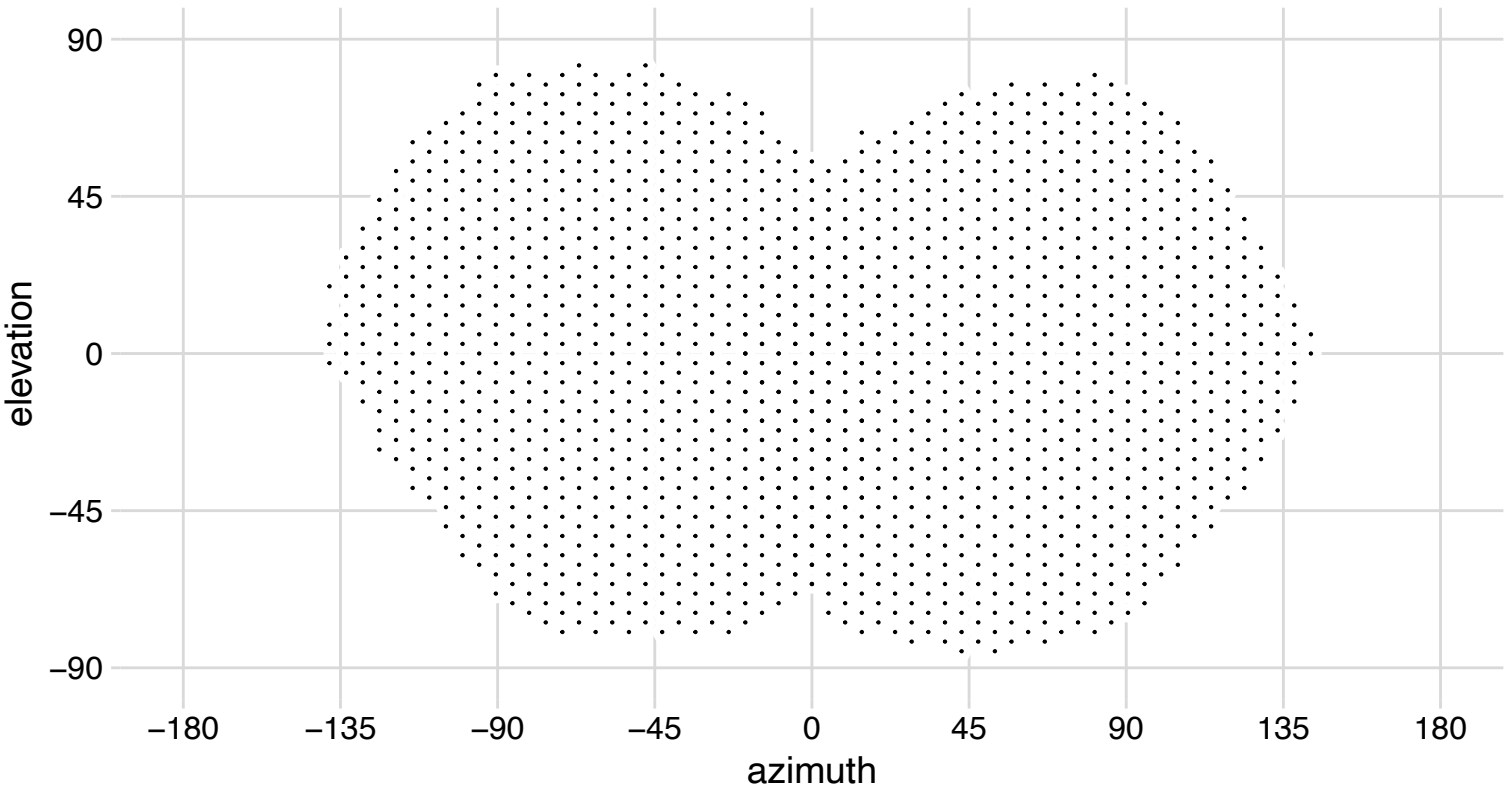

Supplement: media-5.pdf [file media-5.pdf]
